# Supplementary material for: Ubiquitin Interacting Motifs: Duality Between Structured and Disordered Motifs
Source: PubMed Central journal article supplement (PMC8273247; doi:10.3389/fmolb.2021.676235), 2021-06-28
Supplement: Table5.pdf [file Table5.pdf]

PROSITE

Home | Contact

Prosite logo

HomeScanPrositeProRuleDocumentsDownloadsLinksFunding

ScanProsite tool

Output format: Table

Hits for USERPAT1{x-[ED]-[ED]-[ED]-x-[AILVFWMP]-x-x(1,2)-[AVP]-[VPL]-[EDVNTCGPH]-x-S-x-x-[EDTVNCGPH]-x} motif on all MsFJlCjLEK custom database database sequences :

found: 1614 hits in 626 sequences

Graphical view (graphical view with feature detection)  
shaded alignment of hits

|                      |     |            |   |   |
|----------------------|-----|------------|---|---|
| A0A060VR78_ONCMY 681 | 697 | USERPAT1 . | . | . |
| nDEEmLaa.VLEmSrqDa   |     |            |   |   |
| A0A060VR78_ONCMY 681 | 697 | USERPAT1 . | . | . |
| nDEEmLaa.VLEmSrqDa   |     |            |   |   |
| A0A060VR78_ONCMY 681 | 697 | USERPAT1 . | . | . |
| nDEEmLaa.VLEmSrqDa   |     |            |   |   |
| A0A060WGY3_ONCMY 141 | 158 | USERPAT1 . | . | . |
| tDEEqAisrVLEaSiaEn   |     |            |   |   |
| A0A060WGY3_ONCMY 141 | 158 | USERPAT1 . | . | . |
| tDEEqAisrVLEaSiaEn   |     |            |   |   |
| A0A067P993_PLE0S 93  | 109 | USERPAT1 . | . | . |
| gEDDeLsr.ALNlSmeTh   |     |            |   |   |
| A0A067P993_PLE0S 93  | 109 | USERPAT1 . | . | . |
| gEDDeLsr.ALNlSmeTh   |     |            |   |   |
| A0A087QTT4_APTF0 714 | 730 | USERPAT1 . | . | . |
| sEDElLaa.VLEiSkrEa   |     |            |   |   |
| A0A087QTT4_APTF0 714 | 730 | USERPAT1 . | . | . |
| sEDElLaa.VLEiSkrEa   |     |            |   |   |
| A0A087QTT4_APTF0 714 | 730 | USERPAT1 . | . | . |
| sEDElLaa.VLEiSkrEa   |     |            |   |   |
| A0A087Y5I7_POEF0 680 | 696 | USERPAT1 . | . | . |
| nDDEmLaa.VLEmSreEa   |     |            |   |   |
| A0A087Y5I7_POEF0 680 | 696 | USERPAT1 . | . | . |
| nDDEmLaa.VLEmSreEa   |     |            |   |   |
| A0A087Y5I7_POEF0 680 | 696 | USERPAT1 . | . | . |
| nDDEmLaa.VLEmSreEa   |     |            |   |   |
| A0A091CKQ7_FUKDA 281 | 297 | USERPAT1 . | . | . |
| sEEDmLqa.AVTmSleTv   |     |            |   |   |
| A0A091CKQ7_FUKDA 281 | 297 | USERPAT1 . | . | . |
| sEEDmLqa.AVTmSleTv   |     |            |   |   |

|                                            |     |            |   |   |
|--------------------------------------------|-----|------------|---|---|
| A0A091CKQ7_FUKDA 281<br>sEEDmLqa.AVTmSleTv | 297 | USERPAT1 . | . | . |
| A0A091CS09_FUKDA 705<br>sEEElLaa.VLEiSkrEa | 721 | USERPAT1 . | . | . |
| A0A091CS09_FUKDA 705<br>sEEElLaa.VLEiSkrEa | 721 | USERPAT1 . | . | . |
| A0A091CS09_FUKDA 705<br>sEEElLaa.VLEiSkrEa | 721 | USERPAT1 . | . | . |
| A0A091EF63_CORBR 714<br>sEDElLaa.VLEiSkrEa | 730 | USERPAT1 . | . | . |
| A0A091EF63_CORBR 714<br>sEDElLaa.VLEiSkrEa | 730 | USERPAT1 . | . | . |
| A0A091EF63_CORBR 714<br>sEDElLaa.VLEiSkrEa | 730 | USERPAT1 . | . | . |
| A0A091FKM6_9AVES 714<br>sEDElLaa.VLEiSkrEa | 730 | USERPAT1 . | . | . |
| A0A091FKM6_9AVES 714<br>sEDElLaa.VLEiSkrEa | 730 | USERPAT1 . | . | . |
| A0A091FKM6_9AVES 714<br>sEDElLaa.VLEiSkrEa | 730 | USERPAT1 . | . | . |
| A0A091IUL0_CALAN 714<br>sEDElLaa.VLEiSkrEa | 730 | USERPAT1 . | . | . |
| A0A091IUL0_CALAN 714<br>sEDElLaa.VLEiSkrEa | 730 | USERPAT1 . | . | . |
| A0A091IUL0_CALAN 714<br>sEDElLaa.VLEiSkrEa | 730 | USERPAT1 . | . | . |
| A0A091JKT2_EGRGA 715<br>sEDElLaa.VLEiSkrEa | 731 | USERPAT1 . | . | . |
| A0A091JKT2_EGRGA 715<br>sEDElLaa.VLEiSkrEa | 731 | USERPAT1 . | . | . |
| A0A091JKT2_EGRGA 715<br>sEDElLaa.VLEiSkrEa | 731 | USERPAT1 . | . | . |
| A0A091UXJ9_NIPNI 715<br>sEDElLaa.VLEiSkrEa | 731 | USERPAT1 . | . | . |
| A0A091UXJ9_NIPNI 715<br>sEDElLaa.VLEiSkrEa | 731 | USERPAT1 . | . | . |
| A0A091UXJ9_NIPNI 715<br>sEDElLaa.VLEiSkrEa | 731 | USERPAT1 . | . | . |
| A0A091VMP1_OPIH0 714<br>sEDElLaa.VLEiSkrEa | 730 | USERPAT1 . | . | . |
| A0A091VMP1_OPIH0 714<br>sEDElLaa.VLEiSkrEa | 730 | USERPAT1 . | . | . |
| A0A091VMP1_OPIH0 714<br>sEDElLaa.VLEiSkrEa | 730 | USERPAT1 . | . | . |
| A0A091VP97_OPIH0 109<br>sEEELqr.ALEmSlaEs  | 125 | USERPAT1 . | . | . |

|                      |     |            |   |   |
|----------------------|-----|------------|---|---|
| A0A093FZT0_DRYPU 714 | 730 | USERPAT1 . | . | . |
| sEDElLaa.VLEiSkrEa   |     |            |   |   |
| A0A093FZT0_DRYPU 714 | 730 | USERPAT1 . | . | . |
| sEDElLaa.VLEiSkrEa   |     |            |   |   |
| A0A093FZT0_DRYPU 714 | 730 | USERPAT1 . | . | . |
| sEDElLaa.VLEiSkrEa   |     |            |   |   |
| A0A093J736_STRCA 714 | 730 | USERPAT1 . | . | . |
| sEDElLaa.VLEiSkrEa   |     |            |   |   |
| A0A093J736_STRCA 714 | 730 | USERPAT1 . | . | . |
| sEDElLaa.VLEiSkrEa   |     |            |   |   |
| A0A093J736_STRCA 714 | 730 | USERPAT1 . | . | . |
| sEDElLaa.VLEiSkrEa   |     |            |   |   |
| A0A096MP66_PAPAN 123 | 140 | USERPAT1 . | . | . |
| tDEEqAisrVLEaSiaEn   |     |            |   |   |
| A0A096MP66_PAPAN 123 | 140 | USERPAT1 . | . | . |
| tDEEqAisrVLEaSiaEn   |     |            |   |   |
| A0A096NFH7_PAPAN 705 | 721 | USERPAT1 . | . | . |
| sEEElLaa.VLEiSkrDa   |     |            |   |   |
| A0A096NFH7_PAPAN 705 | 721 | USERPAT1 . | . | . |
| sEEElLaa.VLEiSkrDa   |     |            |   |   |
| A0A096NZ11_PAPAN 123 | 140 | USERPAT1 . | . | . |
| tDEEqAisrVLEaSiaEn   |     |            |   |   |
| A0A096NZ11_PAPAN 123 | 140 | USERPAT1 . | . | . |
| tDEEqAisrVLEaSiaEn   |     |            |   |   |
| A0A099ZA85_TINGU 714 | 730 | USERPAT1 . | . | . |
| sEDElLaa.VLEiSkrEa   |     |            |   |   |
| A0A099ZA85_TINGU 714 | 730 | USERPAT1 . | . | . |
| sEDElLaa.VLEiSkrEa   |     |            |   |   |
| A0A099ZA85_TINGU 714 | 730 | USERPAT1 . | . | . |
| sEDElLaa.VLEiSkrEa   |     |            |   |   |
| A0A099ZXF8_CHAVO 714 | 730 | USERPAT1 . | . | . |
| sEDElLaa.VLEiSkrEa   |     |            |   |   |
| A0A099ZXF8_CHAVO 714 | 730 | USERPAT1 . | . | . |
| sEDElLaa.VLEiSkrEa   |     |            |   |   |
| A0A099ZXF8_CHAVO 714 | 730 | USERPAT1 . | . | . |
| sEDElLaa.VLEiSkrEa   |     |            |   |   |
| A0A0A0MS38_HUMAN 284 | 300 | USERPAT1 . | . | . |
| sEEDmLqa.AVTmSleTv   |     |            |   |   |
| A0A0A0MS38_HUMAN 284 | 300 | USERPAT1 . | . | . |
| sEEDmLqa.AVTmSleTv   |     |            |   |   |
| A0A0A0MS38_HUMAN 284 | 300 | USERPAT1 . | . | . |
| sEEDmLqa.AVTmSleTv   |     |            |   |   |
| A0A0D2N727_9AGAR 164 | 180 | USERPAT1 . | . | . |
| kEEELqr.VLEmSmqDk    |     |            |   |   |

|                      |     |            |   |   |
|----------------------|-----|------------|---|---|
| A0A0D9R8Z2_CHLSB 706 | 722 | USERPAT1 . | . | . |
| sEEElLaa.VLEiSkrDa   |     |            |   |   |
| A0A0D9R8Z2_CHLSB 706 | 722 | USERPAT1 . | . | . |
| sEEElLaa.VLEiSkrDa   |     |            |   |   |
| A0A0D9R913_CHLSB 111 | 128 | USERPAT1 . | . | . |
| tDEEqAisrVLEaSiaEn   |     |            |   |   |
| A0A0D9R913_CHLSB 111 | 128 | USERPAT1 . | . | . |
| tDEEqAisrVLEaSiaEn   |     |            |   |   |
| A0A0G4MMG8_9PEZI 816 | 832 | USERPAT1 . | . | . |
| dDDEdFkr.ALEaSkiPs   |     |            |   |   |
| A0A0G4MMG8_9PEZI 816 | 832 | USERPAT1 . | . | . |
| dDDEdFkr.ALEaSkiPs   |     |            |   |   |
| A0A0G4MMG8_9PEZI 816 | 832 | USERPAT1 . | . | . |
| dDDEdFkr.ALEaSkiPs   |     |            |   |   |
| A0A0G4MMG8_9PEZI 816 | 832 | USERPAT1 . | . | . |
| dDDEdFkr.ALEaSkiPs   |     |            |   |   |
| A0A0G4MMG8_9PEZI 816 | 832 | USERPAT1 . | . | . |
| dDDEdFkr.ALEaSkiPs   |     |            |   |   |
| A0A0G4MR85_9PEZI 588 | 604 | USERPAT1 . | . | . |
| dDDEdFkr.ALEaSkiPs   |     |            |   |   |
| A0A0G4MR85_9PEZI 588 | 604 | USERPAT1 . | . | . |
| dDDEdFkr.ALEaSkiPs   |     |            |   |   |
| A0A0G4MR85_9PEZI 588 | 604 | USERPAT1 . | . | . |
| dDDEdFkr.ALEaSkiPs   |     |            |   |   |
| A0A0G4MR85_9PEZI 588 | 604 | USERPAT1 . | . | . |
| dDDEdFkr.ALEaSkiPs   |     |            |   |   |
| A0A0G4MR85_9PEZI 588 | 604 | USERPAT1 . | . | . |
| dDDEdFkr.ALEaSkiPs   |     |            |   |   |
| A0A0H2UKG5_DANRE 670 | 686 | USERPAT1 . | . | . |
| nDEEmLaa.VLEmSrhDt   |     |            |   |   |
| A0A0H2UKG5_DANRE 670 | 686 | USERPAT1 . | . | . |
| nDEEmLaa.VLEmSrhDt   |     |            |   |   |
| A0A0H2UKG5_DANRE 670 | 686 | USERPAT1 . | . | . |
| nDEEmLaa.VLEmSrhDt   |     |            |   |   |
| A0A0K3C6D2_RH0T0 338 | 354 | USERPAT1 . | . | . |
| eEDEnLrr.ALElSraGe   |     |            |   |   |
| A0A0K3C6D2_RH0T0 338 | 354 | USERPAT1 . | . | . |
| eEDEnLrr.ALElSraGe   |     |            |   |   |
| A0A0K3C6D2_RH0T0 338 | 354 | USERPAT1 . | . | . |
| eEDEnLrr.ALElSraGe   |     |            |   |   |
| A0A0L0DRJ6_THETB 140 | 156 | USERPAT1 . | . | . |
| dDDEeLqr.VLElSrlEa   |     |            |   |   |
| A0A0L0DRJ6_THETB 140 | 156 | USERPAT1 . | . | . |
| dDDEeLqr.VLElSrlEa   |     |            |   |   |
| A0A0L0HM51_SIPID 254 | 270 | USERPAT1 . | . | . |
| pEEdLkr.ALEqSlLEg    |     |            |   |   |
| A0A0L0HM51_SIPID 254 | 270 | USERPAT1 . | . | . |

pEEdLkr.ALEqSllEg

|                                             |     |            |   |   |
|---------------------------------------------|-----|------------|---|---|
| A0A0L6WE66_9AGAR 305<br>dDEErLlqqALVmSqeGn  | 322 | USERPAT1 . | . | . |
| A0A0L6WE66_9AGAR 305<br>dDEErLlqqALVmSqeGn  | 322 | USERPAT1 . | . | . |
| A0A0L6WE66_9AGAR 305<br>dDEErLlqqALVmSqeGn  | 322 | USERPAT1 . | . | . |
| A0A0P7U669_SCLF0 677<br>nDDEmLaa.VLEmSrqDa  | 693 | USERPAT1 . | . | . |
| A0A0P7U669_SCLF0 677<br>nDDEmLaa.VLEmSrqDa  | 693 | USERPAT1 . | . | . |
| A0A0P7U669_SCLF0 677<br>nDDEmLaa.VLEmSrqDa  | 693 | USERPAT1 . | . | . |
| A0A0P7UQA9_SCLF0 198<br>tDEEqAisrVLEaSiaEn  | 215 | USERPAT1 . | . | . |
| A0A0P7UQA9_SCLF0 198<br>tDEEqAisrVLEaSiaEn  | 215 | USERPAT1 . | . | . |
| A0A0P7X588_SCLF0 110<br>tDEEqAisrVLEaSiaEn  | 127 | USERPAT1 . | . | . |
| A0A0P7X588_SCLF0 110<br>tDEEqAisrVLEaSiaEn  | 127 | USERPAT1 . | . | . |
| A0A0Q3RFT5_AMAAE 511<br>sEDELlLaa.VLEiSkrEa | 527 | USERPAT1 . | . | . |
| A0A0Q3RFT5_AMAAE 511<br>sEDELlLaa.VLEiSkrEa | 527 | USERPAT1 . | . | . |
| A0A0Q3RFT5_AMAAE 511<br>sEDELlLaa.VLEiSkrEa | 527 | USERPAT1 . | . | . |
| A0A0Q9XLI1_DR0M0 568<br>eDDEqLqr.VLHeSlmGa  | 584 | USERPAT1 . | . | . |
| A0A0Q9XLI1_DR0M0 568<br>eDDEqLqr.VLHeSlmGa  | 584 | USERPAT1 . | . | . |
| A0A0Q9XLI1_DR0M0 568<br>eDDEqLqr.VLHeSlmGa  | 584 | USERPAT1 . | . | . |
| A0A0Q9XLI1_DR0M0 568<br>eDDEqLqr.VLHeSlmGa  | 584 | USERPAT1 . | . | . |
| A0A0R4J2D0_MOUSE 704<br>sEEEvLaa.VLEiSrrEa  | 720 | USERPAT1 . | . | . |
| A0A0R4J2D0_MOUSE 704<br>sEEEvLaa.VLEiSrrEa  | 720 | USERPAT1 . | . | . |
| A0A0R4J2D0_MOUSE 704<br>sEEEvLaa.VLEiSrrEa  | 720 | USERPAT1 . | . | . |
| A0A0W8CIL9_PHYNI 330<br>dEEdIrk.ALElSlqTa   | 346 | USERPAT1 . | . | . |
| A0A151N8X1_ALLMI 710<br>sEDELlLaa.VLEiSkrEa | 726 | USERPAT1 . | . | . |

|                       |      |            |   |   |
|-----------------------|------|------------|---|---|
| A0A151N8X1_ALLMI 710  | 726  | USERPAT1 . | . | . |
| sEEDeLLaa.VLEiSkrEa   |      |            |   |   |
| A0A151N8X1_ALLMI 710  | 726  | USERPAT1 . | . | . |
| sEEDeLLaa.VLEiSkrEa   |      |            |   |   |
| A0A168I4K6_MUCCL 304  | 320  | USERPAT1 . | . | . |
| nEDDaLqr.ALEmSmnDg    |      |            |   |   |
| A0A168I4K6_MUCCL 304  | 320  | USERPAT1 . | . | . |
| nEDDaLqr.ALEmSmnDg    |      |            |   |   |
| A0A168I4K6_MUCCL 304  | 320  | USERPAT1 . | . | . |
| nEDDaLqr.ALEmSmnDg    |      |            |   |   |
| A0A178AIS1_9PLE0 1197 | 1213 | USERPAT1 . | . | . |
| tDEEdLqk.ALElSmkEh    |      |            |   |   |
| A0A178AIS1_9PLE0 1197 | 1213 | USERPAT1 . | . | . |
| tDEEdLqk.ALElSmkEh    |      |            |   |   |
| A0A1A6HL89_NEOLE 277  | 293  | USERPAT1 . | . | . |
| sEEDiLra.AVTmSleTa    |      |            |   |   |
| A0A1A6HL89_NEOLE 277  | 293  | USERPAT1 . | . | . |
| sEEDiLra.AVTmSleTa    |      |            |   |   |
| A0A1A6HL89_NEOLE 277  | 293  | USERPAT1 . | . | . |
| sEEDiLra.AVTmSleTa    |      |            |   |   |
| A0A1D2MH25_ORCCI 153  | 169  | USERPAT1 . | . | . |
| eEEEnLkk.VLElSlkEq    |      |            |   |   |
| A0A1D2MH25_ORCCI 153  | 169  | USERPAT1 . | . | . |
| eEEEnLkk.VLElSlkEq    |      |            |   |   |
| A0A1D5Q7L5_MACMU 123  | 140  | USERPAT1 . | . | . |
| tDEEqAisrVLEaSiaEn    |      |            |   |   |
| A0A1D5Q7L5_MACMU 123  | 140  | USERPAT1 . | . | . |
| tDEEqAisrVLEaSiaEn    |      |            |   |   |
| A0A1D5QWL7_MACMU 283  | 299  | USERPAT1 . | . | . |
| gEEDmLqa.AVTmSleTv    |      |            |   |   |
| A0A1D5QWL7_MACMU 283  | 299  | USERPAT1 . | . | . |
| gEEDmLqa.AVTmSleTv    |      |            |   |   |
| A0A1D5QWL7_MACMU 283  | 299  | USERPAT1 . | . | . |
| gEEDmLqa.AVTmSleTv    |      |            |   |   |
| A0A1D5R1Y0_MACMU 278  | 294  | USERPAT1 . | . | . |
| gEEDmLqa.AVTmSleTv    |      |            |   |   |
| A0A1D5R1Y0_MACMU 278  | 294  | USERPAT1 . | . | . |
| gEEDmLqa.AVTmSleTv    |      |            |   |   |
| A0A1D5R1Y0_MACMU 278  | 294  | USERPAT1 . | . | . |
| gEEDmLqa.AVTmSleTv    |      |            |   |   |
| A0A1D5REK4_MACMU 264  | 280  | USERPAT1 . | . | . |
| gEEDmLqa.AVTmSleTv    |      |            |   |   |
| A0A1D5REK4_MACMU 264  | 280  | USERPAT1 . | . | . |
| gEEDmLqa.AVTmSleTv    |      |            |   |   |
| A0A1D5REK4_MACMU 264  | 280  | USERPAT1 . | . | . |
| gEEDmLqa.AVTmSleTv    |      |            |   |   |

|                      |     |            |   |   |
|----------------------|-----|------------|---|---|
| A0A1D5RK12_MACMU 325 | 341 | USERPAT1 . | . | . |
| gEEDmLqa.AVTmSleTv   |     |            |   |   |
| A0A1D5RK12_MACMU 325 | 341 | USERPAT1 . | . | . |
| gEEDmLqa.AVTmSleTv   |     |            |   |   |
| A0A1D5RK12_MACMU 325 | 341 | USERPAT1 . | . | . |
| gEEDmLqa.AVTmSleTv   |     |            |   |   |
| A0A1E4S9B1_CYBJN 256 | 272 | USERPAT1 . | . | . |
| dDDDdLkr.ALElSlkEs   |     |            |   |   |
| A0A1E4S9B1_CYBJN 256 | 272 | USERPAT1 . | . | . |
| dDDDdLkr.ALElSlkEs   |     |            |   |   |
| A0A1I7TNE3_9PELO 485 | 501 | USERPAT1 . | . | . |
| dEEEdLrL.ALElSrqEh   |     |            |   |   |
| A0A1L8ENU6_XENLA 696 | 712 | USERPAT1 . | . | . |
| nDEElMaa.VLEmSkrEt   |     |            |   |   |
| A0A1L8ENU6_XENLA 696 | 712 | USERPAT1 . | . | . |
| nDEElMaa.VLEmSkrEt   |     |            |   |   |
| A0A1L8ENU6_XENLA 696 | 712 | USERPAT1 . | . | . |
| nDEElMaa.VLEmSkrEt   |     |            |   |   |
| A0A1L8EVK7_XENLA 197 | 213 | USERPAT1 . | . | . |
| tEEeALqr.ALEmSlaEs   |     |            |   |   |
| A0A1L8EVS5_XENLA 702 | 718 | USERPAT1 . | . | . |
| nDEElVaa.VLEmSkkEt   |     |            |   |   |
| A0A1L8EVS5_XENLA 702 | 718 | USERPAT1 . | . | . |
| nDEElVaa.VLEmSkkEt   |     |            |   |   |
| A0A1P8B9V9_ARATH 235 | 251 | USERPAT1 . | . | . |
| dEDEqLak.AVEeSlkGk   |     |            |   |   |
| A0A1P8B9V9_ARATH 235 | 251 | USERPAT1 . | . | . |
| dEDEqLak.AVEeSlkGk   |     |            |   |   |
| A0A1P8B9X5_ARATH 235 | 251 | USERPAT1 . | . | . |
| dEDEqLak.AVEeSlkGk   |     |            |   |   |
| A0A1P8B9X5_ARATH 235 | 251 | USERPAT1 . | . | . |
| dEDEqLak.AVEeSlkGk   |     |            |   |   |
| A0A1S2ZIA5_ERIEU 153 | 169 | USERPAT1 . | . | . |
| tEDEaLqr.ALElSleEt   |     |            |   |   |
| A0A1S2ZIC2_ERIEU 197 | 213 | USERPAT1 . | . | . |
| tEDEaLqr.ALElSleEt   |     |            |   |   |
| A0A1S3ERZ2_DIPOR 680 | 696 | USERPAT1 . | . | . |
| sEEElLaa.VLEiSkrEa   |     |            |   |   |
| A0A1S3ERZ2_DIPOR 680 | 696 | USERPAT1 . | . | . |
| sEEElLaa.VLEiSkrEa   |     |            |   |   |
| A0A1S3ERZ2_DIPOR 680 | 696 | USERPAT1 . | . | . |
| sEEElLaa.VLEiSkrEa   |     |            |   |   |

|                                            |     |            |   |   |
|--------------------------------------------|-----|------------|---|---|
| A0A1S3ETC3_DIPOR 630<br>sEEElLaa.VLEiSkrEa | 646 | USERPAT1 . | . | . |
| A0A1S3ETC3_DIPOR 630<br>sEEElLaa.VLEiSkrEa | 646 | USERPAT1 . | . | . |
| A0A1S3ETC3_DIPOR 630<br>sEEElLaa.VLEiSkrEa | 646 | USERPAT1 . | . | . |
| A0A1S3EUR3_DIPOR 702<br>sEEElLaa.VLEiSkrEa | 718 | USERPAT1 . | . | . |
| A0A1S3EUR3_DIPOR 702<br>sEEElLaa.VLEiSkrEa | 718 | USERPAT1 . | . | . |
| A0A1S3EUR3_DIPOR 702<br>sEEElLaa.VLEiSkrEa | 718 | USERPAT1 . | . | . |
| A0A1S3F517_DIPOR 224<br>eDEEgLqr.ALTLsrqEi | 240 | USERPAT1 . | . | . |
| A0A1S3F517_DIPOR 224<br>eDEEgLqr.ALTLsrqEi | 240 | USERPAT1 . | . | . |
| A0A1S3F517_DIPOR 224<br>eDEEgLqr.ALTLsrqEi | 240 | USERPAT1 . | . | . |
| A0A1S3F517_DIPOR 329<br>sEEDmLqa.AVTmSleTv | 345 | USERPAT1 . | . | . |
| A0A1S3F517_DIPOR 329<br>sEEDmLqa.AVTmSleTv | 345 | USERPAT1 . | . | . |
| A0A1S3F517_DIPOR 329<br>sEEDmLqa.AVTmSleTv | 345 | USERPAT1 . | . | . |
| A0A1S3F529_DIPOR 223<br>eDEEgLqr.ALTLsrqEi | 239 | USERPAT1 . | . | . |
| A0A1S3F529_DIPOR 223<br>eDEEgLqr.ALTLsrqEi | 239 | USERPAT1 . | . | . |
| A0A1S3F529_DIPOR 223<br>eDEEgLqr.ALTLsrqEi | 239 | USERPAT1 . | . | . |
| A0A1S3F529_DIPOR 328<br>sEEDmLqa.AVTmSleTv | 344 | USERPAT1 . | . | . |
| A0A1S3F529_DIPOR 328<br>sEEDmLqa.AVTmSleTv | 344 | USERPAT1 . | . | . |
| A0A1S3F529_DIPOR 328<br>sEEDmLqa.AVTmSleTv | 344 | USERPAT1 . | . | . |
| A0A1S3F533_DIPOR 217<br>eDEEgLqr.ALTLsrqEi | 233 | USERPAT1 . | . | . |
| A0A1S3F533_DIPOR 217<br>eDEEgLqr.ALTLsrqEi | 233 | USERPAT1 . | . | . |
| A0A1S3F533_DIPOR 217<br>eDEEgLqr.ALTLsrqEi | 233 | USERPAT1 . | . | . |
| A0A1S3F533_DIPOR 322<br>sEEDmLqa.AVTmSleTv | 338 | USERPAT1 . | . | . |
| A0A1S3F533_DIPOR 322<br>sEEDmLqa.AVTmSleTv | 338 | USERPAT1 . | . | . |
| A0A1S3F533_DIPOR 322<br>sEEDmLqa.AVTmSleTv | 338 | USERPAT1 . | . | . |
| A0A1S3F545_DIPOR 173                       | 189 | USERPAT1 . | . | . |



|                    |     |     |            |   |   |
|--------------------|-----|-----|------------|---|---|
| eDEEgLqr.ALTlSrqEi |     |     |            |   |   |
| A0A1S3F545_DIPOR   | 173 | 189 | USERPAT1 . | . | . |
| eDEEgLqr.ALTlSrqEi |     |     |            |   |   |
| A0A1S3F545_DIPOR   | 173 | 189 | USERPAT1 . | . | . |
| eDEEgLqr.ALTlSrqEi |     |     |            |   |   |
| A0A1S3F545_DIPOR   | 278 | 294 | USERPAT1 . | . | . |
| sEEDmLqa.AVTmSleTv |     |     |            |   |   |
| A0A1S3F545_DIPOR   | 278 | 294 | USERPAT1 . | . | . |
| sEEDmLqa.AVTmSleTv |     |     |            |   |   |
| A0A1S3F545_DIPOR   | 278 | 294 | USERPAT1 . | . | . |
| sEEDmLqa.AVTmSleTv |     |     |            |   |   |
| A0A1S3F577_DIPOR   | 177 | 193 | USERPAT1 . | . | . |
| eDEEgLqr.ALTlSrqEi |     |     |            |   |   |
| A0A1S3F577_DIPOR   | 177 | 193 | USERPAT1 . | . | . |
| eDEEgLqr.ALTlSrqEi |     |     |            |   |   |
| A0A1S3F577_DIPOR   | 177 | 193 | USERPAT1 . | . | . |
| eDEEgLqr.ALTlSrqEi |     |     |            |   |   |
| A0A1S3F577_DIPOR   | 282 | 298 | USERPAT1 . | . | . |
| sEEDmLqa.AVTmSleTv |     |     |            |   |   |
| A0A1S3F577_DIPOR   | 282 | 298 | USERPAT1 . | . | . |
| sEEDmLqa.AVTmSleTv |     |     |            |   |   |
| A0A1S3F577_DIPOR   | 282 | 298 | USERPAT1 . | . | . |
| sEEDmLqa.AVTmSleTv |     |     |            |   |   |
| A0A1S3F586_DIPOR   | 224 | 240 | USERPAT1 . | . | . |
| eDEEgLqr.ALTlSrqEi |     |     |            |   |   |
| A0A1S3F586_DIPOR   | 224 | 240 | USERPAT1 . | . | . |
| eDEEgLqr.ALTlSrqEi |     |     |            |   |   |
| A0A1S3F638_DIPOR   | 224 | 240 | USERPAT1 . | . | . |
| eDEEgLqr.ALTlSrqEi |     |     |            |   |   |
| A0A1S3F638_DIPOR   | 224 | 240 | USERPAT1 . | . | . |
| eDEEgLqr.ALTlSrqEi |     |     |            |   |   |
| A0A1S3F638_DIPOR   | 224 | 240 | USERPAT1 . | . | . |
| eDEEgLqr.ALTlSrqEi |     |     |            |   |   |
| A0A1S3F638_DIPOR   | 328 | 344 | USERPAT1 . | . | . |
| sEEDmLqa.AVTmSleTv |     |     |            |   |   |
| A0A1S3F638_DIPOR   | 328 | 344 | USERPAT1 . | . | . |
| sEEDmLqa.AVTmSleTv |     |     |            |   |   |
| A0A1S3F638_DIPOR   | 328 | 344 | USERPAT1 . | . | . |
| sEEDmLqa.AVTmSleTv |     |     |            |   |   |
| A0A1S3F6W2_DIPOR   | 173 | 189 | USERPAT1 . | . | . |
| eDEEgLqr.ALTlSrqEi |     |     |            |   |   |
| A0A1S3F6W2_DIPOR   | 173 | 189 | USERPAT1 . | . | . |
| eDEEgLqr.ALTlSrqEi |     |     |            |   |   |
| A0A1S3F6W2_DIPOR   | 173 | 189 | USERPAT1 . | . | . |
| eDEEgLqr.ALTlSrqEi |     |     |            |   |   |
| A0A1S3F6W2_DIPOR   | 277 | 293 | USERPAT1 . | . | . |
| sEEDmLqa.AVTmSleTv |     |     |            |   |   |
| A0A1S3F6W2_DIPOR   | 277 | 293 | USERPAT1 . | . | . |
| sEEDmLqa.AVTmSleTv |     |     |            |   |   |
| A0A1S3F6W2_DIPOR   | 277 | 293 | USERPAT1 . | . | . |

sEEDmLqa.AVTmSleTv

|                                            |     |            |   |   |
|--------------------------------------------|-----|------------|---|---|
| A0A1S3PLF1_SALSA 663<br>nDEEmLaa.VLEmSrQDa | 679 | USERPAT1 . | . | . |
| A0A1S3PLF1_SALSA 663<br>nDEEmLaa.VLEmSrQDa | 679 | USERPAT1 . | . | . |
| A0A1S3PLF1_SALSA 663<br>nDEEmLaa.VLEmSrQDa | 679 | USERPAT1 . | . | . |
| A0A1S3PME2_SALSA 681<br>nDEEmLaa.VLEmSrQDa | 697 | USERPAT1 . | . | . |
| A0A1S3PME2_SALSA 681<br>nDEEmLaa.VLEmSrQDa | 697 | USERPAT1 . | . | . |
| A0A1S3PME2_SALSA 681<br>nDEEmLaa.VLEmSrQDa | 697 | USERPAT1 . | . | . |
| A0A1S3W742_ERIEU 198<br>tEDEaLqr.ALElSleEt | 214 | USERPAT1 . | . | . |
| A0A1S3W887_ERIEU 198<br>tEDEaLqr.ALElSleEt | 214 | USERPAT1 . | . | . |
| A0A1S3WIT1_ERIEU 279<br>sEEDmLra.AVTlSleTv | 295 | USERPAT1 . | . | . |
| A0A1S3WIT1_ERIEU 279<br>sEEDmLra.AVTlSleTv | 295 | USERPAT1 . | . | . |
| A0A1S3WIT1_ERIEU 279<br>sEEDmLra.AVTlSleTv | 295 | USERPAT1 . | . | . |
| A0A1U7Q4D3_MESAU 123<br>tDEEqAisrVLEaSiaEn | 140 | USERPAT1 . | . | . |
| A0A1U7Q4D3_MESAU 123<br>tDEEqAisrVLEaSiaEn | 140 | USERPAT1 . | . | . |
| A0A1U7SIU1_ALLSI 721<br>sEDElLaa.VLEiSkrEa | 737 | USERPAT1 . | . | . |
| A0A1U7SIU1_ALLSI 721<br>sEDElLaa.VLEiSkrEa | 737 | USERPAT1 . | . | . |
| A0A1U7SIU1_ALLSI 721<br>sEDElLaa.VLEiSkrEa | 737 | USERPAT1 . | . | . |
| A0A1U7TKV6_TARSY 704<br>sEEEllaa.VLEiSkrEa | 720 | USERPAT1 . | . | . |
| A0A1U7TKV6_TARSY 704<br>sEEEllaa.VLEiSkrEa | 720 | USERPAT1 . | . | . |
| A0A1U7TKV6_TARSY 704<br>sEEEllaa.VLEiSkrEa | 720 | USERPAT1 . | . | . |
| A0A1V2L4I6_CYBFA 259<br>dDDEdLkk.ALElSlqEs | 275 | USERPAT1 . | . | . |
| A0A1V2L4I6_CYBFA 259<br>dDDEdLkk.ALElSlqEs | 275 | USERPAT1 . | . | . |
| A0A1V4K6A6_PATFA 714                       | 730 | USERPAT1 . | . | . |

|                                                 |     |            |   |   |
|-------------------------------------------------|-----|------------|---|---|
| sEDELlLaa.VLEiSkrEa<br>A0A1V4K6A6_PATFA 714     | 730 | USERPAT1 . | . | . |
| sEDELlLaa.VLEiSkrEa<br>A0A1V4K6A6_PATFA 714     | 730 | USERPAT1 . | . | . |
| sEDELlLaa.VLEiSkrEa<br><br>A0A1X2GN42_9FUNG 291 | 307 | USERPAT1 . | . | . |
| dEEELqr.ALEmSmnDn<br>A0A1X2GN42_9FUNG 291       | 307 | USERPAT1 . | . | . |
| dEEELqr.ALEmSmnDn<br>A0A1X2GN42_9FUNG 291       | 307 | USERPAT1 . | . | . |
| dEEELqr.ALEmSmnDn<br><br>A0A218VAT4_9PASE 123   | 140 | USERPAT1 . | . | . |
| tDEEqAisrVLEaSiaEn<br>A0A218VAT4_9PASE 123      | 140 | USERPAT1 . | . | . |
| tDEEqAisrVLEaSiaEn<br><br>A0A218VCA6_9PASE 570  | 586 | USERPAT1 . | . | . |
| sEDELlLaa.VLEiSkrEa<br>A0A218VCA6_9PASE 570     | 586 | USERPAT1 . | . | . |
| sEDELlLaa.VLEiSkrEa<br>A0A218VCA6_9PASE 570     | 586 | USERPAT1 . | . | . |
| sEDELlLaa.VLEiSkrEa<br><br>A0A226N991_CALSU 121 | 138 | USERPAT1 . | . | . |
| tDEEqAisrVLEaSiaEn<br>A0A226N991_CALSU 121      | 138 | USERPAT1 . | . | . |
| tDEEqAisrVLEaSiaEn<br><br>A0A226NN36_CALSU 581  | 597 | USERPAT1 . | . | . |
| sEDELlLaa.VLEiSkrEa<br>A0A226NN36_CALSU 581     | 597 | USERPAT1 . | . | . |
| sEDELlLaa.VLEiSkrEa<br>A0A226NN36_CALSU 581     | 597 | USERPAT1 . | . | . |
| sEDELlLaa.VLEiSkrEa<br><br>A0A226PAP4_COLVI 407 | 423 | USERPAT1 . | . | . |
| sEDELlLaa.VLEiSkrEa<br>A0A226PAP4_COLVI 407     | 423 | USERPAT1 . | . | . |
| sEDELlLaa.VLEiSkrEa<br>A0A226PAP4_COLVI 407     | 423 | USERPAT1 . | . | . |
| sEDELlLaa.VLEiSkrEa<br><br>A0A286XUX8_CAVPO 684 | 700 | USERPAT1 . | . | . |
| nEEELlLaa.VLEiSkrEa<br>A0A286XUX8_CAVPO 684     | 700 | USERPAT1 . | . | . |
| nEEELlLaa.VLEiSkrEa<br>A0A286XUX8_CAVPO 684     | 700 | USERPAT1 . | . | . |
| nEEELlLaa.VLEiSkrEa<br><br>A0A286Y2A8_CAVPO 123 | 140 | USERPAT1 . | . | . |
| tDEEqAisrVLEaSiaEn<br>A0A286Y2A8_CAVPO 123      | 140 | USERPAT1 . | . | . |

tDEEqAisrVLEaSiaEn

|                                             |     |            |   |   |
|---------------------------------------------|-----|------------|---|---|
| A0A286ZIIY3_PIG 683<br>sEEElLaa.VLEiSkrEa   | 699 | USERPAT1 . | . | . |
| A0A286ZIIY3_PIG 683<br>sEEElLaa.VLEiSkrEa   | 699 | USERPAT1 . | . | . |
| A0A286ZIIY3_PIG 683<br>sEEElLaa.VLEiSkrEa   | 699 | USERPAT1 . | . | . |
| A0A287AIIY3_PIG 595<br>sEEElLaa.VLEiSkrEa   | 611 | USERPAT1 . | . | . |
| A0A287AIIY3_PIG 595<br>sEEElLaa.VLEiSkrEa   | 611 | USERPAT1 . | . | . |
| A0A287AIIY3_PIG 595<br>sEEElLaa.VLEiSkrEa   | 611 | USERPAT1 . | . | . |
| A0A2B4RED8_STYPI 12<br>eDEDeAlakALElSslEq   | 29  | USERPAT1 . | . | . |
| A0A2C9F3C4_PIG 705<br>sEEElLaa.VLEiSkrEa    | 721 | USERPAT1 . | . | . |
| A0A2C9F3C4_PIG 705<br>sEEElLaa.VLEiSkrEa    | 721 | USERPAT1 . | . | . |
| A0A2C9F3C4_PIG 705<br>sEEElLaa.VLEiSkrEa    | 721 | USERPAT1 . | . | . |
| A0A2C9JDB1_BIOGL 563<br>rEEEdFqm.VLElSrrEq  | 579 | USERPAT1 . | . | . |
| A0A2C9JDB1_BIOGL 563<br>rEEEdFqm.VLElSrrEq  | 579 | USERPAT1 . | . | . |
| A0A2C9JDB1_BIOGL 563<br>rEEEdFqm.VLElSrrEq  | 579 | USERPAT1 . | . | . |
| A0A2C9JKV6_BIOGL 270<br>vDEEmLer.ALGaSlNpd  | 286 | USERPAT1 . | . | . |
| A0A2C9JKV6_BIOGL 270<br>vDEEmLer.ALGaSlNpd  | 286 | USERPAT1 . | . | . |
| A0A2C9JKV6_BIOGL 270<br>vDEEmLer.ALGaSlNpd  | 286 | USERPAT1 . | . | . |
| A0A2D0R3W6_ICTPU 674<br>nDDEmLaa.VLEmSrqDa  | 690 | USERPAT1 . | . | . |
| A0A2D0R3W6_ICTPU 674<br>nDDEmLaa.VLEmSrqDa  | 690 | USERPAT1 . | . | . |
| A0A2D0R3W6_ICTPU 674<br>nDDEmLaa.VLEmSrqDa  | 690 | USERPAT1 . | . | . |
| A0A2I0LKF1_COLLII 714<br>sEDElLaa.VLEiSkrEa | 730 | USERPAT1 . | . | . |
| A0A2I0LKF1_COLLII 714<br>sEDElLaa.VLEiSkrEa | 730 | USERPAT1 . | . | . |
| A0A2I0LKF1_COLLII 714<br>sEDElLaa.VLEiSkrEa | 730 | USERPAT1 . | . | . |

|                      |     |            |   |   |
|----------------------|-----|------------|---|---|
| A0A2I0MS83_COLLI 194 | 211 | USERPAT1 . | . | . |
| tDEEqAisrVLEaSiaEn   |     |            |   |   |
| A0A2I0MS83_COLLI 194 | 211 | USERPAT1 . | . | . |
| tDEEqAisrVLEaSiaEn   |     |            |   |   |
| A0A2I2UUV1_FELCA 123 | 140 | USERPAT1 . | . | . |
| tDEEqAisrVLEaSiaEn   |     |            |   |   |
| A0A2I2UUV1_FELCA 123 | 140 | USERPAT1 . | . | . |
| tDEEqAisrVLEaSiaEn   |     |            |   |   |
| A0A2I2Y2A1_GORGO 123 | 140 | USERPAT1 . | . | . |
| tDEEqAisrVLEaSiaEn   |     |            |   |   |
| A0A2I2Y2A1_GORGO 123 | 140 | USERPAT1 . | . | . |
| tDEEqAisrVLEaSiaEn   |     |            |   |   |
| A0A2I2Y7T6_GORGO 316 | 332 | USERPAT1 . | . | . |
| sEEDmLqa.AVTmSleTv   |     |            |   |   |
| A0A2I2Y7T6_GORGO 316 | 332 | USERPAT1 . | . | . |
| sEEDmLqa.AVTmSleTv   |     |            |   |   |
| A0A2I2Y7T6_GORGO 316 | 332 | USERPAT1 . | . | . |
| sEEDmLqa.AVTmSleTv   |     |            |   |   |
| A0A2I2YBD4_GORGO 116 | 133 | USERPAT1 . | . | . |
| tDEEqAisrVLEaSiaEn   |     |            |   |   |
| A0A2I2YBD4_GORGO 116 | 133 | USERPAT1 . | . | . |
| tDEEqAisrVLEaSiaEn   |     |            |   |   |
| A0A2I2YJG1_GORGO 331 | 347 | USERPAT1 . | . | . |
| sEEDmLqa.AVTmSleTv   |     |            |   |   |
| A0A2I2YJG1_GORGO 331 | 347 | USERPAT1 . | . | . |
| sEEDmLqa.AVTmSleTv   |     |            |   |   |
| A0A2I2YJG1_GORGO 331 | 347 | USERPAT1 . | . | . |
| sEEDmLqa.AVTmSleTv   |     |            |   |   |
| A0A2I2YSI6_GORGO 340 | 356 | USERPAT1 . | . | . |
| sEEDmLqa.AVTmSleTv   |     |            |   |   |
| A0A2I2YSI6_GORGO 340 | 356 | USERPAT1 . | . | . |
| sEEDmLqa.AVTmSleTv   |     |            |   |   |
| A0A2I2YSI6_GORGO 340 | 356 | USERPAT1 . | . | . |
| sEEDmLqa.AVTmSleTv   |     |            |   |   |
| A0A2I2YVJ0_GORGO 123 | 140 | USERPAT1 . | . | . |
| tDEEqAisrVLEaSiaEn   |     |            |   |   |
| A0A2I2YVJ0_GORGO 123 | 140 | USERPAT1 . | . | . |
| tDEEqAisrVLEaSiaEn   |     |            |   |   |
| A0A2I2Z4Q3_GORGO 123 | 140 | USERPAT1 . | . | . |
| tDEEqAisrVLEaSiaEn   |     |            |   |   |
| A0A2I2Z4Q3_GORGO 123 | 140 | USERPAT1 . | . | . |
| tDEEqAisrVLEaSiaEn   |     |            |   |   |
| A0A2I2ZD42_GORGO 116 | 133 | USERPAT1 . | . | . |
| tDEEqAisrVLEaSiaEn   |     |            |   |   |
| A0A2I2ZD42_GORGO 116 | 133 | USERPAT1 . | . | . |

tDEEqAisrVLEaSiaEn

|                                            |     |            |   |   |
|--------------------------------------------|-----|------------|---|---|
| A0A2I2ZJ77_GORGO 280<br>sEEDmLqa.AVTmSleTv | 296 | USERPAT1 . | . | . |
| A0A2I2ZJ77_GORGO 280<br>sEEDmLqa.AVTmSleTv | 296 | USERPAT1 . | . | . |
| A0A2I2ZJ77_GORGO 280<br>sEEDmLqa.AVTmSleTv | 296 | USERPAT1 . | . | . |
| A0A2I2ZV90_GORGO 704<br>sEEElLaa.VLEiSkrDa | 720 | USERPAT1 . | . | . |
| A0A2I2ZV90_GORGO 704<br>sEEElLaa.VLEiSkrDa | 720 | USERPAT1 . | . | . |
| A0A2I3FVD2_NOMLE 123<br>tDEEqAisrVLEaSiaEn | 140 | USERPAT1 . | . | . |
| A0A2I3FVD2_NOMLE 123<br>tDEEqAisrVLEaSiaEn | 140 | USERPAT1 . | . | . |
| A0A2I3G3E4_NOMLE 265<br>sEEDmLqa.AVTmSleTv | 281 | USERPAT1 . | . | . |
| A0A2I3G3E4_NOMLE 265<br>sEEDmLqa.AVTmSleTv | 281 | USERPAT1 . | . | . |
| A0A2I3G3E4_NOMLE 265<br>sEEDmLqa.AVTmSleTv | 281 | USERPAT1 . | . | . |
| A0A2I3GEZ4_NOMLE 320<br>sEEDmLqa.AVTmSleTv | 336 | USERPAT1 . | . | . |
| A0A2I3GEZ4_NOMLE 320<br>sEEDmLqa.AVTmSleTv | 336 | USERPAT1 . | . | . |
| A0A2I3GEZ4_NOMLE 320<br>sEEDmLqa.AVTmSleTv | 336 | USERPAT1 . | . | . |
| A0A2I3GGH3_NOMLE 123<br>tDEEqAisrVLEaSiaEn | 140 | USERPAT1 . | . | . |
| A0A2I3GGH3_NOMLE 123<br>tDEEqAisrVLEaSiaEn | 140 | USERPAT1 . | . | . |
| A0A2I3GHK3_NOMLE 305<br>sEEDmLqa.AVTmSleTv | 321 | USERPAT1 . | . | . |
| A0A2I3GHK3_NOMLE 305<br>sEEDmLqa.AVTmSleTv | 321 | USERPAT1 . | . | . |
| A0A2I3GHK3_NOMLE 305<br>sEEDmLqa.AVTmSleTv | 321 | USERPAT1 . | . | . |
| A0A2I3H427_NOMLE 268<br>sEEDmLqa.AVTmSleTv | 284 | USERPAT1 . | . | . |
| A0A2I3H427_NOMLE 268<br>sEEDmLqa.AVTmSleTv | 284 | USERPAT1 . | . | . |
| A0A2I3H427_NOMLE 268<br>sEEDmLqa.AVTmSleTv | 284 | USERPAT1 . | . | . |
| A0A2I3HII5_NOMLE 123<br>tDEEqAisrVLEaSiaEn | 140 | USERPAT1 . | . | . |

|                                            |     |            |   |   |
|--------------------------------------------|-----|------------|---|---|
| A0A2I3HII5_NOMLE 123<br>tDEEqAisrVLEaSiaEn | 140 | USERPAT1 . | . | . |
| A0A2I3HL68_NOMLE 706<br>sEEElLaa.VLEiSkrDa | 722 | USERPAT1 . | . | . |
| A0A2I3HL68_NOMLE 706<br>sEEElLaa.VLEiSkrDa | 722 | USERPAT1 . | . | . |
| A0A2I3HS80_NOMLE 329<br>sEEDmLqa.AVTmSleTv | 345 | USERPAT1 . | . | . |
| A0A2I3HS80_NOMLE 329<br>sEEDmLqa.AVTmSleTv | 345 | USERPAT1 . | . | . |
| A0A2I3HS80_NOMLE 329<br>sEEDmLqa.AVTmSleTv | 345 | USERPAT1 . | . | . |
| A0A2I3HTW1_NOMLE 612<br>sEEElLaa.VLEiSkrDa | 628 | USERPAT1 . | . | . |
| A0A2I3HTW1_NOMLE 612<br>sEEElLaa.VLEiSkrDa | 628 | USERPAT1 . | . | . |
| A0A2I3LC42_PAPAN 611<br>sEEElLaa.VLEiSkrDa | 627 | USERPAT1 . | . | . |
| A0A2I3LC42_PAPAN 611<br>sEEElLaa.VLEiSkrDa | 627 | USERPAT1 . | . | . |
| A0A2I3LQ44_PAPAN 123<br>tDEEqAisrVLEaSiaEn | 140 | USERPAT1 . | . | . |
| A0A2I3LQ44_PAPAN 123<br>tDEEqAisrVLEaSiaEn | 140 | USERPAT1 . | . | . |
| A0A2I3MAN5_PAPAN 340<br>gEEDmLqa.AVTmSleTv | 356 | USERPAT1 . | . | . |
| A0A2I3MAN5_PAPAN 340<br>gEEDmLqa.AVTmSleTv | 356 | USERPAT1 . | . | . |
| A0A2I3MAN5_PAPAN 340<br>gEEDmLqa.AVTmSleTv | 356 | USERPAT1 . | . | . |
| A0A2I3MIB0_PAPAN 116<br>tDEEqAisrVLEaSiaEn | 133 | USERPAT1 . | . | . |
| A0A2I3MIB0_PAPAN 116<br>tDEEqAisrVLEaSiaEn | 133 | USERPAT1 . | . | . |
| A0A2I3MVB2_PAPAN 326<br>gEEDmLqa.AVTmSleTv | 342 | USERPAT1 . | . | . |
| A0A2I3MVB2_PAPAN 326<br>gEEDmLqa.AVTmSleTv | 342 | USERPAT1 . | . | . |
| A0A2I3MVB2_PAPAN 326<br>gEEDmLqa.AVTmSleTv | 342 | USERPAT1 . | . | . |
| A0A2I3MY00_PAPAN 123<br>tDEEqAisrVLEaSiaEn | 140 | USERPAT1 . | . | . |
| A0A2I3MY00_PAPAN 123<br>tDEEqAisrVLEaSiaEn | 140 | USERPAT1 . | . | . |

|                      |     |            |   |   |
|----------------------|-----|------------|---|---|
| A0A2I3RD20_PANTR 324 | 340 | USERPAT1 . | . | . |
| sEEDmLqa.AVTmSleTv   |     |            |   |   |
| A0A2I3RD20_PANTR 324 | 340 | USERPAT1 . | . | . |
| sEEDmLqa.AVTmSleTv   |     |            |   |   |
| A0A2I3RD20_PANTR 324 | 340 | USERPAT1 . | . | . |
| sEEDmLqa.AVTmSleTv   |     |            |   |   |
| A0A2I3RF30_PANTR 123 | 140 | USERPAT1 . | . | . |
| tDEEqAisrVLEaSiaEn   |     |            |   |   |
| A0A2I3RF30_PANTR 123 | 140 | USERPAT1 . | . | . |
| tDEEqAisrVLEaSiaEn   |     |            |   |   |
| A0A2I3RW24_PANTR 123 | 140 | USERPAT1 . | . | . |
| tDEEqAisrVLEaSiaEn   |     |            |   |   |
| A0A2I3RW24_PANTR 123 | 140 | USERPAT1 . | . | . |
| tDEEqAisrVLEaSiaEn   |     |            |   |   |
| A0A2I3S0Z0_PANTR 323 | 339 | USERPAT1 . | . | . |
| sEEDmLqa.AVTmSleTv   |     |            |   |   |
| A0A2I3S0Z0_PANTR 323 | 339 | USERPAT1 . | . | . |
| sEEDmLqa.AVTmSleTv   |     |            |   |   |
| A0A2I3S0Z0_PANTR 323 | 339 | USERPAT1 . | . | . |
| sEEDmLqa.AVTmSleTv   |     |            |   |   |
| A0A2I3S1H4_PANTR 610 | 626 | USERPAT1 . | . | . |
| sEEElLaa.VLEiSkrDa   |     |            |   |   |
| A0A2I3S1H4_PANTR 610 | 626 | USERPAT1 . | . | . |
| sEEElLaa.VLEiSkrDa   |     |            |   |   |
| A0A2I3SC06_PANTR 123 | 140 | USERPAT1 . | . | . |
| tDEEqAisrVLEaSiaEn   |     |            |   |   |
| A0A2I3SC06_PANTR 123 | 140 | USERPAT1 . | . | . |
| tDEEqAisrVLEaSiaEn   |     |            |   |   |
| A0A2I3TCN4_PANTR 288 | 304 | USERPAT1 . | . | . |
| sEEDmLqa.AVTmSleTv   |     |            |   |   |
| A0A2I3TCN4_PANTR 288 | 304 | USERPAT1 . | . | . |
| sEEDmLqa.AVTmSleTv   |     |            |   |   |
| A0A2I3TCN4_PANTR 288 | 304 | USERPAT1 . | . | . |
| sEEDmLqa.AVTmSleTv   |     |            |   |   |
| A0A2I3TPK5_PANTR 123 | 140 | USERPAT1 . | . | . |
| tDEEqAisrVLEaSiaEn   |     |            |   |   |
| A0A2I3TPK5_PANTR 123 | 140 | USERPAT1 . | . | . |
| tDEEqAisrVLEaSiaEn   |     |            |   |   |
| A0A2I3TRW8_PANTR 269 | 285 | USERPAT1 . | . | . |
| sEEDmLqa.AVTmSleTv   |     |            |   |   |
| A0A2I3TRW8_PANTR 269 | 285 | USERPAT1 . | . | . |
| sEEDmLqa.AVTmSleTv   |     |            |   |   |
| A0A2I3TRW8_PANTR 269 | 285 | USERPAT1 . | . | . |
| sEEDmLqa.AVTmSleTv   |     |            |   |   |
| A0A2I3TWP0_PANTR 704 | 720 | USERPAT1 . | . | . |



|                                                                                            |      |            |   |   |
|--------------------------------------------------------------------------------------------|------|------------|---|---|
| sEEElLaa.VLEiSkrDa<br>A0A2I3TWP0_PANTR 704<br>sEEElLaa.VLEiSkrDa                           | 720  | USERPAT1 . | . | . |
| A0A2I3TX18_PANTR 284<br>sEEDmLqa.AVTmSleTv<br>A0A2I3TX18_PANTR 284<br>sEEDmLqa.AVTmSleTv   | 300  | USERPAT1 . | . | . |
| A0A2I3TX18_PANTR 284<br>sEEDmLqa.AVTmSleTv<br>A0A2I3TX18_PANTR 284<br>sEEDmLqa.AVTmSleTv   | 300  | USERPAT1 . | . | . |
| A0A2I3TX18_PANTR 284<br>sEEDmLqa.AVTmSleTv                                                 | 300  | USERPAT1 . | . | . |
| A0A2I4BZG2_9TELE 681<br>nDDEmMaa.VLEmSrqEa<br>A0A2I4BZG2_9TELE 681<br>nDDEmMaa.VLEmSrqEa   | 697  | USERPAT1 . | . | . |
| A0A2I4BZG2_9TELE 681<br>nDDEmMaa.VLEmSrqEa<br>A0A2I4BZG2_9TELE 681<br>nDDEmMaa.VLEmSrqEa   | 697  | USERPAT1 . | . | . |
| A0A2I4BZG2_9TELE 681<br>nDDEmMaa.VLEmSrqEa                                                 | 697  | USERPAT1 . | . | . |
| A0A2I4BZG3_9TELE 680<br>nDDEmMaa.VLEmSrqEa<br>A0A2I4BZG3_9TELE 680<br>nDDEmMaa.VLEmSrqEa   | 696  | USERPAT1 . | . | . |
| A0A2I4BZG3_9TELE 680<br>nDDEmMaa.VLEmSrqEa<br>A0A2I4BZG3_9TELE 680<br>nDDEmMaa.VLEmSrqEa   | 696  | USERPAT1 . | . | . |
| A0A2I4BZG3_9TELE 680<br>nDDEmMaa.VLEmSrqEa                                                 | 696  | USERPAT1 . | . | . |
| A0A2J8EJY0_VERDA 1167<br>dDDEdFkr.ALEaSkIPs<br>A0A2J8EJY0_VERDA 1167<br>dDDEdFkr.ALEaSkIPs | 1183 | USERPAT1 . | . | . |
| A0A2J8EJY0_VERDA 1167<br>dDDEdFkr.ALEaSkIPs<br>A0A2J8EJY0_VERDA 1167<br>dDDEdFkr.ALEaSkIPs | 1183 | USERPAT1 . | . | . |
| A0A2J8EJY0_VERDA 1167<br>dDDEdFkr.ALEaSkIPs<br>A0A2J8EJY0_VERDA 1167<br>dDDEdFkr.ALEaSkIPs | 1183 | USERPAT1 . | . | . |
| A0A2J8EJY0_VERDA 1167<br>dDDEdFkr.ALEaSkIPs                                                | 1183 | USERPAT1 . | . | . |
| A0A2K1XR5_POPTN 122<br>vEDDeFar.ALElSlkTa<br>A0A2K1XR5_POPTN 122<br>vEDDeFar.ALElSlkTa     | 138  | USERPAT1 . | . | . |
| A0A2K1XR5_POPTN 122<br>vEDDeFar.ALElSlkTa                                                  | 138  | USERPAT1 . | . | . |
| A0A2K1XRY2_POPTN 190<br>vEDDeFar.ALElSlkTa<br>A0A2K1XRY2_POPTN 190<br>vEDDeFar.ALElSlkTa   | 206  | USERPAT1 . | . | . |
| A0A2K1XRY2_POPTN 190<br>vEDDeFar.ALElSlkTa                                                 | 206  | USERPAT1 . | . | . |
| A0A2K1XRY3_POPTN 190<br>vEDDeFar.ALElSlkTa<br>A0A2K1XRY3_POPTN 190<br>vEDDeFar.ALElSlkTa   | 206  | USERPAT1 . | . | . |
| A0A2K1XRY3_POPTN 190<br>vEDDeFar.ALElSlkTa                                                 | 206  | USERPAT1 . | . | . |
| A0A2K2DCV4_BRADI 66<br>dDDDnLqa.ALEaSkeEt<br>A0A2K2DCV4_BRADI 66<br>dDDDnLqa.ALEaSkeEt     | 82   | USERPAT1 . | . | . |
| A0A2K2DCV4_BRADI 66<br>dDDDnLqa.ALEaSkeEt<br>A0A2K2DCV4_BRADI 66<br>dDDDnLqa.ALEaSkeEt     | 82   | USERPAT1 . | . | . |
| A0A2K2DCV4_BRADI 66<br>dDDDnLqa.ALEaSkeEt                                                  | 82   | USERPAT1 . | . | . |

|                                            |     |            |   |   |
|--------------------------------------------|-----|------------|---|---|
| dDDnLqa.ALEaSkeEt<br>A0A2K2DCV4_BRADI 116  | 132 | USERPAT1 . | . | . |
| eEEDdLqa.ALEtSkeEi<br>A0A2K2DCV4_BRADI 116 | 132 | USERPAT1 . | . | . |
| eEEDdLqa.ALEtSkeEi<br>A0A2K2DCV4_BRADI 116 | 132 | USERPAT1 . | . | . |
| eEEDdLqa.ALEtSkeEi<br>A0A2K2DCV4_BRADI 116 | 132 | USERPAT1 . | . | . |
| A0A2K5DCH2_AOTNA 123<br>tDEEqAisrVLEaSiaEn | 140 | USERPAT1 . | . | . |
| A0A2K5DCH2_AOTNA 123<br>tDEEqAisrVLEaSiaEn | 140 | USERPAT1 . | . | . |
| A0A2K5DCJ1_AOTNA 123<br>tDEEqAisrVLEaSiaEn | 140 | USERPAT1 . | . | . |
| A0A2K5DCJ1_AOTNA 123<br>tDEEqAisrVLEaSiaEn | 140 | USERPAT1 . | . | . |
| A0A2K5DCJ3_AOTNA 123<br>tDEEqAisrVLEaSiaEn | 140 | USERPAT1 . | . | . |
| A0A2K5DCJ3_AOTNA 123<br>tDEEqAisrVLEaSiaEn | 140 | USERPAT1 . | . | . |
| A0A2K5DCK2_AOTNA 123<br>tDEEqAisrVLEaSiaEn | 140 | USERPAT1 . | . | . |
| A0A2K5DCK2_AOTNA 123<br>tDEEqAisrVLEaSiaEn | 140 | USERPAT1 . | . | . |
| A0A2K5DCK7_AOTNA 119<br>tDEEqAisrVLEaSiaEn | 136 | USERPAT1 . | . | . |
| A0A2K5DCK7_AOTNA 119<br>tDEEqAisrVLEaSiaEn | 136 | USERPAT1 . | . | . |
| A0A2K5E0F1_AOTNA 300<br>sEEDmLqa.AVTmSleTv | 316 | USERPAT1 . | . | . |
| A0A2K5E0F1_AOTNA 300<br>sEEDmLqa.AVTmSleTv | 316 | USERPAT1 . | . | . |
| A0A2K5E0F1_AOTNA 300<br>sEEDmLqa.AVTmSleTv | 316 | USERPAT1 . | . | . |
| A0A2K5E0J7_AOTNA 279<br>sEEDmLqa.AVTmSleTv | 295 | USERPAT1 . | . | . |
| A0A2K5E0J7_AOTNA 279<br>sEEDmLqa.AVTmSleTv | 295 | USERPAT1 . | . | . |
| A0A2K5E0J7_AOTNA 279<br>sEEDmLqa.AVTmSleTv | 295 | USERPAT1 . | . | . |
| A0A2K5E0K4_AOTNA 239<br>sEEDmLqa.AVTmSleTv | 255 | USERPAT1 . | . | . |
| A0A2K5E0K4_AOTNA 239<br>sEEDmLqa.AVTmSleTv | 255 | USERPAT1 . | . | . |
| A0A2K5E0K4_AOTNA 239<br>sEEDmLqa.AVTmSleTv | 255 | USERPAT1 . | . | . |

|                      |     |            |   |   |
|----------------------|-----|------------|---|---|
| A0A2K5E0M2_AOTNA 243 | 259 | USERPAT1 . | . | . |
| sEEDmLqa.AVTmSleTv   |     |            |   |   |
| A0A2K5E0M2_AOTNA 243 | 259 | USERPAT1 . | . | . |
| sEEDmLqa.AVTmSleTv   |     |            |   |   |
| A0A2K5E0M2_AOTNA 243 | 259 | USERPAT1 . | . | . |
| sEEDmLqa.AVTmSleTv   |     |            |   |   |
| A0A2K5E0Q9_AOTNA 224 | 240 | USERPAT1 . | . | . |
| sEEDmLqa.AVTmSleTv   |     |            |   |   |
| A0A2K5E0Q9_AOTNA 224 | 240 | USERPAT1 . | . | . |
| sEEDmLqa.AVTmSleTv   |     |            |   |   |
| A0A2K5E0Q9_AOTNA 224 | 240 | USERPAT1 . | . | . |
| sEEDmLqa.AVTmSleTv   |     |            |   |   |
| A0A2K5E0S1_AOTNA 294 | 310 | USERPAT1 . | . | . |
| sEEDmLqa.AVTmSleTv   |     |            |   |   |
| A0A2K5E0S1_AOTNA 294 | 310 | USERPAT1 . | . | . |
| sEEDmLqa.AVTmSleTv   |     |            |   |   |
| A0A2K5E0S1_AOTNA 294 | 310 | USERPAT1 . | . | . |
| sEEDmLqa.AVTmSleTv   |     |            |   |   |
| A0A2K5E4H2_AOTNA 705 | 721 | USERPAT1 . | . | . |
| sEEEvLaa.VLEiSkrEa   |     |            |   |   |
| A0A2K5E4H2_AOTNA 705 | 721 | USERPAT1 . | . | . |
| sEEEvLaa.VLEiSkrEa   |     |            |   |   |
| A0A2K5E4H2_AOTNA 705 | 721 | USERPAT1 . | . | . |
| sEEEvLaa.VLEiSkrEa   |     |            |   |   |
| A0A2K5E4T1_AOTNA 611 | 627 | USERPAT1 . | . | . |
| sEEEvLaa.VLEiSkrEa   |     |            |   |   |
| A0A2K5E4T1_AOTNA 611 | 627 | USERPAT1 . | . | . |
| sEEEvLaa.VLEiSkrEa   |     |            |   |   |
| A0A2K5E4T1_AOTNA 611 | 627 | USERPAT1 . | . | . |
| sEEEvLaa.VLEiSkrEa   |     |            |   |   |
| A0A2K5HP42_COLAP 278 | 294 | USERPAT1 . | . | . |
| gEEDmLqa.AVTmSleTv   |     |            |   |   |
| A0A2K5HP42_COLAP 278 | 294 | USERPAT1 . | . | . |
| gEEDmLqa.AVTmSleTv   |     |            |   |   |
| A0A2K5HP42_COLAP 278 | 294 | USERPAT1 . | . | . |
| gEEDmLqa.AVTmSleTv   |     |            |   |   |
| A0A2K5HP48_COLAP 293 | 309 | USERPAT1 . | . | . |
| gEEDmLqa.AVTmSleTv   |     |            |   |   |
| A0A2K5HP48_COLAP 293 | 309 | USERPAT1 . | . | . |
| gEEDmLqa.AVTmSleTv   |     |            |   |   |
| A0A2K5HP48_COLAP 293 | 309 | USERPAT1 . | . | . |
| gEEDmLqa.AVTmSleTv   |     |            |   |   |
| A0A2K5HP53_COLAP 242 | 258 | USERPAT1 . | . | . |
| gEEDmLqa.AVTmSleTv   |     |            |   |   |
| A0A2K5HP53_COLAP 242 | 258 | USERPAT1 . | . | . |
| gEEDmLqa.AVTmSleTv   |     |            |   |   |
| A0A2K5HP53_COLAP 242 | 258 | USERPAT1 . | . | . |

gEEDmLqa.AVTmSleTv

|                      |     |            |   |   |
|----------------------|-----|------------|---|---|
| A0A2K5HP85_COLAP 285 | 301 | USERPAT1 . | . | . |
| gEEDmLqa.AVTmSleTv   |     |            |   |   |
| A0A2K5HP85_COLAP 285 | 301 | USERPAT1 . | . | . |
| gEEDmLqa.AVTmSleTv   |     |            |   |   |
| A0A2K5HP85_COLAP 285 | 301 | USERPAT1 . | . | . |
| gEEDmLqa.AVTmSleTv   |     |            |   |   |
| A0A2K5HPV2_COLAP 706 | 722 | USERPAT1 . | . | . |
| sEEElLaa.VLEiSkrDa   |     |            |   |   |
| A0A2K5HPV2_COLAP 706 | 722 | USERPAT1 . | . | . |
| sEEElLaa.VLEiSkrDa   |     |            |   |   |
| A0A2K5HPW3_COLAP 612 | 628 | USERPAT1 . | . | . |
| sEEElLaa.VLEiSkrDa   |     |            |   |   |
| A0A2K5HPW3_COLAP 612 | 628 | USERPAT1 . | . | . |
| sEEElLaa.VLEiSkrDa   |     |            |   |   |
| A0A2K5J3H9_COLAP 120 | 137 | USERPAT1 . | . | . |
| tDEEqAisrVLEaSiaEn   |     |            |   |   |
| A0A2K5J3H9_COLAP 120 | 137 | USERPAT1 . | . | . |
| tDEEqAisrVLEaSiaEn   |     |            |   |   |
| A0A2K5J3K2_COLAP 120 | 137 | USERPAT1 . | . | . |
| tDEEqAisrVLEaSiaEn   |     |            |   |   |
| A0A2K5J3K2_COLAP 120 | 137 | USERPAT1 . | . | . |
| tDEEqAisrVLEaSiaEn   |     |            |   |   |
| A0A2K5J3K7_COLAP 108 | 125 | USERPAT1 . | . | . |
| tDEEqAisrVLEaSiaEn   |     |            |   |   |
| A0A2K5J3K7_COLAP 108 | 125 | USERPAT1 . | . | . |
| tDEEqAisrVLEaSiaEn   |     |            |   |   |
| A0A2K5J3L2_COLAP 108 | 125 | USERPAT1 . | . | . |
| tDEEqAisrVLEaSiaEn   |     |            |   |   |
| A0A2K5J3L2_COLAP 108 | 125 | USERPAT1 . | . | . |
| tDEEqAisrVLEaSiaEn   |     |            |   |   |
| A0A2K5KGJ4_COLAP 329 | 345 | USERPAT1 . | . | . |
| gEEDmLqa.AVTtSleTv   |     |            |   |   |
| A0A2K5KGJ4_COLAP 329 | 345 | USERPAT1 . | . | . |
| gEEDmLqa.AVTtSleTv   |     |            |   |   |
| A0A2K5KGJ4_COLAP 329 | 345 | USERPAT1 . | . | . |
| gEEDmLqa.AVTtSleTv   |     |            |   |   |
| A0A2K5L5F2_CERAT 612 | 628 | USERPAT1 . | . | . |
| sEEElLaa.VLEiSkrDa   |     |            |   |   |
| A0A2K5L5F2_CERAT 612 | 628 | USERPAT1 . | . | . |
| sEEElLaa.VLEiSkrDa   |     |            |   |   |
| A0A2K5L5F4_CERAT 706 | 722 | USERPAT1 . | . | . |
| sEEElLaa.VLEiSkrDa   |     |            |   |   |
| A0A2K5L5F4_CERAT 706 | 722 | USERPAT1 . | . | . |

sEEElLaa.VLEiSkrDa

|                                            |     |            |   |   |
|--------------------------------------------|-----|------------|---|---|
| A0A2K5MRI6_CERAT 339<br>gEEDmLqa.AVTmSleTv | 355 | USERPAT1 . | . | . |
| A0A2K5MRI6_CERAT 339<br>gEEDmLqa.AVTmSleTv | 355 | USERPAT1 . | . | . |
| A0A2K5MRI6_CERAT 339<br>gEEDmLqa.AVTmSleTv | 355 | USERPAT1 . | . | . |
| A0A2K5MRJ5_CERAT 286<br>gEEDmLqa.AVTmSleTv | 302 | USERPAT1 . | . | . |
| A0A2K5MRJ5_CERAT 286<br>gEEDmLqa.AVTmSleTv | 302 | USERPAT1 . | . | . |
| A0A2K5MRJ5_CERAT 286<br>gEEDmLqa.AVTmSleTv | 302 | USERPAT1 . | . | . |
| A0A2K5MRK2_CERAT 282<br>gEEDmLqa.AVTmSleTv | 298 | USERPAT1 . | . | . |
| A0A2K5MRK2_CERAT 282<br>gEEDmLqa.AVTmSleTv | 298 | USERPAT1 . | . | . |
| A0A2K5MRK2_CERAT 282<br>gEEDmLqa.AVTmSleTv | 298 | USERPAT1 . | . | . |
| A0A2K5MRL3_CERAT 337<br>gEEDmLqa.AVTmSleTv | 353 | USERPAT1 . | . | . |
| A0A2K5MRL3_CERAT 337<br>gEEDmLqa.AVTmSleTv | 353 | USERPAT1 . | . | . |
| A0A2K5MRL3_CERAT 337<br>gEEDmLqa.AVTmSleTv | 353 | USERPAT1 . | . | . |
| A0A2K5MRX7_CERAT 322<br>gEEDmLqa.AVTmSleTv | 338 | USERPAT1 . | . | . |
| A0A2K5MRX7_CERAT 322<br>gEEDmLqa.AVTmSleTv | 338 | USERPAT1 . | . | . |
| A0A2K5MRX7_CERAT 322<br>gEEDmLqa.AVTmSleTv | 338 | USERPAT1 . | . | . |
| A0A2K5P5B4_CERAT 123<br>tDEEqAisrVLEaSiaEn | 140 | USERPAT1 . | . | . |
| A0A2K5P5B4_CERAT 123<br>tDEEqAisrVLEaSiaEn | 140 | USERPAT1 . | . | . |
| A0A2K5P5B6_CERAT 123<br>tDEEqAisrVLEaSiaEn | 140 | USERPAT1 . | . | . |
| A0A2K5P5B6_CERAT 123<br>tDEEqAisrVLEaSiaEn | 140 | USERPAT1 . | . | . |
| A0A2K5P5C1_CERAT 123<br>tDEEqAisrVLEaSiaEn | 140 | USERPAT1 . | . | . |
| A0A2K5P5C1_CERAT 123<br>tDEEqAisrVLEaSiaEn | 140 | USERPAT1 . | . | . |
| A0A2K5P5C3_CERAT 123<br>tDEEqAisrVLEaSiaEn | 140 | USERPAT1 . | . | . |

|                                            |     |            |   |   |
|--------------------------------------------|-----|------------|---|---|
| A0A2K5P5C3_CERAT 123<br>tDEEqAisrVLEaSiaEn | 140 | USERPAT1 . | . | . |
| A0A2K5P5D7_CERAT 116<br>tDEEqAisrVLEaSiaEn | 133 | USERPAT1 . | . | . |
| A0A2K5P5D7_CERAT 116<br>tDEEqAisrVLEaSiaEn | 133 | USERPAT1 . | . | . |
| A0A2K5QRZ1_CEBCA 260<br>sEEDmLqa.AVTmSleTv | 276 | USERPAT1 . | . | . |
| A0A2K5QRZ1_CEBCA 260<br>sEEDmLqa.AVTmSleTv | 276 | USERPAT1 . | . | . |
| A0A2K5QRZ1_CEBCA 260<br>sEEDmLqa.AVTmSleTv | 276 | USERPAT1 . | . | . |
| A0A2K5QS50_CEBCA 279<br>sEEDmLqa.AVTmSleTv | 295 | USERPAT1 . | . | . |
| A0A2K5QS50_CEBCA 279<br>sEEDmLqa.AVTmSleTv | 295 | USERPAT1 . | . | . |
| A0A2K5QS50_CEBCA 279<br>sEEDmLqa.AVTmSleTv | 295 | USERPAT1 . | . | . |
| A0A2K5QS64_CEBCA 243<br>sEEDmLqa.AVTmSleTv | 259 | USERPAT1 . | . | . |
| A0A2K5QS64_CEBCA 243<br>sEEDmLqa.AVTmSleTv | 259 | USERPAT1 . | . | . |
| A0A2K5QS64_CEBCA 243<br>sEEDmLqa.AVTmSleTv | 259 | USERPAT1 . | . | . |
| A0A2K5QS73_CEBCA 239<br>sEEDmLqa.AVTmSleTv | 255 | USERPAT1 . | . | . |
| A0A2K5QS73_CEBCA 239<br>sEEDmLqa.AVTmSleTv | 255 | USERPAT1 . | . | . |
| A0A2K5QS73_CEBCA 239<br>sEEDmLqa.AVTmSleTv | 255 | USERPAT1 . | . | . |
| A0A2K5QS87_CEBCA 296<br>sEEDmLqa.AVTmSleTv | 312 | USERPAT1 . | . | . |
| A0A2K5QS87_CEBCA 296<br>sEEDmLqa.AVTmSleTv | 312 | USERPAT1 . | . | . |
| A0A2K5QS87_CEBCA 296<br>sEEDmLqa.AVTmSleTv | 312 | USERPAT1 . | . | . |
| A0A2K5QS88_CEBCA 224<br>sEEDmLqa.AVTmSleTv | 240 | USERPAT1 . | . | . |
| A0A2K5QS88_CEBCA 224<br>sEEDmLqa.AVTmSleTv | 240 | USERPAT1 . | . | . |
| A0A2K5QS88_CEBCA 224<br>sEEDmLqa.AVTmSleTv | 240 | USERPAT1 . | . | . |
| A0A2K5S783_CEBCA 123<br>tDEEqAisrVLEaSiaEn | 140 | USERPAT1 . | . | . |
| A0A2K5S783_CEBCA 123<br>tDEEqAisrVLEaSiaEn | 140 | USERPAT1 . | . | . |

|                      |     |            |   |   |
|----------------------|-----|------------|---|---|
| A0A2K5S795_CEBCA 123 | 140 | USERPAT1 . | . | . |
| tDEEqAisrVLEaSiaEn   |     |            |   |   |
| A0A2K5S795_CEBCA 123 | 140 | USERPAT1 . | . | . |
| tDEEqAisrVLEaSiaEn   |     |            |   |   |
| A0A2K5S798_CEBCA 123 | 140 | USERPAT1 . | . | . |
| tDEEqAisrVLEaSiaEn   |     |            |   |   |
| A0A2K5S798_CEBCA 123 | 140 | USERPAT1 . | . | . |
| tDEEqAisrVLEaSiaEn   |     |            |   |   |
| A0A2K5S7A2_CEBCA 123 | 140 | USERPAT1 . | . | . |
| tDEEqAisrVLEaSiaEn   |     |            |   |   |
| A0A2K5S7A2_CEBCA 123 | 140 | USERPAT1 . | . | . |
| tDEEqAisrVLEaSiaEn   |     |            |   |   |
| A0A2K5S7A3_CEBCA 119 | 136 | USERPAT1 . | . | . |
| tDEEqAisrVLEaSiaEn   |     |            |   |   |
| A0A2K5S7A3_CEBCA 119 | 136 | USERPAT1 . | . | . |
| tDEEqAisrVLEaSiaEn   |     |            |   |   |
| A0A2K5SAG7_CEBCA 612 | 628 | USERPAT1 . | . | . |
| sEEElLaa.VLEiSkrEa   |     |            |   |   |
| A0A2K5SAG7_CEBCA 612 | 628 | USERPAT1 . | . | . |
| sEEElLaa.VLEiSkrEa   |     |            |   |   |
| A0A2K5SAG7_CEBCA 612 | 628 | USERPAT1 . | . | . |
| sEEElLaa.VLEiSkrEa   |     |            |   |   |
| A0A2K5SAI6_CEBCA 706 | 722 | USERPAT1 . | . | . |
| sEEElLaa.VLEiSkrEa   |     |            |   |   |
| A0A2K5SAI6_CEBCA 706 | 722 | USERPAT1 . | . | . |
| sEEElLaa.VLEiSkrEa   |     |            |   |   |
| A0A2K5SAI6_CEBCA 706 | 722 | USERPAT1 . | . | . |
| sEEElLaa.VLEiSkrEa   |     |            |   |   |
| A0A2K5VMK7_MACFA 319 | 335 | USERPAT1 . | . | . |
| gEEDmLqa.AVTmSleTv   |     |            |   |   |
| A0A2K5VMK7_MACFA 319 | 335 | USERPAT1 . | . | . |
| gEEDmLqa.AVTmSleTv   |     |            |   |   |
| A0A2K5VMK7_MACFA 319 | 335 | USERPAT1 . | . | . |
| gEEDmLqa.AVTmSleTv   |     |            |   |   |
| A0A2K5VMM1_MACFA 334 | 350 | USERPAT1 . | . | . |
| gEEDmLqa.AVTmSleTv   |     |            |   |   |
| A0A2K5VMM1_MACFA 334 | 350 | USERPAT1 . | . | . |
| gEEDmLqa.AVTmSleTv   |     |            |   |   |
| A0A2K5VMM1_MACFA 334 | 350 | USERPAT1 . | . | . |
| gEEDmLqa.AVTmSleTv   |     |            |   |   |
| A0A2K5VMQ2_MACFA 279 | 295 | USERPAT1 . | . | . |
| gEEDmLqa.AVTmSleTv   |     |            |   |   |
| A0A2K5VMQ2_MACFA 279 | 295 | USERPAT1 . | . | . |
| gEEDmLqa.AVTmSleTv   |     |            |   |   |
| A0A2K5VMQ2_MACFA 279 | 295 | USERPAT1 . | . | . |

gEEDmLqa.AVTmSleTv

|                                            |     |            |   |   |
|--------------------------------------------|-----|------------|---|---|
| A0A2K5VMU2_MACFA 340<br>gEEDmLqa.AVTmSleTv | 356 | USERPAT1 . | . | . |
| A0A2K5VMU2_MACFA 340<br>gEEDmLqa.AVTmSleTv | 356 | USERPAT1 . | . | . |
| A0A2K5VMU2_MACFA 340<br>gEEDmLqa.AVTmSleTv | 356 | USERPAT1 . | . | . |
| A0A2K5VMX8_MACFA 340<br>gEEDmLqa.AVTmSleTv | 356 | USERPAT1 . | . | . |
| A0A2K5VMX8_MACFA 340<br>gEEDmLqa.AVTmSleTv | 356 | USERPAT1 . | . | . |
| A0A2K5VMX8_MACFA 340<br>gEEDmLqa.AVTmSleTv | 356 | USERPAT1 . | . | . |
| A0A2K5WBW8_MACFA 706<br>sEEElLaa.VLEiSkrDa | 722 | USERPAT1 . | . | . |
| A0A2K5WBW8_MACFA 706<br>sEEElLaa.VLEiSkrDa | 722 | USERPAT1 . | . | . |
| A0A2K5WBY8_MACFA 612<br>sEEElLaa.VLEiSkrDa | 628 | USERPAT1 . | . | . |
| A0A2K5WBY8_MACFA 612<br>sEEElLaa.VLEiSkrDa | 628 | USERPAT1 . | . | . |
| A0A2K5X505_MACFA 123<br>tDEEqAisrVLEaSiaEn | 140 | USERPAT1 . | . | . |
| A0A2K5X505_MACFA 123<br>tDEEqAisrVLEaSiaEn | 140 | USERPAT1 . | . | . |
| A0A2K5X566_MACFA 123<br>tDEEqAisrVLEaSiaEn | 140 | USERPAT1 . | . | . |
| A0A2K5X566_MACFA 123<br>tDEEqAisrVLEaSiaEn | 140 | USERPAT1 . | . | . |
| A0A2K5X5E1_MACFA 123<br>tDEEqAisrVLEaSiaEn | 140 | USERPAT1 . | . | . |
| A0A2K5X5E1_MACFA 123<br>tDEEqAisrVLEaSiaEn | 140 | USERPAT1 . | . | . |
| A0A2K5X5F0_MACFA 123<br>tDEEqAisrVLEaSiaEn | 140 | USERPAT1 . | . | . |
| A0A2K5X5F0_MACFA 123<br>tDEEqAisrVLEaSiaEn | 140 | USERPAT1 . | . | . |
| A0A2K5X5I1_MACFA 116<br>tDEEqAisrVLEaSiaEn | 133 | USERPAT1 . | . | . |
| A0A2K5X5I1_MACFA 116<br>tDEEqAisrVLEaSiaEn | 133 | USERPAT1 . | . | . |
| A0A2K5XCF0_MANLE 116<br>tDEEqAisrVLEaSiaEn | 133 | USERPAT1 . | . | . |
| A0A2K5XCF0_MANLE 116                       | 133 | USERPAT1 . | . | . |



tDEEqAisrVLEaSiaEn

|                                            |     |            |   |   |
|--------------------------------------------|-----|------------|---|---|
| A0A2K5XCF2_MANLE 108<br>tDEEqAisrVLEaSiaEn | 125 | USERPAT1 . | . | . |
| A0A2K5XCF2_MANLE 108<br>tDEEqAisrVLEaSiaEn | 125 | USERPAT1 . | . | . |
| A0A2K5XCF4_MANLE 108<br>tDEEqAisrVLEaSiaEn | 125 | USERPAT1 . | . | . |
| A0A2K5XCF4_MANLE 108<br>tDEEqAisrVLEaSiaEn | 125 | USERPAT1 . | . | . |
| A0A2K5XCH2_MANLE 116<br>tDEEqAisrVLEaSiaEn | 133 | USERPAT1 . | . | . |
| A0A2K5XCH2_MANLE 116<br>tDEEqAisrVLEaSiaEn | 133 | USERPAT1 . | . | . |
| A0A2K5ZAF0_MANLE 285<br>gEDDmLqa.AVTmSleTv | 301 | USERPAT1 . | . | . |
| A0A2K5ZAF0_MANLE 285<br>gEDDmLqa.AVTmSleTv | 301 | USERPAT1 . | . | . |
| A0A2K5ZAF0_MANLE 285<br>gEDDmLqa.AVTmSleTv | 301 | USERPAT1 . | . | . |
| A0A2K5ZAM9_MANLE 314<br>gEDDmLqa.AVTmSleTv | 330 | USERPAT1 . | . | . |
| A0A2K5ZAM9_MANLE 314<br>gEDDmLqa.AVTmSleTv | 330 | USERPAT1 . | . | . |
| A0A2K5ZAM9_MANLE 314<br>gEDDmLqa.AVTmSleTv | 330 | USERPAT1 . | . | . |
| A0A2K5ZAN4_MANLE 299<br>gEDDmLqa.AVTmSleTv | 315 | USERPAT1 . | . | . |
| A0A2K5ZAN4_MANLE 299<br>gEDDmLqa.AVTmSleTv | 315 | USERPAT1 . | . | . |
| A0A2K5ZAN4_MANLE 299<br>gEDDmLqa.AVTmSleTv | 315 | USERPAT1 . | . | . |
| A0A2K5ZAN9_MANLE 270<br>gEDDmLqa.AVTmSleTv | 286 | USERPAT1 . | . | . |
| A0A2K5ZAN9_MANLE 270<br>gEDDmLqa.AVTmSleTv | 286 | USERPAT1 . | . | . |
| A0A2K5ZAN9_MANLE 270<br>gEDDmLqa.AVTmSleTv | 286 | USERPAT1 . | . | . |
| A0A2K5ZAP4_MANLE 263<br>gEDDmLqa.AVTmSleTv | 279 | USERPAT1 . | . | . |
| A0A2K5ZAP4_MANLE 263<br>gEDDmLqa.AVTmSleTv | 279 | USERPAT1 . | . | . |
| A0A2K5ZAP4_MANLE 263<br>gEDDmLqa.AVTmSleTv | 279 | USERPAT1 . | . | . |
| A0A2K5ZAP6_MANLE 161<br>gEDDmLqa.AVTmSleTv | 177 | USERPAT1 . | . | . |

|                                            |     |            |   |   |
|--------------------------------------------|-----|------------|---|---|
| A0A2K5ZAP6_MANLE 161<br>gEDDmLqa.AVTmSleTv | 177 | USERPAT1 . | . | . |
| A0A2K5ZAP6_MANLE 161<br>gEDDmLqa.AVTmSleTv | 177 | USERPAT1 . | . | . |
| A0A2K5ZAS2_MANLE 255<br>gEDDmLqa.AVTmSleTv | 271 | USERPAT1 . | . | . |
| A0A2K5ZAS2_MANLE 255<br>gEDDmLqa.AVTmSleTv | 271 | USERPAT1 . | . | . |
| A0A2K5ZAS2_MANLE 255<br>gEDDmLqa.AVTmSleTv | 271 | USERPAT1 . | . | . |
| A0A2K5ZAS5_MANLE 304<br>gEDDmLqa.AVTmSleTv | 320 | USERPAT1 . | . | . |
| A0A2K5ZAS5_MANLE 304<br>gEDDmLqa.AVTmSleTv | 320 | USERPAT1 . | . | . |
| A0A2K5ZAS5_MANLE 304<br>gEDDmLqa.AVTmSleTv | 320 | USERPAT1 . | . | . |
| A0A2K5ZHD8_MANLE 706<br>sEEElLaa.VLEiSkrDa | 722 | USERPAT1 . | . | . |
| A0A2K5ZHD8_MANLE 706<br>sEEElLaa.VLEiSkrDa | 722 | USERPAT1 . | . | . |
| A0A2K5ZHK6_MANLE 612<br>sEEElLaa.VLEiSkrDa | 628 | USERPAT1 . | . | . |
| A0A2K5ZHK6_MANLE 612<br>sEEElLaa.VLEiSkrDa | 628 | USERPAT1 . | . | . |
| A0A2K6C5A8_MACNE 314<br>gEEDmLqa.AVTmSleTv | 330 | USERPAT1 . | . | . |
| A0A2K6C5A8_MACNE 314<br>gEEDmLqa.AVTmSleTv | 330 | USERPAT1 . | . | . |
| A0A2K6C5A8_MACNE 314<br>gEEDmLqa.AVTmSleTv | 330 | USERPAT1 . | . | . |
| A0A2K6C5B8_MACNE 305<br>gEEDmLqa.AVTmSleTv | 321 | USERPAT1 . | . | . |
| A0A2K6C5B8_MACNE 305<br>gEEDmLqa.AVTmSleTv | 321 | USERPAT1 . | . | . |
| A0A2K6C5B8_MACNE 305<br>gEEDmLqa.AVTmSleTv | 321 | USERPAT1 . | . | . |
| A0A2K6C5F6_MACNE 297<br>gEEDmLqa.AVTmSleTv | 313 | USERPAT1 . | . | . |
| A0A2K6C5F6_MACNE 297<br>gEEDmLqa.AVTmSleTv | 313 | USERPAT1 . | . | . |
| A0A2K6C5F6_MACNE 297<br>gEEDmLqa.AVTmSleTv | 313 | USERPAT1 . | . | . |
| A0A2K6C5F9_MACNE 288<br>gEEDmLqa.AVTmSleTv | 304 | USERPAT1 . | . | . |
| A0A2K6C5F9_MACNE 288<br>gEEDmLqa.AVTmSleTv | 304 | USERPAT1 . | . | . |

|                                             |     |            |   |   |
|---------------------------------------------|-----|------------|---|---|
| A0A2K6C5F9_MACNE 288<br>gEEDmLqa.AVTmSleTv  | 304 | USERPAT1 . | . | . |
| A0A2K6CR70_MACNE 322<br>gEEDmLqa.AVTmSleTv  | 338 | USERPAT1 . | . | . |
| A0A2K6CR70_MACNE 322<br>gEEDmLqa.AVTmSleTv  | 338 | USERPAT1 . | . | . |
| A0A2K6CR70_MACNE 322<br>gEEDmLqa.AVTmSleTv  | 338 | USERPAT1 . | . | . |
| A0A2K6CR89_MACNE 337<br>gEEDmLqa.AVTmSleTv  | 353 | USERPAT1 . | . | . |
| A0A2K6CR89_MACNE 337<br>gEEDmLqa.AVTmSleTv  | 353 | USERPAT1 . | . | . |
| A0A2K6CR89_MACNE 337<br>gEEDmLqa.AVTmSleTv  | 353 | USERPAT1 . | . | . |
| A0A2K6CRA0_MACNE 286<br>gEEDmLqa.AVTmSleTv  | 302 | USERPAT1 . | . | . |
| A0A2K6CRA0_MACNE 286<br>gEEDmLqa.AVTmSleTv  | 302 | USERPAT1 . | . | . |
| A0A2K6CRA0_MACNE 286<br>gEEDmLqa.AVTmSleTv  | 302 | USERPAT1 . | . | . |
| A0A2K6CRB9_MACNE 267<br>gEEDmLqa.AVTmSleTv  | 283 | USERPAT1 . | . | . |
| A0A2K6CRB9_MACNE 267<br>gEEDmLqa.AVTmSleTv  | 283 | USERPAT1 . | . | . |
| A0A2K6CRB9_MACNE 267<br>gEEDmLqa.AVTmSleTv  | 283 | USERPAT1 . | . | . |
| A0A2K6CRD4_MACNE 282<br>gEEDmLqa.AVTmSleTv  | 298 | USERPAT1 . | . | . |
| A0A2K6CRD4_MACNE 282<br>gEEDmLqa.AVTmSleTv  | 298 | USERPAT1 . | . | . |
| A0A2K6CRD4_MACNE 282<br>gEEDmLqa.AVTmSleTv  | 298 | USERPAT1 . | . | . |
| A0A2K6D0E5_MACNE 706<br>sEEEllLaa.VLGvSkrDa | 722 | USERPAT1 . | . | . |
| A0A2K6D0E5_MACNE 706<br>sEEEllLaa.VLGvSkrDa | 722 | USERPAT1 . | . | . |
| A0A2K6D0H3_MACNE 612<br>sEEEllLaa.VLGvSkrDa | 628 | USERPAT1 . | . | . |
| A0A2K6D0H3_MACNE 612<br>sEEEllLaa.VLGvSkrDa | 628 | USERPAT1 . | . | . |
| A0A2K6E0V0_MACNE 123<br>tDEEqAisrVLEaSiaEn  | 140 | USERPAT1 . | . | . |
| A0A2K6E0V0_MACNE 123<br>tDEEqAisrVLEaSiaEn  | 140 | USERPAT1 . | . | . |
| A0A2K6E0W2_MACNE 123                        | 140 | USERPAT1 . | . | . |

|                                                                                          |     |            |   |   |
|------------------------------------------------------------------------------------------|-----|------------|---|---|
| tDEEqAisrVLEaSiaEn<br>A0A2K6E0W2_MACNE 123<br>tDEEqAisrVLEaSiaEn                         | 140 | USERPAT1 . | . | . |
| A0A2K6E0Y0_MACNE 123<br>tDEEqAisrVLEaSiaEn<br>A0A2K6E0Y0_MACNE 123<br>tDEEqAisrVLEaSiaEn | 140 | USERPAT1 . | . | . |
| A0A2K6E0Y7_MACNE 116<br>tDEEqAisrVLEaSiaEn<br>A0A2K6E0Y7_MACNE 116<br>tDEEqAisrVLEaSiaEn | 133 | USERPAT1 . | . | . |
| A0A2K6E0Z1_MACNE 123<br>tDEEqAisrVLEaSiaEn<br>A0A2K6E0Z1_MACNE 123<br>tDEEqAisrVLEaSiaEn | 140 | USERPAT1 . | . | . |
| A0A2K6FS24_PROCO 573<br>sEEElLaa.VLEiSktEt<br>A0A2K6FS24_PROCO 573<br>sEEElLaa.VLEiSktEt | 589 | USERPAT1 . | . | . |
| A0A2K6FS28_PROCO 647<br>sEEElLaa.VLEiSktEt<br>A0A2K6FS28_PROCO 647<br>sEEElLaa.VLEiSktEt | 663 | USERPAT1 . | . | . |
| A0A2K6FYR8_PROCO 123<br>tDEEqAisrVLEaSiaEn<br>A0A2K6FYR8_PROCO 123<br>tDEEqAisrVLEaSiaEn | 140 | USERPAT1 . | . | . |
| A0A2K6FYS1_PROCO 123<br>tDEEqAisrVLEaSiaEn<br>A0A2K6FYS1_PROCO 123<br>tDEEqAisrVLEaSiaEn | 140 | USERPAT1 . | . | . |
| A0A2K6FYT1_PROCO 123<br>tDEEqAisrVLEaSiaEn<br>A0A2K6FYT1_PROCO 123<br>tDEEqAisrVLEaSiaEn | 140 | USERPAT1 . | . | . |
| A0A2K6KTJ1_RHIBE 706<br>sEEElLaa.VLEiSkrDa<br>A0A2K6KTJ1_RHIBE 706<br>sEEElLaa.VLEiSkrDa | 722 | USERPAT1 . | . | . |
| A0A2K6KTJ5_RHIBE 612<br>sEEElLaa.VLEiSkrDa<br>A0A2K6KTJ5_RHIBE 612<br>sEEElLaa.VLEiSkrDa | 628 | USERPAT1 . | . | . |

|                      |     |            |   |   |
|----------------------|-----|------------|---|---|
| A0A2K6LPK2_RHIBE 123 | 140 | USERPAT1 . | . | . |
| tDEEqAisrVLEaSiaEn   |     |            |   |   |
| A0A2K6LPK2_RHIBE 123 | 140 | USERPAT1 . | . | . |
| tDEEqAisrVLEaSiaEn   |     |            |   |   |
| A0A2K6LPK3_RHIBE 123 | 140 | USERPAT1 . | . | . |
| tDEEqAisrVLEaSiaEn   |     |            |   |   |
| A0A2K6LPK3_RHIBE 123 | 140 | USERPAT1 . | . | . |
| tDEEqAisrVLEaSiaEn   |     |            |   |   |
| A0A2K6LPK5_RHIBE 116 | 133 | USERPAT1 . | . | . |
| tDEEqAisrVLEaSiaEn   |     |            |   |   |
| A0A2K6LPK5_RHIBE 116 | 133 | USERPAT1 . | . | . |
| tDEEqAisrVLEaSiaEn   |     |            |   |   |
| A0A2K6LPP5_RHIBE 123 | 140 | USERPAT1 . | . | . |
| tDEEqAisrVLEaSiaEn   |     |            |   |   |
| A0A2K6LPP5_RHIBE 123 | 140 | USERPAT1 . | . | . |
| tDEEqAisrVLEaSiaEn   |     |            |   |   |
| A0A2K6LPQ2_RHIBE 123 | 140 | USERPAT1 . | . | . |
| tDEEqAisrVLEaSiaEn   |     |            |   |   |
| A0A2K6LPQ2_RHIBE 123 | 140 | USERPAT1 . | . | . |
| tDEEqAisrVLEaSiaEn   |     |            |   |   |
| A0A2K6Q5D4_RHIRO 123 | 140 | USERPAT1 . | . | . |
| tDEEqAisrVLEaSiaEn   |     |            |   |   |
| A0A2K6Q5D4_RHIRO 123 | 140 | USERPAT1 . | . | . |
| tDEEqAisrVLEaSiaEn   |     |            |   |   |
| A0A2K6Q5D7_RHIRO 123 | 140 | USERPAT1 . | . | . |
| tDEEqAisrVLEaSiaEn   |     |            |   |   |
| A0A2K6Q5D7_RHIRO 123 | 140 | USERPAT1 . | . | . |
| tDEEqAisrVLEaSiaEn   |     |            |   |   |
| A0A2K6Q5E6_RHIRO 123 | 140 | USERPAT1 . | . | . |
| tDEEqAisrVLEaSiaEn   |     |            |   |   |
| A0A2K6Q5E6_RHIRO 123 | 140 | USERPAT1 . | . | . |
| tDEEqAisrVLEaSiaEn   |     |            |   |   |
| A0A2K6Q5E8_RHIRO 116 | 133 | USERPAT1 . | . | . |
| tDEEqAisrVLEaSiaEn   |     |            |   |   |
| A0A2K6Q5E8_RHIRO 116 | 133 | USERPAT1 . | . | . |
| tDEEqAisrVLEaSiaEn   |     |            |   |   |
| A0A2K6Q5F6_RHIRO 123 | 140 | USERPAT1 . | . | . |
| tDEEqAisrVLEaSiaEn   |     |            |   |   |
| A0A2K6Q5F6_RHIRO 123 | 140 | USERPAT1 . | . | . |
| tDEEqAisrVLEaSiaEn   |     |            |   |   |
| A0A2K6QIU0_RHIRO 257 | 273 | USERPAT1 . | . | . |
| gEEDmLqa.AVTmSleTv   |     |            |   |   |
| A0A2K6QIU0_RHIRO 257 | 273 | USERPAT1 . | . | . |
| gEEDmLqa.AVTmSleTv   |     |            |   |   |

|                                             |     |            |   |   |
|---------------------------------------------|-----|------------|---|---|
| A0A2K6QIU0_RHIRO 257<br>gEEDmLqa.AVTmSleTv  | 273 | USERPAT1 . | . | . |
| A0A2K6QIX4_RHIRO 278<br>gEEDmLqa.AVTmSleTv  | 294 | USERPAT1 . | . | . |
| A0A2K6QIX4_RHIRO 278<br>gEEDmLqa.AVTmSleTv  | 294 | USERPAT1 . | . | . |
| A0A2K6QIX4_RHIRO 278<br>gEEDmLqa.AVTmSleTv  | 294 | USERPAT1 . | . | . |
| A0A2K6QIY3_RHIRO 312<br>gEEDmLqa.AVTmSleTv  | 328 | USERPAT1 . | . | . |
| A0A2K6QIY3_RHIRO 312<br>gEEDmLqa.AVTmSleTv  | 328 | USERPAT1 . | . | . |
| A0A2K6QIY3_RHIRO 312<br>gEEDmLqa.AVTmSleTv  | 328 | USERPAT1 . | . | . |
| A0A2K6QIY4_RHIRO 339<br>gEEDmLqa.AVTmSleTv  | 355 | USERPAT1 . | . | . |
| A0A2K6QIY4_RHIRO 339<br>gEEDmLqa.AVTmSleTv  | 355 | USERPAT1 . | . | . |
| A0A2K6QIY4_RHIRO 339<br>gEEDmLqa.AVTmSleTv  | 355 | USERPAT1 . | . | . |
| A0A2K6QIZ0_RHIRO 259<br>gEEDmLqa.AVTmSleTv  | 275 | USERPAT1 . | . | . |
| A0A2K6QIZ0_RHIRO 259<br>gEEDmLqa.AVTmSleTv  | 275 | USERPAT1 . | . | . |
| A0A2K6QIZ0_RHIRO 259<br>gEEDmLqa.AVTmSleTv  | 275 | USERPAT1 . | . | . |
| A0A2K6RIY8_RHIRO 684<br>sEEElLaa.VLEiSkrDa  | 700 | USERPAT1 . | . | . |
| A0A2K6RIY8_RHIRO 684<br>sEEElLaa.VLEiSkrDa  | 700 | USERPAT1 . | . | . |
| A0A2K6RIZ5_RHIRO 706<br>sEEElLaa.VLEiSkrDa  | 722 | USERPAT1 . | . | . |
| A0A2K6RIZ5_RHIRO 706<br>sEEElLaa.VLEiSkrDa  | 722 | USERPAT1 . | . | . |
| A0A2K6RJ05_RHIRO 706<br>sEEElLaa.VLEiSkrDa  | 722 | USERPAT1 . | . | . |
| A0A2K6RJ05_RHIRO 706<br>sEEElLaa.VLEiSkrDa  | 722 | USERPAT1 . | . | . |
| A0A2K6S3S7_SAIIBB 119<br>tDEEqAisrVLEaSiaEn | 136 | USERPAT1 . | . | . |
| A0A2K6S3S7_SAIIBB 119<br>tDEEqAisrVLEaSiaEn | 136 | USERPAT1 . | . | . |
| A0A2K6S3T3_SAIIBB 119<br>tDEEqAisrVLEaSiaEn | 136 | USERPAT1 . | . | . |
| A0A2K6S3T3_SAIIBB 119<br>tDEEqAisrVLEaSiaEn | 136 | USERPAT1 . | . | . |

tDEEqAisrVLEaSiaEn

A0A2K6S3W5\_SAIBB 108 125 USERPAT1 . . .

tDEEqAisrVLEaSiaEn

A0A2K6S3W5\_SAIBB 108 125 USERPAT1 . . .

tDEEqAisrVLEaSiaEn

A0A2K6S3X0\_SAIBB 108 125 USERPAT1 . . .

tDEEqAisrVLEaSiaEn

A0A2K6S3X0\_SAIBB 108 125 USERPAT1 . . .

tDEEqAisrVLEaSiaEn

A0A2K6SAB9\_SAIBB 284 300 USERPAT1 . . .

sEEDmLqa.AVTmSleTv

A0A2K6SAB9\_SAIBB 284 300 USERPAT1 . . .

sEEDmLqa.AVTmSleTv

A0A2K6SAB9\_SAIBB 284 300 USERPAT1 . . .

sEEDmLqa.AVTmSleTv

A0A2K6SAC7\_SAIBB 229 245 USERPAT1 . . .

sEEDmLqa.AVTmSleTv

A0A2K6SAC7\_SAIBB 229 245 USERPAT1 . . .

sEEDmLqa.AVTmSleTv

A0A2K6SAC7\_SAIBB 229 245 USERPAT1 . . .

sEEDmLqa.AVTmSleTv

A0A2K6SAD3\_SAIBB 269 285 USERPAT1 . . .

sEEDmLqa.AVTmSleTv

A0A2K6SAD3\_SAIBB 269 285 USERPAT1 . . .

sEEDmLqa.AVTmSleTv

A0A2K6SAD3\_SAIBB 269 285 USERPAT1 . . .

sEEDmLqa.AVTmSleTv

A0A2K6SAE7\_SAIBB 214 230 USERPAT1 . . .

sEEDmLqa.AVTmSleTv

A0A2K6SAE7\_SAIBB 214 230 USERPAT1 . . .

sEEDmLqa.AVTmSleTv

A0A2K6SAE7\_SAIBB 214 230 USERPAT1 . . .

sEEDmLqa.AVTmSleTv

A0A2K6SAG3\_SAIBB 297 313 USERPAT1 . . .

sEEDmLqa.AVTmSleTv

A0A2K6SAG3\_SAIBB 297 313 USERPAT1 . . .

sEEDmLqa.AVTmSleTv

A0A2K6SAG3\_SAIBB 297 313 USERPAT1 . . .

sEEDmLqa.AVTmSleTv

A0A2P6TCJ9\_CHLS0 52 68 USERPAT1 . . .

tEEELqr.ALEmSmaEa

A0A2R2MSQ0\_LINUN 623 639 USERPAT1 . . .

sEEDqLqa.ALEmSlqEa

A0A2R2MSQ0\_LINUN 623 639 USERPAT1 . . .

sEEDqLqa.ALEmSlqEa

|                                            |     |            |   |   |
|--------------------------------------------|-----|------------|---|---|
| A0A2R2MSQ0_LINUN 623<br>sEEDqLqa.ALEmSlqEa | 639 | USERPAT1 . | . | . |
| A0A2R2MSS4_LINUN 624<br>sEEDqLqa.ALEmSlqEa | 640 | USERPAT1 . | . | . |
| A0A2R2MSS4_LINUN 624<br>sEEDqLqa.ALEmSlqEa | 640 | USERPAT1 . | . | . |
| A0A2R2MSS4_LINUN 624<br>sEEDqLqa.ALEmSlqEa | 640 | USERPAT1 . | . | . |
| A0A2R8MPD6_CALJA 325<br>sEEDmLqa.AVTmSleTv | 341 | USERPAT1 . | . | . |
| A0A2R8MPD6_CALJA 325<br>sEEDmLqa.AVTmSleTv | 341 | USERPAT1 . | . | . |
| A0A2R8MPD6_CALJA 325<br>sEEDmLqa.AVTmSleTv | 341 | USERPAT1 . | . | . |
| A0A2R8N2N5_CALJA 119<br>tDEEqAisrVLEaSiaEn | 136 | USERPAT1 . | . | . |
| A0A2R8N2N5_CALJA 119<br>tDEEqAisrVLEaSiaEn | 136 | USERPAT1 . | . | . |
| A0A2R8P551_CALJA 289<br>sEEDmLqa.AVTmSleTv | 305 | USERPAT1 . | . | . |
| A0A2R8P551_CALJA 289<br>sEEDmLqa.AVTmSleTv | 305 | USERPAT1 . | . | . |
| A0A2R8P551_CALJA 289<br>sEEDmLqa.AVTmSleTv | 305 | USERPAT1 . | . | . |
| A0A2R8PDN5_CALJA 270<br>sEEDmLqa.AVTmSleTv | 286 | USERPAT1 . | . | . |
| A0A2R8PDN5_CALJA 270<br>sEEDmLqa.AVTmSleTv | 286 | USERPAT1 . | . | . |
| A0A2R8PDN5_CALJA 270<br>sEEDmLqa.AVTmSleTv | 286 | USERPAT1 . | . | . |
| A0A2R8Z9I3_PANPA 283<br>sEEDmLqa.AVTmSleTv | 299 | USERPAT1 . | . | . |
| A0A2R8Z9I3_PANPA 283<br>sEEDmLqa.AVTmSleTv | 299 | USERPAT1 . | . | . |
| A0A2R8Z9I3_PANPA 283<br>sEEDmLqa.AVTmSleTv | 299 | USERPAT1 . | . | . |
| A0A2R8Z9J0_PANPA 232<br>sEEDmLqa.AVTmSleTv | 248 | USERPAT1 . | . | . |
| A0A2R8Z9J0_PANPA 232<br>sEEDmLqa.AVTmSleTv | 248 | USERPAT1 . | . | . |
| A0A2R8Z9J0_PANPA 232<br>sEEDmLqa.AVTmSleTv | 248 | USERPAT1 . | . | . |
| A0A2R8ZCW5_PANPA 224<br>qDEEdFqr.ALElSrqEt | 240 | USERPAT1 . | . | . |
| A0A2R8ZCW5_PANPA 224<br>qDEEdFqr.ALElSrqEt | 240 | USERPAT1 . | . | . |



|                      |     |            |   |   |
|----------------------|-----|------------|---|---|
| A0A2R8ZDP2_PANPA 281 | 297 | USERPAT1 . | . | . |
| sEEDmLqa.AVTmSleTv   |     |            |   |   |
| A0A2R8ZDP2_PANPA 281 | 297 | USERPAT1 . | . | . |
| sEEDmLqa.AVTmSleTv   |     |            |   |   |
| A0A2R8ZDP2_PANPA 281 | 297 | USERPAT1 . | . | . |
| sEEDmLqa.AVTmSleTv   |     |            |   |   |
| A0A2R8ZGA2_PANPA 268 | 284 | USERPAT1 . | . | . |
| sEEDmLqa.AVTmSleTv   |     |            |   |   |
| A0A2R8ZGA2_PANPA 268 | 284 | USERPAT1 . | . | . |
| sEEDmLqa.AVTmSleTv   |     |            |   |   |
| A0A2R8ZGA2_PANPA 268 | 284 | USERPAT1 . | . | . |
| sEEDmLqa.AVTmSleTv   |     |            |   |   |
| A0A2R9A530_PANPA 704 | 720 | USERPAT1 . | . | . |
| sEEElLaa.VLEiSkrDa   |     |            |   |   |
| A0A2R9A530_PANPA 704 | 720 | USERPAT1 . | . | . |
| sEEElLaa.VLEiSkrDa   |     |            |   |   |
| A0A2R9A6A4_PANPA 704 | 720 | USERPAT1 . | . | . |
| sEEElLaa.VLEiSkrDa   |     |            |   |   |
| A0A2R9A6A4_PANPA 704 | 720 | USERPAT1 . | . | . |
| sEEElLaa.VLEiSkrDa   |     |            |   |   |
| A0A2R9A9T7_PANPA 610 | 626 | USERPAT1 . | . | . |
| sEEElLaa.VLEiSkrDa   |     |            |   |   |
| A0A2R9A9T7_PANPA 610 | 626 | USERPAT1 . | . | . |
| sEEElLaa.VLEiSkrDa   |     |            |   |   |
| A0A2R9BV93_PANPA 163 | 180 | USERPAT1 . | . | . |
| tDEEqAisrVLEaSiaEn   |     |            |   |   |
| A0A2R9BV93_PANPA 163 | 180 | USERPAT1 . | . | . |
| tDEEqAisrVLEaSiaEn   |     |            |   |   |
| A0A2R9BVF7_PANPA 108 | 125 | USERPAT1 . | . | . |
| tDEEqAisrVLEaSiaEn   |     |            |   |   |
| A0A2R9BVF7_PANPA 108 | 125 | USERPAT1 . | . | . |
| tDEEqAisrVLEaSiaEn   |     |            |   |   |
| A0A2R9BVY5_PANPA 172 | 189 | USERPAT1 . | . | . |
| tDEEqAisrVLEaSiaEn   |     |            |   |   |
| A0A2R9BVY5_PANPA 172 | 189 | USERPAT1 . | . | . |
| tDEEqAisrVLEaSiaEn   |     |            |   |   |
| A0A2R9BYP4_PANPA 163 | 180 | USERPAT1 . | . | . |
| tDEEqAisrVLEaSiaEn   |     |            |   |   |
| A0A2R9BYP4_PANPA 163 | 180 | USERPAT1 . | . | . |
| tDEEqAisrVLEaSiaEn   |     |            |   |   |
| A0A2R9BYT7_PANPA 116 | 133 | USERPAT1 . | . | . |
| tDEEqAisrVLEaSiaEn   |     |            |   |   |
| A0A2R9BYT7_PANPA 116 | 133 | USERPAT1 . | . | . |
| tDEEqAisrVLEaSiaEn   |     |            |   |   |

|                      |     |            |   |   |
|----------------------|-----|------------|---|---|
| A0A2R9BYV0_PANPA 108 | 125 | USERPAT1 . | . | . |
| tDEEqAisrVLEaSiaEn   |     |            |   |   |
| A0A2R9BYV0_PANPA 108 | 125 | USERPAT1 . | . | . |
| tDEEqAisrVLEaSiaEn   |     |            |   |   |
| A0A2R9C547_PANPA 116 | 133 | USERPAT1 . | . | . |
| tDEEqAisrVLEaSiaEn   |     |            |   |   |
| A0A2R9C547_PANPA 116 | 133 | USERPAT1 . | . | . |
| tDEEqAisrVLEaSiaEn   |     |            |   |   |
| A0A2U3VI69_ODORO 319 | 335 | USERPAT1 . | . | . |
| sEEDmLqa.AVTmSleTv   |     |            |   |   |
| A0A2U3VI69_ODORO 319 | 335 | USERPAT1 . | . | . |
| sEEDmLqa.AVTmSleTv   |     |            |   |   |
| A0A2U3VI69_ODORO 319 | 335 | USERPAT1 . | . | . |
| sEEDmLqa.AVTmSleTv   |     |            |   |   |
| A0A2U3VI71_ODORO 283 | 299 | USERPAT1 . | . | . |
| sEEDmLqa.AVTmSleTv   |     |            |   |   |
| A0A2U3VI71_ODORO 283 | 299 | USERPAT1 . | . | . |
| sEEDmLqa.AVTmSleTv   |     |            |   |   |
| A0A2U3VI71_ODORO 283 | 299 | USERPAT1 . | . | . |
| sEEDmLqa.AVTmSleTv   |     |            |   |   |
| A0A2U3VI74_ODORO 334 | 350 | USERPAT1 . | . | . |
| sEEDmLqa.AVTmSleTv   |     |            |   |   |
| A0A2U3VI74_ODORO 334 | 350 | USERPAT1 . | . | . |
| sEEDmLqa.AVTmSleTv   |     |            |   |   |
| A0A2U3VI74_ODORO 334 | 350 | USERPAT1 . | . | . |
| sEEDmLqa.AVTmSleTv   |     |            |   |   |
| A0A2U3W3W0_ODORO 704 | 720 | USERPAT1 . | . | . |
| sEEElLaa.VLEmSkrEa   |     |            |   |   |
| A0A2U3W3W0_ODORO 704 | 720 | USERPAT1 . | . | . |
| sEEElLaa.VLEmSkrEa   |     |            |   |   |
| A0A2U3W3W0_ODORO 704 | 720 | USERPAT1 . | . | . |
| sEEElLaa.VLEmSkrEa   |     |            |   |   |
| A0A2U3Wnk6_ODORO 123 | 140 | USERPAT1 . | . | . |
| tDEEqAisrVLEaSiaEn   |     |            |   |   |
| A0A2U3Wnk6_ODORO 123 | 140 | USERPAT1 . | . | . |
| tDEEqAisrVLEaSiaEn   |     |            |   |   |
| A0A2U3WNL0_ODORO 123 | 140 | USERPAT1 . | . | . |
| tDEEqAisrVLEaSiaEn   |     |            |   |   |
| A0A2U3WNL0_ODORO 123 | 140 | USERPAT1 . | . | . |
| tDEEqAisrVLEaSiaEn   |     |            |   |   |
| A0A2U3WNL2_ODORO 123 | 140 | USERPAT1 . | . | . |
| tDEEqAisrVLEaSiaEn   |     |            |   |   |
| A0A2U3WNL2_ODORO 123 | 140 | USERPAT1 . | . | . |
| tDEEqAisrVLEaSiaEn   |     |            |   |   |

|                      |     |            |   |   |
|----------------------|-----|------------|---|---|
| A0A2U3YG82_LEPWE 123 | 140 | USERPAT1 . | . | . |
| tDEEqAisrVLEaSiaEn   |     |            |   |   |
| A0A2U3YG82_LEPWE 123 | 140 | USERPAT1 . | . | . |
| tDEEqAisrVLEaSiaEn   |     |            |   |   |
| A0A2U3YG86_LEPWE 123 | 140 | USERPAT1 . | . | . |
| tDEEqAisrVLEaSiaEn   |     |            |   |   |
| A0A2U3YG86_LEPWE 123 | 140 | USERPAT1 . | . | . |
| tDEEqAisrVLEaSiaEn   |     |            |   |   |
| A0A2U3YG90_LEPWE 123 | 140 | USERPAT1 . | . | . |
| tDEEqAisrVLEaSiaEn   |     |            |   |   |
| A0A2U3YG90_LEPWE 123 | 140 | USERPAT1 . | . | . |
| tDEEqAisrVLEaSiaEn   |     |            |   |   |
| A0A2U3YYM3_LEPWE 619 | 635 | USERPAT1 . | . | . |
| sEEElLaa.VLEmSkrEa   |     |            |   |   |
| A0A2U3YYM3_LEPWE 619 | 635 | USERPAT1 . | . | . |
| sEEElLaa.VLEmSkrEa   |     |            |   |   |
| A0A2U3YYM3_LEPWE 619 | 635 | USERPAT1 . | . | . |
| sEEElLaa.VLEmSkrEa   |     |            |   |   |
| A0A2U3Z9T4_ODOR0 327 | 343 | USERPAT1 . | . | . |
| sEEDmLqa.AVTmSleTv   |     |            |   |   |
| A0A2U3Z9T4_ODOR0 327 | 343 | USERPAT1 . | . | . |
| sEEDmLqa.AVTmSleTv   |     |            |   |   |
| A0A2U3Z9T4_ODOR0 327 | 343 | USERPAT1 . | . | . |
| sEEDmLqa.AVTmSleTv   |     |            |   |   |
| A0A2U3ZAS3_ODOR0 325 | 341 | USERPAT1 . | . | . |
| sEEDmLqa.AVTmSleTv   |     |            |   |   |
| A0A2U3ZAS3_ODOR0 325 | 341 | USERPAT1 . | . | . |
| sEEDmLqa.AVTmSleTv   |     |            |   |   |
| A0A2U3ZAS3_ODOR0 325 | 341 | USERPAT1 . | . | . |
| sEEDmLqa.AVTmSleTv   |     |            |   |   |
| A0A2U4A049_TURTR 324 | 340 | USERPAT1 . | . | . |
| sEEDmLqa.AVTmSleTv   |     |            |   |   |
| A0A2U4A049_TURTR 324 | 340 | USERPAT1 . | . | . |
| sEEDmLqa.AVTmSleTv   |     |            |   |   |
| A0A2U4A049_TURTR 324 | 340 | USERPAT1 . | . | . |
| sEEDmLqa.AVTmSleTv   |     |            |   |   |
| A0A2U4A057_TURTR 334 | 350 | USERPAT1 . | . | . |
| sEEDmLqa.AVTmSleTv   |     |            |   |   |
| A0A2U4A057_TURTR 334 | 350 | USERPAT1 . | . | . |
| sEEDmLqa.AVTmSleTv   |     |            |   |   |
| A0A2U4A057_TURTR 334 | 350 | USERPAT1 . | . | . |
| sEEDmLqa.AVTmSleTv   |     |            |   |   |
| A0A2U4A0F2_TURTR 273 | 289 | USERPAT1 . | . | . |
| sEEDmLqa.AVTmSleTv   |     |            |   |   |
| A0A2U4A0F2_TURTR 273 | 289 | USERPAT1 . | . | . |
| sEEDmLqa.AVTmSleTv   |     |            |   |   |

|                                            |     |            |   |   |
|--------------------------------------------|-----|------------|---|---|
| A0A2U4A0F2_TURTR 273<br>sEEDmLqa.AVTmSleTv | 289 | USERPAT1 . | . | . |
| A0A2U4AAQ4_TURTR 123<br>tDEEqAisrVLEaSiaEn | 140 | USERPAT1 . | . | . |
| A0A2U4AAQ4_TURTR 123<br>tDEEqAisrVLEaSiaEn | 140 | USERPAT1 . | . | . |
| A0A2U4AAU2_TURTR 123<br>tDEEqAisrVLEaSiaEn | 140 | USERPAT1 . | . | . |
| A0A2U4AAU2_TURTR 123<br>tDEEqAisrVLEaSiaEn | 140 | USERPAT1 . | . | . |
| A0A2U4AB23_TURTR 123<br>tDEEqAisrVLEaSiaEn | 140 | USERPAT1 . | . | . |
| A0A2U4AB23_TURTR 123<br>tDEEqAisrVLEaSiaEn | 140 | USERPAT1 . | . | . |
| A0A2U4BMR5_TURTR 706<br>sEEElLaa.VLEiSkrEa | 722 | USERPAT1 . | . | . |
| A0A2U4BMR5_TURTR 706<br>sEEElLaa.VLEiSkrEa | 722 | USERPAT1 . | . | . |
| A0A2U4BMR5_TURTR 706<br>sEEElLaa.VLEiSkrEa | 722 | USERPAT1 . | . | . |
| A0A2U9C875_SCOMX 686<br>nDDEmLaa.VLEmSrqEa | 702 | USERPAT1 . | . | . |
| A0A2U9C875_SCOMX 686<br>nDDEmLaa.VLEmSrqEa | 702 | USERPAT1 . | . | . |
| A0A2U9C875_SCOMX 686<br>nDDEmLaa.VLEmSrqEa | 702 | USERPAT1 . | . | . |
| A0A2Y9DB53_TRIMA 124<br>tDEEqAisrVLEaSiaEn | 141 | USERPAT1 . | . | . |
| A0A2Y9DB53_TRIMA 124<br>tDEEqAisrVLEaSiaEn | 141 | USERPAT1 . | . | . |
| A0A2Y9DKN0_TRIMA 706<br>sEEElVaa.VLEiSkrEt | 722 | USERPAT1 . | . | . |
| A0A2Y9DKN0_TRIMA 706<br>sEEElVaa.VLEiSkrEt | 722 | USERPAT1 . | . | . |
| A0A2Y9ELX6_PHYMC 323<br>sEEDmLqa.AVTmSleTv | 339 | USERPAT1 . | . | . |
| A0A2Y9ELX6_PHYMC 323<br>sEEDmLqa.AVTmSleTv | 339 | USERPAT1 . | . | . |
| A0A2Y9ELX6_PHYMC 323<br>sEEDmLqa.AVTmSleTv | 339 | USERPAT1 . | . | . |
| A0A2Y9EM29_PHYMC 324<br>sEEDmLqa.AVTmSleTv | 340 | USERPAT1 . | . | . |
| A0A2Y9EM29_PHYMC 324<br>sEEDmLqa.AVTmSleTv | 340 | USERPAT1 . | . | . |
| A0A2Y9EM29_PHYMC 324<br>sEEDmLqa.AVTmSleTv | 340 | USERPAT1 . | . | . |

sEEDmLqa.AVTmSleTv

|                                            |     |            |   |   |
|--------------------------------------------|-----|------------|---|---|
| A0A2Y9ENB0_PHYMC 309<br>sEEDmLqa.AVTmSleTv | 325 | USERPAT1 . | . | . |
| A0A2Y9ENB0_PHYMC 309<br>sEEDmLqa.AVTmSleTv | 325 | USERPAT1 . | . | . |
| A0A2Y9ENB0_PHYMC 309<br>sEEDmLqa.AVTmSleTv | 325 | USERPAT1 . | . | . |

|                                            |     |            |   |   |
|--------------------------------------------|-----|------------|---|---|
| A0A2Y9FV85_TRIMA 124<br>tDEEqAisrVLEaSiaEn | 141 | USERPAT1 . | . | . |
| A0A2Y9FV85_TRIMA 124<br>tDEEqAisrVLEaSiaEn | 141 | USERPAT1 . | . | . |

|                                            |     |            |   |   |
|--------------------------------------------|-----|------------|---|---|
| A0A2Y9IQI5_ENHLU 683<br>sEEElLaa.VLEmSkrEa | 699 | USERPAT1 . | . | . |
| A0A2Y9IQI5_ENHLU 683<br>sEEElLaa.VLEmSkrEa | 699 | USERPAT1 . | . | . |
| A0A2Y9IQI5_ENHLU 683<br>sEEElLaa.VLEmSkrEa | 699 | USERPAT1 . | . | . |

|                                            |     |            |   |   |
|--------------------------------------------|-----|------------|---|---|
| A0A2Y9IRQ7_ENHLU 705<br>sEEElLaa.VLEmSkrEa | 721 | USERPAT1 . | . | . |
| A0A2Y9IRQ7_ENHLU 705<br>sEEElLaa.VLEmSkrEa | 721 | USERPAT1 . | . | . |
| A0A2Y9IRQ7_ENHLU 705<br>sEEElLaa.VLEmSkrEa | 721 | USERPAT1 . | . | . |

|                                            |     |            |   |   |
|--------------------------------------------|-----|------------|---|---|
| A0A2Y9JME8_ENHLU 123<br>tDEEqAisrVLEaSiaEn | 140 | USERPAT1 . | . | . |
| A0A2Y9JME8_ENHLU 123<br>tDEEqAisrVLEaSiaEn | 140 | USERPAT1 . | . | . |

|                                            |     |            |   |   |
|--------------------------------------------|-----|------------|---|---|
| A0A2Y9JMF9_ENHLU 123<br>tDEEqAisrVLEaSiaEn | 140 | USERPAT1 . | . | . |
| A0A2Y9JMF9_ENHLU 123<br>tDEEqAisrVLEaSiaEn | 140 | USERPAT1 . | . | . |

|                                            |     |            |   |   |
|--------------------------------------------|-----|------------|---|---|
| A0A2Y9JML0_ENHLU 326<br>sEEDmLqa.AVTmSleTv | 342 | USERPAT1 . | . | . |
| A0A2Y9JML0_ENHLU 326<br>sEEDmLqa.AVTmSleTv | 342 | USERPAT1 . | . | . |
| A0A2Y9JML0_ENHLU 326<br>sEEDmLqa.AVTmSleTv | 342 | USERPAT1 . | . | . |

|                                            |     |            |   |   |
|--------------------------------------------|-----|------------|---|---|
| A0A2Y9JSS8_ENHLU 329<br>sEEDmLqa.AVTmSleTv | 345 | USERPAT1 . | . | . |
| A0A2Y9JSS8_ENHLU 329<br>sEEDmLqa.AVTmSleTv | 345 | USERPAT1 . | . | . |
| A0A2Y9JSS8_ENHLU 329<br>sEEDmLqa.AVTmSleTv | 345 | USERPAT1 . | . | . |

|                                            |     |            |   |   |
|--------------------------------------------|-----|------------|---|---|
| A0A2Y9MM93_DELLE 706<br>sEEElLaa.VLEiSkrEa | 722 | USERPAT1 . | . | . |
|--------------------------------------------|-----|------------|---|---|

|                                            |     |            |   |   |
|--------------------------------------------|-----|------------|---|---|
| A0A2Y9MM93_DELLE 706<br>sEEElLaa.VLEiSkrEa | 722 | USERPAT1 . | . | . |
| A0A2Y9MM93_DELLE 706<br>sEEElLaa.VLEiSkrEa | 722 | USERPAT1 . | . | . |
| A0A2Y9MN29_DELLE 684<br>sEEElLaa.VLEiSkrEa | 700 | USERPAT1 . | . | . |
| A0A2Y9MN29_DELLE 684<br>sEEElLaa.VLEiSkrEa | 700 | USERPAT1 . | . | . |
| A0A2Y9MN29_DELLE 684<br>sEEElLaa.VLEiSkrEa | 700 | USERPAT1 . | . | . |
| A0A2Y9MWH8_DELLE 706<br>sEEElLaa.VLEiSkrEa | 722 | USERPAT1 . | . | . |
| A0A2Y9MWH8_DELLE 706<br>sEEElLaa.VLEiSkrEa | 722 | USERPAT1 . | . | . |
| A0A2Y9MWH8_DELLE 706<br>sEEElLaa.VLEiSkrEa | 722 | USERPAT1 . | . | . |
| A0A2Y9NAE4_DELLE 123<br>tDEEqAisrVLEaSiaEn | 140 | USERPAT1 . | . | . |
| A0A2Y9NAE4_DELLE 123<br>tDEEqAisrVLEaSiaEn | 140 | USERPAT1 . | . | . |
| A0A2Y9NCV4_DELLE 322<br>sEEDmLqa.AVTmSleTv | 338 | USERPAT1 . | . | . |
| A0A2Y9NCV4_DELLE 322<br>sEEDmLqa.AVTmSleTv | 338 | USERPAT1 . | . | . |
| A0A2Y9NCV4_DELLE 322<br>sEEDmLqa.AVTmSleTv | 338 | USERPAT1 . | . | . |
| A0A2Y9NG79_DELLE 271<br>sEEDmLqa.AVTmSleTv | 287 | USERPAT1 . | . | . |
| A0A2Y9NG79_DELLE 271<br>sEEDmLqa.AVTmSleTv | 287 | USERPAT1 . | . | . |
| A0A2Y9NG79_DELLE 271<br>sEEDmLqa.AVTmSleTv | 287 | USERPAT1 . | . | . |
| A0A2Y9NKV4_DELLE 143<br>sEEDmLqa.AVTmSleTv | 159 | USERPAT1 . | . | . |
| A0A2Y9NKV4_DELLE 143<br>sEEDmLqa.AVTmSleTv | 159 | USERPAT1 . | . | . |
| A0A2Y9NKV4_DELLE 143<br>sEEDmLqa.AVTmSleTv | 159 | USERPAT1 . | . | . |
| A0A2Y9QGD7_TRIMA 152<br>tDEEqAisrVLEaSiaEn | 169 | USERPAT1 . | . | . |
| A0A2Y9QGD7_TRIMA 152<br>tDEEqAisrVLEaSiaEn | 169 | USERPAT1 . | . | . |
| A0A2Y9QLT2_TRIMA 57<br>tDEEqAisrVLEaSiaEn  | 74  | USERPAT1 . | . | . |
| A0A2Y9QLT2_TRIMA 57<br>tDEEqAisrVLEaSiaEn  | 74  | USERPAT1 . | . | . |

|                                            |     |            |   |   |
|--------------------------------------------|-----|------------|---|---|
| A0A2Y9SEV2_PHYMC 123<br>tDEEqAisrVLEaSiaEn | 140 | USERPAT1 . | . | . |
| A0A2Y9SEV2_PHYMC 123<br>tDEEqAisrVLEaSiaEn | 140 | USERPAT1 . | . | . |
| A0A2Y9SHU5_PHYMC 123<br>tDEEqAisrVLEaSiaEn | 140 | USERPAT1 . | . | . |
| A0A2Y9SHU5_PHYMC 123<br>tDEEqAisrVLEaSiaEn | 140 | USERPAT1 . | . | . |
| A0A2Y9SNP8_PHYMC 684<br>sEEElLaa.VLEiSkrEa | 700 | USERPAT1 . | . | . |
| A0A2Y9SNP8_PHYMC 684<br>sEEElLaa.VLEiSkrEa | 700 | USERPAT1 . | . | . |
| A0A2Y9SNP8_PHYMC 684<br>sEEElLaa.VLEiSkrEa | 700 | USERPAT1 . | . | . |
| A0A2Y9SS61_PHYMC 684<br>sEEElLaa.VLEiSkrEa | 700 | USERPAT1 . | . | . |
| A0A2Y9SS61_PHYMC 684<br>sEEElLaa.VLEiSkrEa | 700 | USERPAT1 . | . | . |
| A0A2Y9SS61_PHYMC 684<br>sEEElLaa.VLEiSkrEa | 700 | USERPAT1 . | . | . |
| A0A2Y9SUT9_PHYMC 706<br>sEEElLaa.VLEiSkrEa | 722 | USERPAT1 . | . | . |
| A0A2Y9SUT9_PHYMC 706<br>sEEElLaa.VLEiSkrEa | 722 | USERPAT1 . | . | . |
| A0A2Y9SUT9_PHYMC 706<br>sEEElLaa.VLEiSkrEa | 722 | USERPAT1 . | . | . |
| A0A2Y9SWY0_PHYMC 706<br>sEEElLaa.VLEiSkrEa | 722 | USERPAT1 . | . | . |
| A0A2Y9SWY0_PHYMC 706<br>sEEElLaa.VLEiSkrEa | 722 | USERPAT1 . | . | . |
| A0A2Y9SWY0_PHYMC 706<br>sEEElLaa.VLEiSkrEa | 722 | USERPAT1 . | . | . |
| A0A337RUH1_FELCA 123<br>tDEEqAisrVLEaSiaEn | 140 | USERPAT1 . | . | . |
| A0A337RUH1_FELCA 123<br>tDEEqAisrVLEaSiaEn | 140 | USERPAT1 . | . | . |
| A0A337S7J4_FELCA 123<br>tDEEqAisrVLEaSiaEn | 140 | USERPAT1 . | . | . |
| A0A337S7J4_FELCA 123<br>tDEEqAisrVLEaSiaEn | 140 | USERPAT1 . | . | . |
| A0A337S8J2_FELCA 274<br>sEEDmLqa.AVTmSleVv | 290 | USERPAT1 . | . | . |
| A0A337S8J2_FELCA 274<br>sEEDmLqa.AVTmSleVv | 290 | USERPAT1 . | . | . |
| A0A337S8J2_FELCA 274<br>sEEDmLqa.AVTmSleVv | 290 | USERPAT1 . | . | . |

sEEDmLqa.AVTmSleVv

|                                            |     |            |   |   |
|--------------------------------------------|-----|------------|---|---|
| A0A337SFZ6_FELCA 683<br>sEEElLaa.VLEiSkrEa | 699 | USERPAT1 . | . | . |
| A0A337SFZ6_FELCA 683<br>sEEElLaa.VLEiSkrEa | 699 | USERPAT1 . | . | . |
| A0A337SFZ6_FELCA 683<br>sEEElLaa.VLEiSkrEa | 699 | USERPAT1 . | . | . |
| A0A337SHM7_FELCA 123<br>tDEEqAisrVLEaSiaEn | 140 | USERPAT1 . | . | . |
| A0A337SHM7_FELCA 123<br>tDEEqAisrVLEaSiaEn | 140 | USERPAT1 . | . | . |
| A0A337SMY3_FELCA 255<br>sEEDmLqa.AVTmSleVv | 271 | USERPAT1 . | . | . |
| A0A337SMY3_FELCA 255<br>sEEDmLqa.AVTmSleVv | 271 | USERPAT1 . | . | . |
| A0A337SMY3_FELCA 255<br>sEEDmLqa.AVTmSleVv | 271 | USERPAT1 . | . | . |
| A0A337SN16_FELCA 310<br>sEEDmLqa.AVTmSleVv | 326 | USERPAT1 . | . | . |
| A0A337SN16_FELCA 310<br>sEEDmLqa.AVTmSleVv | 326 | USERPAT1 . | . | . |
| A0A337SN16_FELCA 310<br>sEEDmLqa.AVTmSleVv | 326 | USERPAT1 . | . | . |
| A0A337SPY1_FELCA 270<br>sEEDmLqa.AVTmSleVv | 286 | USERPAT1 . | . | . |
| A0A337SPY1_FELCA 270<br>sEEDmLqa.AVTmSleVv | 286 | USERPAT1 . | . | . |
| A0A337SPY1_FELCA 270<br>sEEDmLqa.AVTmSleVv | 286 | USERPAT1 . | . | . |
| A0A337SSU9_FELCA 150<br>tDEEqAisrVLEaSiaEn | 167 | USERPAT1 . | . | . |
| A0A337SSU9_FELCA 150<br>tDEEqAisrVLEaSiaEn | 167 | USERPAT1 . | . | . |
| A0A340WV50_LIPVE 706<br>sEEElLaa.VLEiSkrEa | 722 | USERPAT1 . | . | . |
| A0A340WV50_LIPVE 706<br>sEEElLaa.VLEiSkrEa | 722 | USERPAT1 . | . | . |
| A0A340WV50_LIPVE 706<br>sEEElLaa.VLEiSkrEa | 722 | USERPAT1 . | . | . |
| A0A340WZ65_LIPVE 123<br>tDEEqAisrVLEaSiaEn | 140 | USERPAT1 . | . | . |
| A0A340WZ65_LIPVE 123<br>tDEEqAisrVLEaSiaEn | 140 | USERPAT1 . | . | . |
| A0A340X0E7_LIPVE 330<br>sEEDmLqa.AVTmSleTv | 346 | USERPAT1 . | . | . |



|                                            |     |                |
|--------------------------------------------|-----|----------------|
| A0A340X0E7_LIPVE 330<br>sEEDmLqa.AVTmSleTv | 346 | USERPAT1 . . . |
| A0A340X0E7_LIPVE 330<br>sEEDmLqa.AVTmSleTv | 346 | USERPAT1 . . . |
| A0A340X0F2_LIPVE 260<br>sEEDmLqa.AVTmSleTv | 276 | USERPAT1 . . . |
| A0A340X0F2_LIPVE 260<br>sEEDmLqa.AVTmSleTv | 276 | USERPAT1 . . . |
| A0A340X0F2_LIPVE 260<br>sEEDmLqa.AVTmSleTv | 276 | USERPAT1 . . . |
| A0A340X338_LIPVE 141<br>tDEEqAisrVLEaSiaEn | 158 | USERPAT1 . . . |
| A0A340X338_LIPVE 141<br>tDEEqAisrVLEaSiaEn | 158 | USERPAT1 . . . |
| A0A340X484_LIPVE 315<br>sEEDmLqa.AVTmSleTv | 331 | USERPAT1 . . . |
| A0A340X484_LIPVE 315<br>sEEDmLqa.AVTmSleTv | 331 | USERPAT1 . . . |
| A0A340X484_LIPVE 315<br>sEEDmLqa.AVTmSleTv | 331 | USERPAT1 . . . |
| A0A340X644_LIPVE 326<br>sEEDmLqa.AVTmSleTv | 342 | USERPAT1 . . . |
| A0A340X644_LIPVE 326<br>sEEDmLqa.AVTmSleTv | 342 | USERPAT1 . . . |
| A0A340X644_LIPVE 326<br>sEEDmLqa.AVTmSleTv | 342 | USERPAT1 . . . |
| A0A340X648_LIPVE 279<br>sEEDmLqa.AVTmSleTv | 295 | USERPAT1 . . . |
| A0A340X648_LIPVE 279<br>sEEDmLqa.AVTmSleTv | 295 | USERPAT1 . . . |
| A0A340X648_LIPVE 279<br>sEEDmLqa.AVTmSleTv | 295 | USERPAT1 . . . |
| A0A340X6S4_LIPVE 325<br>sEEDmLqa.AVTmSleTv | 341 | USERPAT1 . . . |
| A0A340X6S4_LIPVE 325<br>sEEDmLqa.AVTmSleTv | 341 | USERPAT1 . . . |
| A0A340X6S4_LIPVE 325<br>sEEDmLqa.AVTmSleTv | 341 | USERPAT1 . . . |
| A0A340X6S9_LIPVE 275<br>sEEDmLqa.AVTmSleTv | 291 | USERPAT1 . . . |
| A0A340X6S9_LIPVE 275<br>sEEDmLqa.AVTmSleTv | 291 | USERPAT1 . . . |
| A0A340X6S9_LIPVE 275<br>sEEDmLqa.AVTmSleTv | 291 | USERPAT1 . . . |
| A0A384AKT3_BALAS 706<br>sEEElLaa.VLEiSktEa | 722 | USERPAT1 . . . |

|                                            |     |            |   |   |
|--------------------------------------------|-----|------------|---|---|
| A0A384AKT3_BALAS 706<br>sEEElLaa.VLEiSktEa | 722 | USERPAT1 . | . | . |
| A0A384AL14_BALAS 89<br>sEDEaLqr.ALElSlaEa  | 105 | USERPAT1 . | . | . |
| A0A384C1U5_URSMA 243<br>sEDEaLqr.ALElSlaEn | 259 | USERPAT1 . | . | . |
| A0A384C2P1_URSMA 705<br>sEEElLaa.VLEmSkrEs | 721 | USERPAT1 . | . | . |
| A0A384C2P1_URSMA 705<br>sEEElLaa.VLEmSkrEs | 721 | USERPAT1 . | . | . |
| A0A384C2P1_URSMA 705<br>sEEElLaa.VLEmSkrEs | 721 | USERPAT1 . | . | . |
| A0A384CPI0_URSMA 346<br>sEEDmLqa.AVTlSleTv | 362 | USERPAT1 . | . | . |
| A0A384CPI0_URSMA 346<br>sEEDmLqa.AVTlSleTv | 362 | USERPAT1 . | . | . |
| A0A384CPI0_URSMA 346<br>sEEDmLqa.AVTlSleTv | 362 | USERPAT1 . | . | . |
| A0A3B1KDQ4_ASTMX 664<br>nDDEmLaa.VLEmSrqEa | 680 | USERPAT1 . | . | . |
| A0A3B1KDQ4_ASTMX 664<br>nDDEmLaa.VLEmSrqEa | 680 | USERPAT1 . | . | . |
| A0A3B1KDQ4_ASTMX 664<br>nDDEmLaa.VLEmSrqEa | 680 | USERPAT1 . | . | . |
| A0A3B3DMP5_ORYME 96<br>tDEEqAisrVLEaSiaEn  | 113 | USERPAT1 . | . | . |
| A0A3B3DMP5_ORYME 96<br>tDEEqAisrVLEaSiaEn  | 113 | USERPAT1 . | . | . |
| A0A3B3DZF9_ORYME 680<br>iDDDeMlaaVLEmSrqEa | 697 | USERPAT1 . | . | . |
| A0A3B3DZF9_ORYME 680<br>iDDDeMlaaVLEmSrqEa | 697 | USERPAT1 . | . | . |
| A0A3B3DZF9_ORYME 680<br>iDDDeMlaaVLEmSrqEa | 697 | USERPAT1 . | . | . |
| A0A3B3RSL1_9TELE 116<br>tDEEqAisrVLEaSiaEn | 133 | USERPAT1 . | . | . |
| A0A3B3RSL1_9TELE 116<br>tDEEqAisrVLEaSiaEn | 133 | USERPAT1 . | . | . |
| A0A3B3RSV1_9TELE 122<br>tDEEqAisrVLEaSiaEn | 139 | USERPAT1 . | . | . |
| A0A3B3RSV1_9TELE 122<br>tDEEqAisrVLEaSiaEn | 139 | USERPAT1 . | . | . |
| A0A3B3RV06_9TELE 116<br>tDEEqAisrVLEaSiaEn | 133 | USERPAT1 . | . | . |

|                                            |     |            |   |   |
|--------------------------------------------|-----|------------|---|---|
| A0A3B3RV06_9TELE 116<br>tDEEqAisrVLEaSiaEn | 133 | USERPAT1 . | . | . |
| A0A3B3VXF7_9TELE 680<br>nDDEmLaa.VLEmSreEa | 696 | USERPAT1 . | . | . |
| A0A3B3VXF7_9TELE 680<br>nDDEmLaa.VLEmSreEa | 696 | USERPAT1 . | . | . |
| A0A3B3VXF7_9TELE 680<br>nDDEmLaa.VLEmSreEa | 696 | USERPAT1 . | . | . |
| A0A3B3WZ97_9TELE 680<br>nDDEmLaa.VLEmSrqEa | 696 | USERPAT1 . | . | . |
| A0A3B3WZ97_9TELE 680<br>nDDEmLaa.VLEmSrqEa | 696 | USERPAT1 . | . | . |
| A0A3B3WZ97_9TELE 680<br>nDDEmLaa.VLEmSrqEa | 696 | USERPAT1 . | . | . |
| A0A3B4DWK9_PYGNA 674<br>nDDEmLaa.VLEmSrhDt | 690 | USERPAT1 . | . | . |
| A0A3B4DWK9_PYGNA 674<br>nDDEmLaa.VLEmSrhDt | 690 | USERPAT1 . | . | . |
| A0A3B4DWK9_PYGNA 674<br>nDDEmLaa.VLEmSrhDt | 690 | USERPAT1 . | . | . |
| A0A3B4DXK6_PYGNA 675<br>nDDEmLaa.VLEmSrhDt | 691 | USERPAT1 . | . | . |
| A0A3B4DXK6_PYGNA 675<br>nDDEmLaa.VLEmSrhDt | 691 | USERPAT1 . | . | . |
| A0A3B4DXK6_PYGNA 675<br>nDDEmLaa.VLEmSrhDt | 691 | USERPAT1 . | . | . |
| A0A3B4G0S9_9CICH 687<br>nDDEmLaa.VLEiSrqEa | 703 | USERPAT1 . | . | . |
| A0A3B4G0S9_9CICH 687<br>nDDEmLaa.VLEiSrqEa | 703 | USERPAT1 . | . | . |
| A0A3B4G0S9_9CICH 687<br>nDDEmLaa.VLEiSrqEa | 703 | USERPAT1 . | . | . |
| A0A3B4TVV6_SERDU 685<br>nDDEmLaa.VLEmSrqEa | 701 | USERPAT1 . | . | . |
| A0A3B4TVV6_SERDU 685<br>nDDEmLaa.VLEmSrqEa | 701 | USERPAT1 . | . | . |
| A0A3B4TVV6_SERDU 685<br>nDDEmLaa.VLEmSrqEa | 701 | USERPAT1 . | . | . |
| A0A3B4Y2G5_SERLL 685<br>nDDEmLaa.VLEmSrqEa | 701 | USERPAT1 . | . | . |
| A0A3B4Y2G5_SERLL 685<br>nDDEmLaa.VLEmSrqEa | 701 | USERPAT1 . | . | . |
| A0A3B4Y2G5_SERLL 685<br>nDDEmLaa.VLEmSrqEa | 701 | USERPAT1 . | . | . |
| A0A3B5AJH2_9TELE 687<br>nDDEmLaa.VLEmSrqEa | 703 | USERPAT1 . | . | . |

|                                             |      |            |   |   |
|---------------------------------------------|------|------------|---|---|
| A0A3B5AJH2_9TELE 687<br>nDDEmLaa.VLEmSrqEa  | 703  | USERPAT1 . | . | . |
| A0A3B5AJH2_9TELE 687<br>nDDEmLaa.VLEmSrqEa  | 703  | USERPAT1 . | . | . |
| A0A3L8SJU7_CHLGU 126<br>tDEEqAisrVLEaSiaEn  | 143  | USERPAT1 . | . | . |
| A0A3L8SJU7_CHLGU 126<br>tDEEqAisrVLEaSiaEn  | 143  | USERPAT1 . | . | . |
| A0A3L8SNF6_CHLGU 714<br>sEDElLaa.VLEiSkrEa  | 730  | USERPAT1 . | . | . |
| A0A3L8SNF6_CHLGU 714<br>sEDElLaa.VLEiSkrEa  | 730  | USERPAT1 . | . | . |
| A0A3L8SNF6_CHLGU 714<br>sEDElLaa.VLEiSkrEa  | 730  | USERPAT1 . | . | . |
| A0A3M0L0W4_HIRRU 627<br>sEDElLaa.VLEiSkrEa  | 643  | USERPAT1 . | . | . |
| A0A3M0L0W4_HIRRU 627<br>sEDElLaa.VLEiSkrEa  | 643  | USERPAT1 . | . | . |
| A0A3M0L0W4_HIRRU 627<br>sEDElLaa.VLEiSkrEa  | 643  | USERPAT1 . | . | . |
| A0A3M9YCH6_9PEZI 1166<br>dDDEdFkr.ALEaSkiPs | 1182 | USERPAT1 . | . | . |
| A0A3M9YCH6_9PEZI 1166<br>dDDEdFkr.ALEaSkiPs | 1182 | USERPAT1 . | . | . |
| A0A3M9YCH6_9PEZI 1166<br>dDDEdFkr.ALEaSkiPs | 1182 | USERPAT1 . | . | . |
| A0A3P8NBI3_ASTCA 96<br>tDEEqAisrVLEaSiaEn   | 113  | USERPAT1 . | . | . |
| A0A3P8NBI3_ASTCA 96<br>tDEEqAisrVLEaSiaEn   | 113  | USERPAT1 . | . | . |
| A0A3P8NFM1_ASTCA 621<br>nDDEmLaa.VLEiSrqEa  | 637  | USERPAT1 . | . | . |
| A0A3P8NFM1_ASTCA 621<br>nDDEmLaa.VLEiSrqEa  | 637  | USERPAT1 . | . | . |
| A0A3P8NFM1_ASTCA 621<br>nDDEmLaa.VLEiSrqEa  | 637  | USERPAT1 . | . | . |
| A0A3P8S1N9_AMPPE 625<br>nDDEmLaa.VLEmSrqEa  | 641  | USERPAT1 . | . | . |
| A0A3P8S1N9_AMPPE 625<br>nDDEmLaa.VLEmSrqEa  | 641  | USERPAT1 . | . | . |
| A0A3P8S1N9_AMPPE 625<br>nDDEmLaa.VLEmSrqEa  | 641  | USERPAT1 . | . | . |
| A0A3P8S300_AMPPE 687<br>nDDEmLaa.VLEmSrqEa  | 703  | USERPAT1 . | . | . |
| A0A3P8S300_AMPPE 687<br>nDDEmLaa.VLEmSrqEa  | 703  | USERPAT1 . | . | . |

|                                            |     |            |   |   |
|--------------------------------------------|-----|------------|---|---|
| A0A3P8S300_AMPPE 687<br>nDDEmLaa.VLEmSrqEa | 703 | USERPAT1 . | . | . |
| A0A3P8WGD3_CYNSE 653<br>nDDEmLaa.VLEmSrrEa | 669 | USERPAT1 . | . | . |
| A0A3P8WGD3_CYNSE 653<br>nDDEmLaa.VLEmSrrEa | 669 | USERPAT1 . | . | . |
| A0A3P8Y9G8_ESOLU 681<br>nDEDmLaa.VLEmSrqDa | 697 | USERPAT1 . | . | . |
| A0A3P8Y9G8_ESOLU 681<br>nDEDmLaa.VLEmSrqDa | 697 | USERPAT1 . | . | . |
| A0A3P8Y9G8_ESOLU 681<br>nDEDmLaa.VLEmSrqDa | 697 | USERPAT1 . | . | . |
| A0A3P9A0L5_ESOLU 641<br>nDEDmLaa.VLEmSrqDa | 657 | USERPAT1 . | . | . |
| A0A3P9A0L5_ESOLU 641<br>nDEDmLaa.VLEmSrqDa | 657 | USERPAT1 . | . | . |
| A0A3P9A0L5_ESOLU 641<br>nDEDmLaa.VLEmSrqDa | 657 | USERPAT1 . | . | . |
| A0A3P9CAX5_9CICH 686<br>nDDEmLaa.VLEiSrqEa | 702 | USERPAT1 . | . | . |
| A0A3P9CAX5_9CICH 686<br>nDDEmLaa.VLEiSrqEa | 702 | USERPAT1 . | . | . |
| A0A3P9CAX5_9CICH 686<br>nDDEmLaa.VLEiSrqEa | 702 | USERPAT1 . | . | . |
| A0A3P9MUX0_POERE 683<br>nDDEmLaa.VLEmSrqEa | 699 | USERPAT1 . | . | . |
| A0A3P9MUX0_POERE 683<br>nDDEmLaa.VLEmSrqEa | 699 | USERPAT1 . | . | . |
| A0A3P9MUX0_POERE 683<br>nDDEmLaa.VLEmSrqEa | 699 | USERPAT1 . | . | . |
| A0A3Q0CKB2_MESAU 682<br>sEEEvLaa.VLEiSrrEa | 698 | USERPAT1 . | . | . |
| A0A3Q0CKB2_MESAU 682<br>sEEEvLaa.VLEiSrrEa | 698 | USERPAT1 . | . | . |
| A0A3Q0CKB2_MESAU 682<br>sEEEvLaa.VLEiSrrEa | 698 | USERPAT1 . | . | . |
| A0A3Q0CM19_MESAU 123<br>tDEEqAisrVLEaSiaEn | 140 | USERPAT1 . | . | . |
| A0A3Q0CM19_MESAU 123<br>tDEEqAisrVLEaSiaEn | 140 | USERPAT1 . | . | . |
| A0A3Q0CR36_MESAU 704<br>sEEEvLaa.VLEiSrrEa | 720 | USERPAT1 . | . | . |
| A0A3Q0CR36_MESAU 704<br>sEEEvLaa.VLEiSrrEa | 720 | USERPAT1 . | . | . |
| A0A3Q0CR36_MESAU 704<br>sEEEvLaa.VLEiSrrEa | 720 | USERPAT1 . | . | . |

|                       |     |            |   |   |
|-----------------------|-----|------------|---|---|
| A0A3Q0E644_TARSY 113  | 130 | USERPAT1 . | . | . |
| tDEEqAisrVLEaSiaEn    |     |            |   |   |
| A0A3Q0E644_TARSY 113  | 130 | USERPAT1 . | . | . |
| tDEEqAisrVLEaSiaEn    |     |            |   |   |
| A0A3Q0FMH0_ALLSI 589  | 605 | USERPAT1 . | . | . |
| sEDeLLaa.VLEiSkrEa    |     |            |   |   |
| A0A3Q0FMH0_ALLSI 589  | 605 | USERPAT1 . | . | . |
| sEDeLLaa.VLEiSkrEa    |     |            |   |   |
| A0A3Q0FMH0_ALLSI 589  | 605 | USERPAT1 . | . | . |
| sEDeLLaa.VLEiSkrEa    |     |            |   |   |
| A0A3Q0RDB8_AMPIC 628  | 644 | USERPAT1 . | . | . |
| nDDEmLaa.VLEmSrqEa    |     |            |   |   |
| A0A3Q0RDB8_AMPIC 628  | 644 | USERPAT1 . | . | . |
| nDDEmLaa.VLEmSrqEa    |     |            |   |   |
| A0A3Q0RDB8_AMPIC 628  | 644 | USERPAT1 . | . | . |
| nDDEmLaa.VLEmSrqEa    |     |            |   |   |
| A0A3Q1BFK3_AMPOC 687  | 703 | USERPAT1 . | . | . |
| nDDEmLaa.VLEmSrqEa    |     |            |   |   |
| A0A3Q1BFK3_AMPOC 687  | 703 | USERPAT1 . | . | . |
| nDDEmLaa.VLEmSrqEa    |     |            |   |   |
| A0A3Q1BFK3_AMPOC 687  | 703 | USERPAT1 . | . | . |
| nDDEmLaa.VLEmSrqEa    |     |            |   |   |
| A0A3Q1GR08_9TELE 688  | 704 | USERPAT1 . | . | . |
| nDDEmLaa.VLEmSrqEa    |     |            |   |   |
| A0A3Q1GR08_9TELE 688  | 704 | USERPAT1 . | . | . |
| nDDEmLaa.VLEmSrqEa    |     |            |   |   |
| A0A3Q1GR08_9TELE 688  | 704 | USERPAT1 . | . | . |
| nDDEmLaa.VLEmSrqEa    |     |            |   |   |
| A0A3Q1HVVU0_ANATE 684 | 700 | USERPAT1 . | . | . |
| nDDEmLaa.VLEmSrqEa    |     |            |   |   |
| A0A3Q1HVVU0_ANATE 684 | 700 | USERPAT1 . | . | . |
| nDDEmLaa.VLEmSrqEa    |     |            |   |   |
| A0A3Q1HVVU0_ANATE 684 | 700 | USERPAT1 . | . | . |
| nDDEmLaa.VLEmSrqEa    |     |            |   |   |
| A0A3Q1I6Z2_ANATE 682  | 698 | USERPAT1 . | . | . |
| nDDEmLaa.VLEmSrqEa    |     |            |   |   |
| A0A3Q1I6Z2_ANATE 682  | 698 | USERPAT1 . | . | . |
| nDDEmLaa.VLEmSrqEa    |     |            |   |   |
| A0A3Q1I6Z2_ANATE 682  | 698 | USERPAT1 . | . | . |
| nDDEmLaa.VLEmSrqEa    |     |            |   |   |
| A0A3Q1LHR5_BOVIN 151  | 168 | USERPAT1 . | . | . |
| tDEEqAisrVLEaSiaEn    |     |            |   |   |
| A0A3Q1LHR5_BOVIN 151  | 168 | USERPAT1 . | . | . |
| tDEEqAisrVLEaSiaEn    |     |            |   |   |
| A0A3Q1MMX0_BOVIN 123  | 140 | USERPAT1 . | . | . |

|                                                                                                                                        |     |            |   |   |
|----------------------------------------------------------------------------------------------------------------------------------------|-----|------------|---|---|
| tDEEqAisrVLEaSiaEn<br>A0A3Q1MMX0_BOVIN 123<br>tDEEqAisrVLEaSiaEn                                                                       | 140 | USERPAT1 . | . | . |
| A0A3Q2EJH3_CYPVA 681<br>nDEEmLaa.VLEmSrrEa<br>A0A3Q2EJH3_CYPVA 681<br>nDEEmLaa.VLEmSrrEa<br>A0A3Q2EJH3_CYPVA 681<br>nDEEmLaa.VLEmSrrEa | 697 | USERPAT1 . | . | . |
| A0A3Q2GUR0_HORSE 347<br>sEEDmLra.AVTmSleTv<br>A0A3Q2GUR0_HORSE 347<br>sEEDmLra.AVTmSleTv<br>A0A3Q2GUR0_HORSE 347<br>sEEDmLra.AVTmSleTv | 363 | USERPAT1 . | . | . |
| A0A3Q2H0C3_HORSE 57<br>tDEEqAisrVLEaSiaEn<br>A0A3Q2H0C3_HORSE 57<br>tDEEqAisrVLEaSiaEn                                                 | 74  | USERPAT1 . | . | . |
| A0A3Q2HQZ4_HORSE 97<br>tDEEqAisrVLEaSiaEn<br>A0A3Q2HQZ4_HORSE 97<br>tDEEqAisrVLEaSiaEn                                                 | 114 | USERPAT1 . | . | . |
| A0A3Q2HYB5_HORSE 706<br>sEEElLaa.VLEiSkrEs<br>A0A3Q2HYB5_HORSE 706<br>sEEElLaa.VLEiSkrEs<br>A0A3Q2HYB5_HORSE 706<br>sEEElLaa.VLEiSkrEs | 722 | USERPAT1 . | . | . |
| A0A3Q2HYS1_HORSE 123<br>tDEEqAisrVLEaSiaEn<br>A0A3Q2HYS1_HORSE 123<br>tDEEqAisrVLEaSiaEn                                               | 140 | USERPAT1 . | . | . |
| A0A3Q2HZ85_HORSE 128<br>tDEEqAisrVLEaSiaEn<br>A0A3Q2HZ85_HORSE 128<br>tDEEqAisrVLEaSiaEn                                               | 145 | USERPAT1 . | . | . |
| A0A3Q2I9L4_HORSE 128<br>tDEEqAisrVLEaSiaEn<br>A0A3Q2I9L4_HORSE 128<br>tDEEqAisrVLEaSiaEn                                               | 145 | USERPAT1 . | . | . |
| A0A3Q2IK66_HORSE 662<br>sEEElLaa.VLEiSkrEs<br>A0A3Q2IK66_HORSE 662<br>sEEElLaa.VLEiSkrEs                                               | 678 | USERPAT1 . | . | . |

|                                            |     |            |   |   |
|--------------------------------------------|-----|------------|---|---|
| A0A3Q2IK66_HORSE 662<br>sEEElLaa.VLEiSkrEs | 678 | USERPAT1 . | . | . |
| A0A3Q2L1L7_HORSE 652<br>sEEElLaa.VLEiSkrEs | 668 | USERPAT1 . | . | . |
| A0A3Q2L1L7_HORSE 652<br>sEEElLaa.VLEiSkrEs | 668 | USERPAT1 . | . | . |
| A0A3Q2L1L7_HORSE 652<br>sEEElLaa.VLEiSkrEs | 668 | USERPAT1 . | . | . |
| A0A3Q2LCD7_HORSE 57<br>tDEEqAisrVLEaSiaEn  | 74  | USERPAT1 . | . | . |
| A0A3Q2LCD7_HORSE 57<br>tDEEqAisrVLEaSiaEn  | 74  | USERPAT1 . | . | . |
| A0A3Q3B3M1_KRYMA 683<br>nDDEmLaa.VLEmSrqEa | 699 | USERPAT1 . | . | . |
| A0A3Q3B3M1_KRYMA 683<br>nDDEmLaa.VLEmSrqEa | 699 | USERPAT1 . | . | . |
| A0A3Q3B3M1_KRYMA 683<br>nDDEmLaa.VLEmSrqEa | 699 | USERPAT1 . | . | . |
| A0A3Q3BH33_KRYMA 670<br>nDDEmLaa.VLEmSrqEa | 686 | USERPAT1 . | . | . |
| A0A3Q3BH33_KRYMA 670<br>nDDEmLaa.VLEmSrqEa | 686 | USERPAT1 . | . | . |
| A0A3Q3BH33_KRYMA 670<br>nDDEmLaa.VLEmSrqEa | 686 | USERPAT1 . | . | . |
| A0A3Q3D0I2_HAPBU 686<br>nDDEmLaa.VLEiSrqEa | 702 | USERPAT1 . | . | . |
| A0A3Q3D0I2_HAPBU 686<br>nDDEmLaa.VLEiSrqEa | 702 | USERPAT1 . | . | . |
| A0A3Q3D0I2_HAPBU 686<br>nDDEmLaa.VLEiSrqEa | 702 | USERPAT1 . | . | . |
| A0A3Q3E4J5_9LABR 668<br>nDDEmLaa.VLEmSrqEv | 684 | USERPAT1 . | . | . |
| A0A3Q3E4J5_9LABR 668<br>nDDEmLaa.VLEmSrqEv | 684 | USERPAT1 . | . | . |
| A0A3Q3E4J5_9LABR 668<br>nDDEmLaa.VLEmSrqEv | 684 | USERPAT1 . | . | . |
| A0A3Q3M0Z7_9TELE 684<br>nDDEmLaa.VLEiSrqEa | 700 | USERPAT1 . | . | . |
| A0A3Q3M0Z7_9TELE 684<br>nDDEmLaa.VLEiSrqEa | 700 | USERPAT1 . | . | . |
| A0A3Q3M0Z7_9TELE 684<br>nDDEmLaa.VLEiSrqEa | 700 | USERPAT1 . | . | . |
| A0A3Q3VY28_MOLML 632<br>nDDEmLda.VLEmSqqEa | 648 | USERPAT1 . | . | . |
| A0A3Q3VY28_MOLML 632<br>nDDEmLda.VLEmSqqEa | 648 | USERPAT1 . | . | . |



|                                         |     |     |            |   |   |
|-----------------------------------------|-----|-----|------------|---|---|
| A0A3Q3VY28_MOLML<br>nDDEmLda.VLEmSqqEa  | 632 | 648 | USERPAT1 . | . | . |
| A0A3Q4HLL0_NE0BR<br>nDDEmLaa.VLEiSrqEa  | 643 | 659 | USERPAT1 . | . | . |
| A0A3Q4HLL0_NE0BR<br>nDDEmLaa.VLEiSrqEa  | 643 | 659 | USERPAT1 . | . | . |
| A0A3Q4HLL0_NE0BR<br>nDDEmLaa.VLEiSrqEa  | 643 | 659 | USERPAT1 . | . | . |
| A0A3Q7R581_VULVU<br>sEEDmLqa.AVTmSleTv  | 333 | 349 | USERPAT1 . | . | . |
| A0A3Q7R581_VULVU<br>sEEDmLqa.AVTmSleTv  | 333 | 349 | USERPAT1 . | . | . |
| A0A3Q7R581_VULVU<br>sEEDmLqa.AVTmSleTv  | 333 | 349 | USERPAT1 . | . | . |
| A0A3Q7R7A6_VULVU<br>sEEDmLqa.AVTmSleTv  | 318 | 334 | USERPAT1 . | . | . |
| A0A3Q7R7A6_VULVU<br>sEEDmLqa.AVTmSleTv  | 318 | 334 | USERPAT1 . | . | . |
| A0A3Q7R7A6_VULVU<br>sEEDmLqa.AVTmSleTv  | 318 | 334 | USERPAT1 . | . | . |
| A0A3Q7R7B1_VULVU<br>sEEDmLqa.AVTmSleTv  | 154 | 170 | USERPAT1 . | . | . |
| A0A3Q7R7B1_VULVU<br>sEEDmLqa.AVTmSleTv  | 154 | 170 | USERPAT1 . | . | . |
| A0A3Q7R7B1_VULVU<br>sEEDmLqa.AVTmSleTv  | 154 | 170 | USERPAT1 . | . | . |
| A0A3Q7SHU8_VULVU<br>sEEDmLqa.AVTmSleTv  | 332 | 348 | USERPAT1 . | . | . |
| A0A3Q7SHU8_VULVU<br>sEEDmLqa.AVTmSleTv  | 332 | 348 | USERPAT1 . | . | . |
| A0A3Q7SHU8_VULVU<br>sEEDmLqa.AVTmSleTv  | 332 | 348 | USERPAT1 . | . | . |
| A0A3Q7SHV3_VULVU<br>sEEDmLqa.AVTmSleTv  | 282 | 298 | USERPAT1 . | . | . |
| A0A3Q7SHV3_VULVU<br>sEEDmLqa.AVTmSleTv  | 282 | 298 | USERPAT1 . | . | . |
| A0A3Q7SHV3_VULVU<br>sEEDmLqa.AVTmSleTv  | 282 | 298 | USERPAT1 . | . | . |
| A0A3Q7SQN0_VULVU<br>sEEEllLaa.VLEmSkrEa | 684 | 700 | USERPAT1 . | . | . |
| A0A3Q7SQN0_VULVU<br>sEEEllLaa.VLEmSkrEa | 684 | 700 | USERPAT1 . | . | . |
| A0A3Q7SQN0_VULVU<br>sEEEllLaa.VLEmSkrEa | 684 | 700 | USERPAT1 . | . | . |
| A0A3Q7TRU5_VULVU<br>sEEEllLaa.VLEmSkrEa | 706 | 722 | USERPAT1 . | . | . |

|                                            |     |            |   |   |
|--------------------------------------------|-----|------------|---|---|
| A0A3Q7TRU5_VULVU 706<br>sEEElLaa.VLEmSkrEa | 722 | USERPAT1 . | . | . |
| A0A3Q7TRU5_VULVU 706<br>sEEElLaa.VLEmSkrEa | 722 | USERPAT1 . | . | . |
| A0A3Q7UH43_URSAR 197<br>sEDEaLqr.ALElSlaEn | 213 | USERPAT1 . | . | . |
| A0A3Q7V6G1_URSAR 197<br>sEDEaLqr.ALElSlaEn | 213 | USERPAT1 . | . | . |
| A0A3Q7V6K7_URSAR 705<br>sEEElLaa.VLEmSkrEs | 721 | USERPAT1 . | . | . |
| A0A3Q7V6K7_URSAR 705<br>sEEElLaa.VLEmSkrEs | 721 | USERPAT1 . | . | . |
| A0A3Q7V6K7_URSAR 705<br>sEEElLaa.VLEmSkrEs | 721 | USERPAT1 . | . | . |
| A0A3Q7VYY1_URSAR 683<br>sEEElLaa.VLEmSkrEs | 699 | USERPAT1 . | . | . |
| A0A3Q7VYY1_URSAR 683<br>sEEElLaa.VLEmSkrEs | 699 | USERPAT1 . | . | . |
| A0A3Q7VYY1_URSAR 683<br>sEEElLaa.VLEmSkrEs | 699 | USERPAT1 . | . | . |
| A0A3Q7WBN1_URSAR 705<br>sEEElLaa.VLEmSkrEs | 721 | USERPAT1 . | . | . |
| A0A3Q7WBN1_URSAR 705<br>sEEElLaa.VLEmSkrEs | 721 | USERPAT1 . | . | . |
| A0A3Q7WBN1_URSAR 705<br>sEEElLaa.VLEmSkrEs | 721 | USERPAT1 . | . | . |
| A0A3Q7XA14_URSAR 326<br>sEEDmLqa.AVTlSleTv | 342 | USERPAT1 . | . | . |
| A0A3Q7XA14_URSAR 326<br>sEEDmLqa.AVTlSleTv | 342 | USERPAT1 . | . | . |
| A0A3Q7XA14_URSAR 326<br>sEEDmLqa.AVTlSleTv | 342 | USERPAT1 . | . | . |
| A0A3Q7XA19_URSAR 148<br>sEEDmLqa.AVTlSleTv | 164 | USERPAT1 . | . | . |
| A0A3Q7XA19_URSAR 148<br>sEEDmLqa.AVTlSleTv | 164 | USERPAT1 . | . | . |
| A0A3Q7XA19_URSAR 148<br>sEEDmLqa.AVTlSleTv | 164 | USERPAT1 . | . | . |
| A0A3Q7XVY1_URSAR 276<br>sEEDmLqa.AVTlSleTv | 292 | USERPAT1 . | . | . |
| A0A3Q7XVY1_URSAR 276<br>sEEDmLqa.AVTlSleTv | 292 | USERPAT1 . | . | . |
| A0A3Q7XVY1_URSAR 276<br>sEEDmLqa.AVTlSleTv | 292 | USERPAT1 . | . | . |
| A0A3Q7Y3E5_URSAR 327                       | 343 | USERPAT1 . | . | . |

|                                            |     |            |   |   |
|--------------------------------------------|-----|------------|---|---|
| sEEDmLqa.AVTlSleTv<br>A0A3Q7Y3E5_URSAR 327 | 343 | USERPAT1 . | . | . |
| sEEDmLqa.AVTlSleTv<br>A0A3Q7Y3E5_URSAR 327 | 343 | USERPAT1 . | . | . |
| sEEDmLqa.AVTlSleTv                         |     |            |   |   |
| A0A3R7PRM8_PENVA 1<br>mDDdLlslALHmSaqEa    | 18  | USERPAT1 . | . | . |
| A0A3R7PRM8_PENVA 1<br>mDDdLlslALHmSaqEa    | 18  | USERPAT1 . | . | . |
| A0A401P2Z5_SCYT0 227<br>dDEEsLqr.ALtlSrqHm | 243 | USERPAT1 . | . | . |
| A0A401P2Z5_SCYT0 227<br>dDEEsLqr.ALtlSrqHm | 243 | USERPAT1 . | . | . |
| A0A401RIH8_CHIPU 643<br>sEDElLaa.VLEiSkrEt | 659 | USERPAT1 . | . | . |
| A0A401RIH8_CHIPU 643<br>sEDElLaa.VLEiSkrEt | 659 | USERPAT1 . | . | . |
| A0A401RIH8_CHIPU 643<br>sEDElLaa.VLEiSkrEt | 659 | USERPAT1 . | . | . |
| A0A401RIH8_CHIPU 643<br>sEDElLaa.VLEiSkrEt | 659 | USERPAT1 . | . | . |
| A0A401SMB2_CHIPU 50<br>eEDEnLqr.ALEqSrkes  | 66  | USERPAT1 . | . | . |
| A0A401SMB2_CHIPU 50<br>eEDEnLqr.ALEqSrkes  | 66  | USERPAT1 . | . | . |
| A0A401SSW7_CHIPU 318<br>eDDEnLqr.ALtlSrqHm | 334 | USERPAT1 . | . | . |
| A0A401SSW7_CHIPU 318<br>eDDEnLqr.ALtlSrqHm | 334 | USERPAT1 . | . | . |
| A0A402F317_9SAUR 711<br>nEDElFaa.VLEiSkrEa | 727 | USERPAT1 . | . | . |
| A0A402F317_9SAUR 711<br>nEDElFaa.VLEiSkrEa | 727 | USERPAT1 . | . | . |
| A0A452CL78_BALAS 198<br>sEDEaLqr.ALElSlaEa | 214 | USERPAT1 . | . | . |
| A0A452DJ84_BOVIN 706<br>sEEElLaa.VLEiSkrEa | 722 | USERPAT1 . | . | . |
| A0A452DJ84_BOVIN 706<br>sEEElLaa.VLEiSkrEa | 722 | USERPAT1 . | . | . |
| A0A452DJ84_BOVIN 706<br>sEEElLaa.VLEiSkrEa | 722 | USERPAT1 . | . | . |
| A0A452DUW2_CAPHI 706<br>sEEElLaa.VLEiSkrEa | 722 | USERPAT1 . | . | . |
| A0A452DUW2_CAPHI 706<br>sEEElLaa.VLEiSkrEa | 722 | USERPAT1 . | . | . |

|                                            |     |            |   |   |
|--------------------------------------------|-----|------------|---|---|
| A0A452DUW2_CAPHI 706<br>sEEElLaa.VLEiSkrEa | 722 | USERPAT1 . | . | . |
| A0A452ELE0_CAPHI 334<br>sEEDmLqa.AVTmSleTv | 350 | USERPAT1 . | . | . |
| A0A452ELE0_CAPHI 334<br>sEEDmLqa.AVTmSleTv | 350 | USERPAT1 . | . | . |
| A0A452ELE0_CAPHI 334<br>sEEDmLqa.AVTmSleTv | 350 | USERPAT1 . | . | . |
| A0A452ERN2_CAPHI 151<br>tDEEqAisrVLEaSiaEn | 168 | USERPAT1 . | . | . |
| A0A452ERN2_CAPHI 151<br>tDEEqAisrVLEaSiaEn | 168 | USERPAT1 . | . | . |
| A0A452ERQ3_CAPHI 118<br>tDEEqAisrVLEaSiaEn | 135 | USERPAT1 . | . | . |
| A0A452ERQ3_CAPHI 118<br>tDEEqAisrVLEaSiaEn | 135 | USERPAT1 . | . | . |
| A0A452ERR7_CAPHI 146<br>tDEEqAisrVLEaSiaEn | 163 | USERPAT1 . | . | . |
| A0A452ERR7_CAPHI 146<br>tDEEqAisrVLEaSiaEn | 163 | USERPAT1 . | . | . |
| A0A452ERT6_CAPHI 123<br>tDEEqAisrVLEaSiaEn | 140 | USERPAT1 . | . | . |
| A0A452ERT6_CAPHI 123<br>tDEEqAisrVLEaSiaEn | 140 | USERPAT1 . | . | . |
| A0A452ERW3_CAPHI 151<br>tDEEqAisrVLEaSiaEn | 168 | USERPAT1 . | . | . |
| A0A452ERW3_CAPHI 151<br>tDEEqAisrVLEaSiaEn | 168 | USERPAT1 . | . | . |
| A0A452H1J7_9SAUR 715<br>sEDElLaa.VLEiSkrEa | 731 | USERPAT1 . | . | . |
| A0A452H1J7_9SAUR 715<br>sEDElLaa.VLEiSkrEa | 731 | USERPAT1 . | . | . |
| A0A452H1J7_9SAUR 715<br>sEDElLaa.VLEiSkrEa | 731 | USERPAT1 . | . | . |
| A0A452H1R4_9SAUR 715<br>sEDElLaa.VLEiSkrEa | 731 | USERPAT1 . | . | . |
| A0A452H1R4_9SAUR 715<br>sEDElLaa.VLEiSkrEa | 731 | USERPAT1 . | . | . |
| A0A452H1R4_9SAUR 715<br>sEDElLaa.VLEiSkrEa | 731 | USERPAT1 . | . | . |
| A0A452H270_9SAUR 88<br>sEDElLaa.VLEiSkrEa  | 104 | USERPAT1 . | . | . |
| A0A452H270_9SAUR 88<br>sEDElLaa.VLEiSkrEa  | 104 | USERPAT1 . | . | . |
| A0A452H270_9SAUR 88<br>sEDElLaa.VLEiSkrEa  | 104 | USERPAT1 . | . | . |

sEDELlLaa.VLEiSkrEa

|                                             |     |            |   |   |
|---------------------------------------------|-----|------------|---|---|
| A0A452Q8F3_URSAM 95<br>sEEELlLaa.VLEmSkrEs  | 111 | USERPAT1 . | . | . |
| A0A452Q8F3_URSAM 95<br>sEEELlLaa.VLEmSkrEs  | 111 | USERPAT1 . | . | . |
| A0A452Q8F3_URSAM 95<br>sEEELlLaa.VLEmSkrEs  | 111 | USERPAT1 . | . | . |
| A0A452QRA9_URSAM 197<br>sEDEaLqr.ALElSlaEn  | 213 | USERPAT1 . | . | . |
| A0A452SVJ4_URSAM 275<br>sEEDmLqa.AVTlSleTv  | 291 | USERPAT1 . | . | . |
| A0A452SVJ4_URSAM 275<br>sEEDmLqa.AVTlSleTv  | 291 | USERPAT1 . | . | . |
| A0A452SVJ4_URSAM 275<br>sEEDmLqa.AVTlSleTv  | 291 | USERPAT1 . | . | . |
| A0A452SVY9_URSAM 263<br>sEEDmLqa.AVTlSleTv  | 279 | USERPAT1 . | . | . |
| A0A452SVY9_URSAM 263<br>sEEDmLqa.AVTlSleTv  | 279 | USERPAT1 . | . | . |
| A0A452SVY9_URSAM 263<br>sEEDmLqa.AVTlSleTv  | 279 | USERPAT1 . | . | . |
| A0A452SW03_URSAM 325<br>sEEDmLqa.AVTlSleTv  | 341 | USERPAT1 . | . | . |
| A0A452SW03_URSAM 325<br>sEEDmLqa.AVTlSleTv  | 341 | USERPAT1 . | . | . |
| A0A452SW03_URSAM 325<br>sEEDmLqa.AVTlSleTv  | 341 | USERPAT1 . | . | . |
| A0A452SW18_URSAM 332<br>sEEDmLqa.AVTlSleTv  | 348 | USERPAT1 . | . | . |
| A0A452SW18_URSAM 332<br>sEEDmLqa.AVTlSleTv  | 348 | USERPAT1 . | . | . |
| A0A452SW18_URSAM 332<br>sEEDmLqa.AVTlSleTv  | 348 | USERPAT1 . | . | . |
| A0A452SW49_URSAM 303<br>sEEDmLqa.AVTlSleTv  | 319 | USERPAT1 . | . | . |
| A0A452SW49_URSAM 303<br>sEEDmLqa.AVTlSleTv  | 319 | USERPAT1 . | . | . |
| A0A452SW49_URSAM 303<br>sEEDmLqa.AVTlSleTv  | 319 | USERPAT1 . | . | . |
| A0A455ANT6_PHYMC 706<br>sEEELlLaa.VLEiSkrEa | 722 | USERPAT1 . | . | . |
| A0A455ANT6_PHYMC 706<br>sEEELlLaa.VLEiSkrEa | 722 | USERPAT1 . | . | . |
| A0A455ANT6_PHYMC 706<br>sEEELlLaa.VLEiSkrEa | 722 | USERPAT1 . | . | . |

|                                            |     |            |   |   |
|--------------------------------------------|-----|------------|---|---|
| A0A455B0F9_PHYMC 706<br>sEEElLaa.VLEiSkrEa | 722 | USERPAT1 . | . | . |
| A0A455B0F9_PHYMC 706<br>sEEElLaa.VLEiSkrEa | 722 | USERPAT1 . | . | . |
| A0A455B0F9_PHYMC 706<br>sEEElLaa.VLEiSkrEa | 722 | USERPAT1 . | . | . |
| A0A455BMJ7_PHYMC 151<br>tDEEqAisrVLEaSiaEn | 168 | USERPAT1 . | . | . |
| A0A455BMJ7_PHYMC 151<br>tDEEqAisrVLEaSiaEn | 168 | USERPAT1 . | . | . |
| A0A455BQW5_PHYMC 151<br>tDEEqAisrVLEaSiaEn | 168 | USERPAT1 . | . | . |
| A0A455BQW5_PHYMC 151<br>tDEEqAisrVLEaSiaEn | 168 | USERPAT1 . | . | . |
| A0A455BT30_PHYMC 279<br>sEEDmLqa.AVTmSleTv | 295 | USERPAT1 . | . | . |
| A0A455BT30_PHYMC 279<br>sEEDmLqa.AVTmSleTv | 295 | USERPAT1 . | . | . |
| A0A455BT30_PHYMC 279<br>sEEDmLqa.AVTmSleTv | 295 | USERPAT1 . | . | . |
| A0A455BTS4_PHYMC 272<br>sEEDmLqa.AVTmSleTv | 288 | USERPAT1 . | . | . |
| A0A455BTS4_PHYMC 272<br>sEEDmLqa.AVTmSleTv | 288 | USERPAT1 . | . | . |
| A0A455BTS4_PHYMC 272<br>sEEDmLqa.AVTmSleTv | 288 | USERPAT1 . | . | . |
| A0A455C2P2_PHYMC 151<br>tDEEqAisrVLEaSiaEn | 168 | USERPAT1 . | . | . |
| A0A455C2P2_PHYMC 151<br>tDEEqAisrVLEaSiaEn | 168 | USERPAT1 . | . | . |
| A0A455C853_PHYMC 273<br>sEEDmLqa.AVTmSleTv | 289 | USERPAT1 . | . | . |
| A0A455C853_PHYMC 273<br>sEEDmLqa.AVTmSleTv | 289 | USERPAT1 . | . | . |
| A0A455C853_PHYMC 273<br>sEEDmLqa.AVTmSleTv | 289 | USERPAT1 . | . | . |
| A0A484BT32_DRONA 563<br>eDDEqLqr.VLHeSImGa | 579 | USERPAT1 . | . | . |
| A0A484BT32_DRONA 563<br>eDDEqLqr.VLHeSImGa | 579 | USERPAT1 . | . | . |
| A0A484BT32_DRONA 563<br>eDDEqLqr.VLHeSImGa | 579 | USERPAT1 . | . | . |
| A0A484BT32_DRONA 563<br>eDDEqLqr.VLHeSImGa | 579 | USERPAT1 . | . | . |
| A0A498LFL3_LABRO 630<br>nDEEmLaa.VLEmSrhDt | 646 | USERPAT1 . | . | . |

|                                             |     |            |   |   |
|---------------------------------------------|-----|------------|---|---|
| A0A498LFL3_LABRO 630<br>nDEEmLaa.VLEmSrhDt  | 646 | USERPAT1 . | . | . |
| A0A498M7M2_LABRO 122<br>tDEEqAisrVLEaSiaEn  | 139 | USERPAT1 . | . | . |
| A0A498M7M2_LABRO 122<br>tDEEqAisrVLEaSiaEn  | 139 | USERPAT1 . | . | . |
| A0A4D9DMU2_9SAUR 205<br>sEEELqr.ALEmSlaEs   | 221 | USERPAT1 . | . | . |
| A0A4D9DMU2_9SAUR 205<br>sEEELqr.ALEmSlaEs   | 221 | USERPAT1 . | . | . |
| A0A4D9E540_9SAUR 715<br>sEDELlLaa.VLEiSkrEa | 731 | USERPAT1 . | . | . |
| A0A4D9E540_9SAUR 715<br>sEDELlLaa.VLEiSkrEa | 731 | USERPAT1 . | . | . |
| A0A4D9E540_9SAUR 715<br>sEDELlLaa.VLEiSkrEa | 731 | USERPAT1 . | . | . |
| A2EEG1_TRIVA 216<br>dEDEeFrr.VLEeSrhEt      | 232 | USERPAT1 . | . | . |
| A2EEG1_TRIVA 216<br>dEDEeFrr.VLEeSrhEt      | 232 | USERPAT1 . | . | . |
| A2EEG1_TRIVA 216<br>dEDEeFrr.VLEeSrhEt      | 232 | USERPAT1 . | . | . |
| A2EEG1_TRIVA 216<br>dEDEeFrr.VLEeSrhEt      | 232 | USERPAT1 . | . | . |
| A3GG13_PICST 656<br>dEEDeVmrrVLElSlhEh      | 673 | USERPAT1 . | . | . |
| A3GG13_PICST 656<br>dEEDeVmrrVLElSlhEh      | 673 | USERPAT1 . | . | . |
| A3GG13_PICST 656<br>dEEDeVmrrVLElSlhEh      | 673 | USERPAT1 . | . | . |
| ATX3L_HUMAN 224<br>qDEEdFqr.ALElSrqEt       | 240 | USERPAT1 . | . | . |
| ATX3L_HUMAN 224<br>qDEEdFqr.ALElSrqEt       | 240 | USERPAT1 . | . | . |
| ATX3_HUMAN 335<br>sEEDmLqa.AVTmSleTv        | 351 | USERPAT1 . | . | . |
| ATX3_HUMAN 335<br>sEEDmLqa.AVTmSleTv        | 351 | USERPAT1 . | . | . |
| ATX3_HUMAN 335<br>sEEDmLqa.AVTmSleTv        | 351 | USERPAT1 . | . | . |
| ATX3_MOUSE 329<br>sEEDmLra.AVTmSleTa        | 345 | USERPAT1 . | . | . |
| ATX3_MOUSE 329<br>sEEDmLra.AVTmSleTa        | 345 | USERPAT1 . | . | . |
| ATX3_MOUSE 329<br>sEEDmLra.AVTmSleTa        | 345 | USERPAT1 . | . | . |

|                    |      |      |            |   |   |
|--------------------|------|------|------------|---|---|
| B4H729_DROPE       | 504  | 520  | USERPAT1 . | . | . |
| eDDEqLqr.VLHeSllGa |      |      |            |   |   |
| B4H729_DROPE       | 504  | 520  | USERPAT1 . | . | . |
| eDDEqLqr.VLHeSllGa |      |      |            |   |   |
| B4H729_DROPE       | 504  | 520  | USERPAT1 . | . | . |
| eDDEqLqr.VLHeSllGa |      |      |            |   |   |
| B4H729_DROPE       | 504  | 520  | USERPAT1 . | . | . |
| eDDEqLqr.VLHeSllGa |      |      |            |   |   |
| B4JVM8_DROGR       | 572  | 588  | USERPAT1 . | . | . |
| eDDEqLqr.VLHeSllGa |      |      |            |   |   |
| B4JVM8_DROGR       | 572  | 588  | USERPAT1 . | . | . |
| eDDEqLqr.VLHeSllGa |      |      |            |   |   |
| B4JVM8_DROGR       | 572  | 588  | USERPAT1 . | . | . |
| eDDEqLqr.VLHeSllGa |      |      |            |   |   |
| B4JVM8_DROGR       | 572  | 588  | USERPAT1 . | . | . |
| eDDEqLqr.VLHeSllGa |      |      |            |   |   |
| B4KU71_DROMO       | 563  | 579  | USERPAT1 . | . | . |
| eDDEqLqr.VLHeSlmGa |      |      |            |   |   |
| B4KU71_DROMO       | 563  | 579  | USERPAT1 . | . | . |
| eDDEqLqr.VLHeSlmGa |      |      |            |   |   |
| B4KU71_DROMO       | 563  | 579  | USERPAT1 . | . | . |
| eDDEqLqr.VLHeSlmGa |      |      |            |   |   |
| B4KU71_DROMO       | 563  | 579  | USERPAT1 . | . | . |
| eDDEqLqr.VLHeSlmGa |      |      |            |   |   |
| B4MCN8_DROVI       | 564  | 580  | USERPAT1 . | . | . |
| eDDEqLqr.VLHeSllGa |      |      |            |   |   |
| B4MCN8_DROVI       | 564  | 580  | USERPAT1 . | . | . |
| eDDEqLqr.VLHeSllGa |      |      |            |   |   |
| B4MCN8_DROVI       | 564  | 580  | USERPAT1 . | . | . |
| eDDEqLqr.VLHeSllGa |      |      |            |   |   |
| B4MCN8_DROVI       | 564  | 580  | USERPAT1 . | . | . |
| eDDEqLqr.VLHeSllGa |      |      |            |   |   |
| C9JQV6_HUMAN       | 265  | 281  | USERPAT1 . | . | . |
| sEEDmLqa.AVTmSleTv |      |      |            |   |   |
| C9JQV6_HUMAN       | 265  | 281  | USERPAT1 . | . | . |
| sEEDmLqa.AVTmSleTv |      |      |            |   |   |
| C9JQV6_HUMAN       | 265  | 281  | USERPAT1 . | . | . |
| sEEDmLqa.AVTmSleTv |      |      |            |   |   |
| C9SHD9_VERA1       | 1166 | 1182 | USERPAT1 . | . | . |
| dDDEdFkr.ALEaSkIPs |      |      |            |   |   |
| C9SHD9_VERA1       | 1166 | 1182 | USERPAT1 . | . | . |
| dDDEdFkr.ALEaSkIPs |      |      |            |   |   |
| C9SHD9_VERA1       | 1166 | 1182 | USERPAT1 . | . | . |
| dDDEdFkr.ALEaSkIPs |      |      |            |   |   |
| D2V513_NAEGR       | 146  | 162  | USERPAT1 . | . | . |
| nEDEeLqr.VLElSkqEh |      |      |            |   |   |
| D2V513_NAEGR       | 146  | 162  | USERPAT1 . | . | . |



nEDEeLqr.VLElSkqEh

|                    |     |     |            |   |   |
|--------------------|-----|-----|------------|---|---|
| D4ABE5_RAT         | 704 | 720 | USERPAT1 . | . | . |
| sEEEvLaa.VLEiSrrEa |     |     |            |   |   |
| D4ABE5_RAT         | 704 | 720 | USERPAT1 . | . | . |
| sEEEvLaa.VLEiSrrEa |     |     |            |   |   |
| D4ABE5_RAT         | 704 | 720 | USERPAT1 . | . | . |
| sEEEvLaa.VLEiSrrEa |     |     |            |   |   |
| D4ACD3_RAT         | 124 | 141 | USERPAT1 . | . | . |
| tDEEqAisrVLEaSiaEn |     |     |            |   |   |
| D4ACD3_RAT         | 124 | 141 | USERPAT1 . | . | . |
| tDEEqAisrVLEaSiaEn |     |     |            |   |   |
| DAR6_ARATH         | 244 | 260 | USERPAT1 . | . | . |
| dEEEqLak.AVEeSlkGk |     |     |            |   |   |
| DAR6_ARATH         | 244 | 260 | USERPAT1 . | . | . |
| dEEEqLak.AVEeSlkGk |     |     |            |   |   |
| E0CY18_MOUSE       | 197 | 213 | USERPAT1 . | . | . |
| sEDEaLqr.ALElSlaEa |     |     |            |   |   |
| E1ZSZ0_CHLVA       | 160 | 176 | USERPAT1 . | . | . |
| dEDEeLqr.ALEmSmaGg |     |     |            |   |   |
| E2QUQ9_CANLF       | 333 | 349 | USERPAT1 . | . | . |
| sEEDmLqa.AVTmSleTv |     |     |            |   |   |
| E2QUQ9_CANLF       | 333 | 349 | USERPAT1 . | . | . |
| sEEDmLqa.AVTmSleTv |     |     |            |   |   |
| E2QUQ9_CANLF       | 333 | 349 | USERPAT1 . | . | . |
| sEEDmLqa.AVTmSleTv |     |     |            |   |   |
| E2QW53_CANLF       | 123 | 140 | USERPAT1 . | . | . |
| tDEEqAisrVLEaSiaEn |     |     |            |   |   |
| E2QW53_CANLF       | 123 | 140 | USERPAT1 . | . | . |
| tDEEqAisrVLEaSiaEn |     |     |            |   |   |
| E2RHS7_CANLF       | 326 | 342 | USERPAT1 . | . | . |
| sEEDmLqa.AVTmSleTv |     |     |            |   |   |
| E2RHS7_CANLF       | 326 | 342 | USERPAT1 . | . | . |
| sEEDmLqa.AVTmSleTv |     |     |            |   |   |
| E2RHS7_CANLF       | 326 | 342 | USERPAT1 . | . | . |
| sEEDmLqa.AVTmSleTv |     |     |            |   |   |
| E2RK08_CANLF       | 666 | 682 | USERPAT1 . | . | . |
| sEEElLaa.VLEmSkrEa |     |     |            |   |   |
| E2RK08_CANLF       | 666 | 682 | USERPAT1 . | . | . |
| sEEElLaa.VLEmSkrEa |     |     |            |   |   |
| E2RK08_CANLF       | 666 | 682 | USERPAT1 . | . | . |
| sEEElLaa.VLEmSkrEa |     |     |            |   |   |
| E9PFU9_HUMAN       | 197 | 213 | USERPAT1 . | . | . |
| sEDEaLqr.ALEmSlaEt |     |     |            |   |   |

|                    |     |     |            |   |   |
|--------------------|-----|-----|------------|---|---|
| F1MP13_BOVIN       | 151 | 168 | USERPAT1 . | . | . |
| tDEEqAisrVLEaSiaEn |     |     |            |   |   |
| F1MP13_BOVIN       | 151 | 168 | USERPAT1 . | . | . |
| tDEEqAisrVLEaSiaEn |     |     |            |   |   |
| F2TYZ4_SALR5       | 201 | 217 | USERPAT1 . | . | . |
| aEDEeLqr.VLElSaeEh |     |     |            |   |   |
| F2TYZ4_SALR5       | 201 | 217 | USERPAT1 . | . | . |
| aEDEeLqr.VLElSaeEh |     |     |            |   |   |
| F5H211_HUMAN       | 344 | 360 | USERPAT1 . | . | . |
| sEEDmLqa.AVTmSleTv |     |     |            |   |   |
| F5H211_HUMAN       | 344 | 360 | USERPAT1 . | . | . |
| sEEDmLqa.AVTmSleTv |     |     |            |   |   |
| F5H211_HUMAN       | 344 | 360 | USERPAT1 . | . | . |
| sEEDmLqa.AVTmSleTv |     |     |            |   |   |
| F6SMT5_MONDO       | 711 | 727 | USERPAT1 . | . | . |
| sEDElLaa.VLEiSkrEa |     |     |            |   |   |
| F6SMT5_MONDO       | 711 | 727 | USERPAT1 . | . | . |
| sEDElLaa.VLEiSkrEa |     |     |            |   |   |
| F6SMT5_MONDO       | 711 | 727 | USERPAT1 . | . | . |
| sEDElLaa.VLEiSkrEa |     |     |            |   |   |
| F6SNZ3_MONDO       | 123 | 140 | USERPAT1 . | . | . |
| tDEEqAisrVLEaSiaEn |     |     |            |   |   |
| F6SNZ3_MONDO       | 123 | 140 | USERPAT1 . | . | . |
| tDEEqAisrVLEaSiaEn |     |     |            |   |   |
| F6SVL6_CALJA       | 347 | 363 | USERPAT1 . | . | . |
| sEEDmLqa.AVTmSleTv |     |     |            |   |   |
| F6SVL6_CALJA       | 347 | 363 | USERPAT1 . | . | . |
| sEEDmLqa.AVTmSleTv |     |     |            |   |   |
| F6SVL6_CALJA       | 347 | 363 | USERPAT1 . | . | . |
| sEEDmLqa.AVTmSleTv |     |     |            |   |   |
| F6SVY6_CALJA       | 285 | 301 | USERPAT1 . | . | . |
| sEEDmLqa.AVTmSleTv |     |     |            |   |   |
| F6SVY6_CALJA       | 285 | 301 | USERPAT1 . | . | . |
| sEEDmLqa.AVTmSleTv |     |     |            |   |   |
| F6SVY6_CALJA       | 285 | 301 | USERPAT1 . | . | . |
| sEEDmLqa.AVTmSleTv |     |     |            |   |   |
| F6TSS4_HORSE       | 333 | 349 | USERPAT1 . | . | . |
| sEEDmLra.AVTmSleTv |     |     |            |   |   |
| F6TSS4_HORSE       | 333 | 349 | USERPAT1 . | . | . |
| sEEDmLra.AVTmSleTv |     |     |            |   |   |
| F6TSS4_HORSE       | 333 | 349 | USERPAT1 . | . | . |
| sEEDmLra.AVTmSleTv |     |     |            |   |   |
| F6VWD3_MACMU       | 706 | 722 | USERPAT1 . | . | . |
| sEEEllaa.VLEiSkrDa |     |     |            |   |   |
| F6VWD3_MACMU       | 706 | 722 | USERPAT1 . | . | . |
| sEEEllaa.VLEiSkrDa |     |     |            |   |   |

|                    |     |     |            |   |   |
|--------------------|-----|-----|------------|---|---|
| F6Y2G0_MACMU       | 123 | 140 | USERPAT1 . | . | . |
| tDEEqAisrVLEaSiaEn |     |     |            |   |   |
| F6Y2G0_MACMU       | 123 | 140 | USERPAT1 . | . | . |
| tDEEqAisrVLEaSiaEn |     |     |            |   |   |
| F6Y2I3_MACMU       | 123 | 140 | USERPAT1 . | . | . |
| tDEEqAisrVLEaSiaEn |     |     |            |   |   |
| F6Y2I3_MACMU       | 123 | 140 | USERPAT1 . | . | . |
| tDEEqAisrVLEaSiaEn |     |     |            |   |   |
| F6Y2J9_MACMU       | 123 | 140 | USERPAT1 . | . | . |
| tDEEqAisrVLEaSiaEn |     |     |            |   |   |
| F6Y2J9_MACMU       | 123 | 140 | USERPAT1 . | . | . |
| tDEEqAisrVLEaSiaEn |     |     |            |   |   |
| F6YF39_XENTR       | 208 | 224 | USERPAT1 . | . | . |
| tEEElLqr.ALEmSlaEs |     |     |            |   |   |
| F6ZG63_HORSE       | 684 | 700 | USERPAT1 . | . | . |
| sEEElLaa.VLEiSkrEs |     |     |            |   |   |
| F6ZG63_HORSE       | 684 | 700 | USERPAT1 . | . | . |
| sEEElLaa.VLEiSkrEs |     |     |            |   |   |
| F6ZG63_HORSE       | 684 | 700 | USERPAT1 . | . | . |
| sEEElLaa.VLEiSkrEs |     |     |            |   |   |
| F6ZIZ7_HORSE       | 57  | 74  | USERPAT1 . | . | . |
| tDEEqAisrVLEaSiaEn |     |     |            |   |   |
| F6ZIZ7_HORSE       | 57  | 74  | USERPAT1 . | . | . |
| tDEEqAisrVLEaSiaEn |     |     |            |   |   |
| F7AII7_ORNAN       | 124 | 141 | USERPAT1 . | . | . |
| tDEEqAisrVLEaSiaEn |     |     |            |   |   |
| F7AII7_ORNAN       | 124 | 141 | USERPAT1 . | . | . |
| tDEEqAisrVLEaSiaEn |     |     |            |   |   |
| F7AIJ4_ORNAN       | 124 | 141 | USERPAT1 . | . | . |
| tDEEqAisrVLEaSiaEn |     |     |            |   |   |
| F7AIJ4_ORNAN       | 124 | 141 | USERPAT1 . | . | . |
| tDEEqAisrVLEaSiaEn |     |     |            |   |   |
| F7ARV7_CALJA       | 123 | 140 | USERPAT1 . | . | . |
| tDEEqAisrVLEaSiaEn |     |     |            |   |   |
| F7ARV7_CALJA       | 123 | 140 | USERPAT1 . | . | . |
| tDEEqAisrVLEaSiaEn |     |     |            |   |   |
| F7DC76_XENTR       | 711 | 727 | USERPAT1 . | . | . |
| nDDElVaa.VLEmSkkEt |     |     |            |   |   |
| F7DC76_XENTR       | 711 | 727 | USERPAT1 . | . | . |
| nDDElVaa.VLEmSkkEt |     |     |            |   |   |
| F7DY46_CALJA       | 123 | 140 | USERPAT1 . | . | . |
| tDEEqAisrVLEaSiaEn |     |     |            |   |   |
| F7DY46_CALJA       | 123 | 140 | USERPAT1 . | . | . |

tDEEqAisrVLEaSiaEn

|                    |     |     |            |   |   |
|--------------------|-----|-----|------------|---|---|
| F7ES35_CALJA       | 706 | 722 | USERPAT1 . | . | . |
| sEEElLaa.VLEiSkrEa |     |     |            |   |   |
| F7ES35_CALJA       | 706 | 722 | USERPAT1 . | . | . |
| sEEElLaa.VLEiSkrEa |     |     |            |   |   |
| F7ES35_CALJA       | 706 | 722 | USERPAT1 . | . | . |
| sEEElLaa.VLEiSkrEa |     |     |            |   |   |
| F7F5L2_CALJA       | 123 | 140 | USERPAT1 . | . | . |
| tDEEqAisrVLEaSiaEn |     |     |            |   |   |
| F7F5L2_CALJA       | 123 | 140 | USERPAT1 . | . | . |
| tDEEqAisrVLEaSiaEn |     |     |            |   |   |
| F7F5M5_CALJA       | 612 | 628 | USERPAT1 . | . | . |
| sEEElLaa.VLEiSkrEa |     |     |            |   |   |
| F7F5M5_CALJA       | 612 | 628 | USERPAT1 . | . | . |
| sEEElLaa.VLEiSkrEa |     |     |            |   |   |
| F7F5M5_CALJA       | 612 | 628 | USERPAT1 . | . | . |
| sEEElLaa.VLEiSkrEa |     |     |            |   |   |
| F7F5Q1_CALJA       | 123 | 140 | USERPAT1 . | . | . |
| tDEEqAisrVLEaSiaEn |     |     |            |   |   |
| F7F5Q1_CALJA       | 123 | 140 | USERPAT1 . | . | . |
| tDEEqAisrVLEaSiaEn |     |     |            |   |   |
| G1KAT4_ANOCA       | 697 | 713 | USERPAT1 . | . | . |
| nEElLaa.VLEmSkkEt  |     |     |            |   |   |
| G1KAT4_ANOCA       | 697 | 713 | USERPAT1 . | . | . |
| nEElLaa.VLEmSkkEt  |     |     |            |   |   |
| G1KAT4_ANOCA       | 697 | 713 | USERPAT1 . | . | . |
| nEElLaa.VLEmSkkEt  |     |     |            |   |   |
| G1L8C8_AILME       | 706 | 722 | USERPAT1 . | . | . |
| sEEElLaa.VLEmSkrEs |     |     |            |   |   |
| G1L8C8_AILME       | 706 | 722 | USERPAT1 . | . | . |
| sEEElLaa.VLEmSkrEs |     |     |            |   |   |
| G1L8C8_AILME       | 706 | 722 | USERPAT1 . | . | . |
| sEEElLaa.VLEmSkrEs |     |     |            |   |   |
| G1M8G9_AILME       | 320 | 336 | USERPAT1 . | . | . |
| sEEDmLqa.AVTmSlaTv |     |     |            |   |   |
| G1M8G9_AILME       | 320 | 336 | USERPAT1 . | . | . |
| sEEDmLqa.AVTmSlaTv |     |     |            |   |   |
| G1M8G9_AILME       | 320 | 336 | USERPAT1 . | . | . |
| sEEDmLqa.AVTmSlaTv |     |     |            |   |   |
| G1NG28_MELGA       | 715 | 731 | USERPAT1 . | . | . |
| sEElLaa.VLEiSkrEa  |     |     |            |   |   |
| G1NG28_MELGA       | 715 | 731 | USERPAT1 . | . | . |
| sEElLaa.VLEiSkrEa  |     |     |            |   |   |
| G1NG28_MELGA       | 715 | 731 | USERPAT1 . | . | . |
| sEElLaa.VLEiSkrEa  |     |     |            |   |   |

|                    |      |      |            |   |   |
|--------------------|------|------|------------|---|---|
| G1PHP0_MYOLU       | 108  | 125  | USERPAT1 . | . | . |
| tDEEqAisrVLEaSiaEn |      |      |            |   |   |
| G1PHP0_MYOLU       | 108  | 125  | USERPAT1 . | . | . |
| tDEEqAisrVLEaSiaEn |      |      |            |   |   |
| G1QNB5_NOMLE       | 116  | 133  | USERPAT1 . | . | . |
| tDEEqAisrVLEaSiaEn |      |      |            |   |   |
| G1QNB5_NOMLE       | 116  | 133  | USERPAT1 . | . | . |
| tDEEqAisrVLEaSiaEn |      |      |            |   |   |
| G1RBP9_NOMLE       | 706  | 722  | USERPAT1 . | . | . |
| sEEElLaa.VLEiSkrDa |      |      |            |   |   |
| G1RBP9_NOMLE       | 706  | 722  | USERPAT1 . | . | . |
| sEEElLaa.VLEiSkrDa |      |      |            |   |   |
| G1SMF4_RABIT       | 151  | 168  | USERPAT1 . | . | . |
| tDEEqAisrVLEaSiaEn |      |      |            |   |   |
| G1SMF4_RABIT       | 151  | 168  | USERPAT1 . | . | . |
| tDEEqAisrVLEaSiaEn |      |      |            |   |   |
| G1SPH1_RABIT       | 322  | 338  | USERPAT1 . | . | . |
| sEEDmLqa.AVTmSleTv |      |      |            |   |   |
| G1SPH1_RABIT       | 322  | 338  | USERPAT1 . | . | . |
| sEEDmLqa.AVTmSleTv |      |      |            |   |   |
| G1SPH1_RABIT       | 322  | 338  | USERPAT1 . | . | . |
| sEEDmLqa.AVTmSleTv |      |      |            |   |   |
| G1T3H8_RABIT       | 706  | 722  | USERPAT1 . | . | . |
| nEEElIaa.VLEiSkrEt |      |      |            |   |   |
| G1T3H8_RABIT       | 706  | 722  | USERPAT1 . | . | . |
| nEEElIaa.VLEiSkrEt |      |      |            |   |   |
| G2WTE6_VERDV       | 1167 | 1183 | USERPAT1 . | . | . |
| dDDEdFkr.ALEaSkiPs |      |      |            |   |   |
| G2WTE6_VERDV       | 1167 | 1183 | USERPAT1 . | . | . |
| dDDEdFkr.ALEaSkiPs |      |      |            |   |   |
| G2WTE6_VERDV       | 1167 | 1183 | USERPAT1 . | . | . |
| dDDEdFkr.ALEaSkiPs |      |      |            |   |   |
| G2WTE6_VERDV       | 1167 | 1183 | USERPAT1 . | . | . |
| dDDEdFkr.ALEaSkiPs |      |      |            |   |   |
| G3HWH3_CRIGR       | 704  | 720  | USERPAT1 . | . | . |
| sEEEvLaa.VLEiSrrEa |      |      |            |   |   |
| G3HWH3_CRIGR       | 704  | 720  | USERPAT1 . | . | . |
| sEEEvLaa.VLEiSrrEa |      |      |            |   |   |
| G3HWH3_CRIGR       | 704  | 720  | USERPAT1 . | . | . |
| sEEEvLaa.VLEiSrrEa |      |      |            |   |   |
| G3I1H9_CRIGR       | 281  | 297  | USERPAT1 . | . | . |
| rEEDmLra.AVNmSleTa |      |      |            |   |   |
| G3I1H9_CRIGR       | 281  | 297  | USERPAT1 . | . | . |
| rEEDmLra.AVNmSleTa |      |      |            |   |   |
| G3I1H9_CRIGR       | 281  | 297  | USERPAT1 . | . | . |
| rEEDmLra.AVNmSleTa |      |      |            |   |   |

|                     |     |     |            |   |   |
|---------------------|-----|-----|------------|---|---|
| G3NDF4_GASAC        | 696 | 712 | USERPAT1 . | . | . |
| nDDEmLaa.VLEmSrqaEa |     |     |            |   |   |
| G3NDF4_GASAC        | 696 | 712 | USERPAT1 . | . | . |
| nDDEmLaa.VLEmSrqaEa |     |     |            |   |   |
| G3NDF4_GASAC        | 696 | 712 | USERPAT1 . | . | . |
| nDDEmLaa.VLEmSrqaEa |     |     |            |   |   |
| G3Q9R1_GASAC        | 122 | 139 | USERPAT1 . | . | . |
| tDEEqAisrVLEaSiaEn  |     |     |            |   |   |
| G3Q9R1_GASAC        | 122 | 139 | USERPAT1 . | . | . |
| tDEEqAisrVLEaSiaEn  |     |     |            |   |   |
| G3QGR2_GORG0        | 123 | 140 | USERPAT1 . | . | . |
| tDEEqAisrVLEaSiaEn  |     |     |            |   |   |
| G3QGR2_GORG0        | 123 | 140 | USERPAT1 . | . | . |
| tDEEqAisrVLEaSiaEn  |     |     |            |   |   |
| G3RE51_GORG0        | 276 | 292 | USERPAT1 . | . | . |
| sEEDmLqa.AVTmSleTv  |     |     |            |   |   |
| G3RE51_GORG0        | 276 | 292 | USERPAT1 . | . | . |
| sEEDmLqa.AVTmSleTv  |     |     |            |   |   |
| G3RE51_GORG0        | 276 | 292 | USERPAT1 . | . | . |
| sEEDmLqa.AVTmSleTv  |     |     |            |   |   |
| G3REK7_GORG0        | 610 | 626 | USERPAT1 . | . | . |
| sEEElLaa.VLEiSkrDa  |     |     |            |   |   |
| G3REK7_GORG0        | 610 | 626 | USERPAT1 . | . | . |
| sEEElLaa.VLEiSkrDa  |     |     |            |   |   |
| G3S3D3_GORG0        | 704 | 720 | USERPAT1 . | . | . |
| sEEElLaa.VLEiSkrDa  |     |     |            |   |   |
| G3S3D3_GORG0        | 704 | 720 | USERPAT1 . | . | . |
| sEEElLaa.VLEiSkrDa  |     |     |            |   |   |
| G3SA57_GORG0        | 261 | 277 | USERPAT1 . | . | . |
| sEEDmLqa.AVTmSleTv  |     |     |            |   |   |
| G3SA57_GORG0        | 261 | 277 | USERPAT1 . | . | . |
| sEEDmLqa.AVTmSleTv  |     |     |            |   |   |
| G3SA57_GORG0        | 261 | 277 | USERPAT1 . | . | . |
| sEEDmLqa.AVTmSleTv  |     |     |            |   |   |
| G3TA40_LOXAF        | 35  | 52  | USERPAT1 . | . | . |
| tDEEqAisrVLEaSiaEn  |     |     |            |   |   |
| G3TA40_LOXAF        | 35  | 52  | USERPAT1 . | . | . |
| tDEEqAisrVLEaSiaEn  |     |     |            |   |   |
| G3TES3_LOXAF        | 707 | 723 | USERPAT1 . | . | . |
| sEEElVaa.VLEiSkrEt  |     |     |            |   |   |
| G3TES3_LOXAF        | 707 | 723 | USERPAT1 . | . | . |
| sEEElVaa.VLEiSkrEt  |     |     |            |   |   |
| G3VV53_SARHA        | 136 | 153 | USERPAT1 . | . | . |
| tDEEqAisrVLEaSiaEn  |     |     |            |   |   |

|                     |     |     |            |   |   |
|---------------------|-----|-----|------------|---|---|
| G3VV53_SARHA        | 136 | 153 | USERPAT1 . | . | . |
| tDEEqAisrVLEaSiaEn  |     |     |            |   |   |
| G3VV54_SARHA        | 123 | 140 | USERPAT1 . | . | . |
| tDEEqAisrVLEaSiaEn  |     |     |            |   |   |
| G3VV54_SARHA        | 123 | 140 | USERPAT1 . | . | . |
| tDEEqAisrVLEaSiaEn  |     |     |            |   |   |
| G3WTH5_SARHA        | 711 | 727 | USERPAT1 . | . | . |
| sEDELlLaa.VLEiSkkEa |     |     |            |   |   |
| G3WTH5_SARHA        | 711 | 727 | USERPAT1 . | . | . |
| sEDELlLaa.VLEiSkkEa |     |     |            |   |   |
| G3WTH5_SARHA        | 711 | 727 | USERPAT1 . | . | . |
| sEDELlLaa.VLEiSkkEa |     |     |            |   |   |
| G3WTH6_SARHA        | 710 | 726 | USERPAT1 . | . | . |
| sEDELlLaa.VLEiSkkEa |     |     |            |   |   |
| G3WTH6_SARHA        | 710 | 726 | USERPAT1 . | . | . |
| sEDELlLaa.VLEiSkkEa |     |     |            |   |   |
| G3WTH6_SARHA        | 710 | 726 | USERPAT1 . | . | . |
| sEDELlLaa.VLEiSkkEa |     |     |            |   |   |
| G5AZI7_HETGA        | 638 | 654 | USERPAT1 . | . | . |
| sEEELlLaa.VLEiSkRt  |     |     |            |   |   |
| G5AZI7_HETGA        | 638 | 654 | USERPAT1 . | . | . |
| sEEELlLaa.VLEiSkRt  |     |     |            |   |   |
| G5AZI7_HETGA        | 638 | 654 | USERPAT1 . | . | . |
| sEEELlLaa.VLEiSkRt  |     |     |            |   |   |
| G5AZL7_HETGA        | 347 | 363 | USERPAT1 . | . | . |
| sEEDmLqa.AVTmSleTv  |     |     |            |   |   |
| G5AZL7_HETGA        | 347 | 363 | USERPAT1 . | . | . |
| sEEDmLqa.AVTmSleTv  |     |     |            |   |   |
| G5AZL7_HETGA        | 347 | 363 | USERPAT1 . | . | . |
| sEEDmLqa.AVTmSleTv  |     |     |            |   |   |
| G8Y9V0_PICSO        | 279 | 295 | USERPAT1 . | . | . |
| dEDEqLrr.ALElSlqDs  |     |     |            |   |   |
| G8Y9V0_PICSO        | 279 | 295 | USERPAT1 . | . | . |
| dEDEqLrr.ALElSlqDs  |     |     |            |   |   |
| H0UXL2_CAVPO        | 123 | 140 | USERPAT1 . | . | . |
| tDEEqAisrVLEaSiaEn  |     |     |            |   |   |
| H0UXL2_CAVPO        | 123 | 140 | USERPAT1 . | . | . |
| tDEEqAisrVLEaSiaEn  |     |     |            |   |   |
| H0VHY0_CAVPO        | 325 | 341 | USERPAT1 . | . | . |
| sEEDmLqa.AVTmSleTv  |     |     |            |   |   |
| H0VHY0_CAVPO        | 325 | 341 | USERPAT1 . | . | . |
| sEEDmLqa.AVTmSleTv  |     |     |            |   |   |
| H0VHY0_CAVPO        | 325 | 341 | USERPAT1 . | . | . |
| sEEDmLqa.AVTmSleTv  |     |     |            |   |   |
| H0VSL2_CAVPO        | 706 | 722 | USERPAT1 . | . | . |

|                    |     |     |            |   |   |
|--------------------|-----|-----|------------|---|---|
| nEEElLaa.VLEiSkrEa |     |     |            |   |   |
| H0VSL2_CAVPO       | 706 | 722 | USERPAT1 . | . | . |
| nEEElLaa.VLEiSkrEa |     |     |            |   |   |
| H0VSL2_CAVPO       | 706 | 722 | USERPAT1 . | . | . |
| nEEElLaa.VLEiSkrEa |     |     |            |   |   |
| H0WPC2_OTOGA       | 711 | 727 | USERPAT1 . | . | . |
| sEEElLta.VLEiSkrEt |     |     |            |   |   |
| H0WPC2_OTOGA       | 711 | 727 | USERPAT1 . | . | . |
| sEEElLta.VLEiSkrEt |     |     |            |   |   |
| H0X9P3_OTOGA       | 126 | 143 | USERPAT1 . | . | . |
| tDEEqAisrVLEaSiaEn |     |     |            |   |   |
| H0X9P3_OTOGA       | 126 | 143 | USERPAT1 . | . | . |
| tDEEqAisrVLEaSiaEn |     |     |            |   |   |
| H0Z4Z5_TAEGU       | 714 | 730 | USERPAT1 . | . | . |
| sEDElLaa.VLEiSkrEa |     |     |            |   |   |
| H0Z4Z5_TAEGU       | 714 | 730 | USERPAT1 . | . | . |
| sEDElLaa.VLEiSkrEa |     |     |            |   |   |
| H0Z4Z5_TAEGU       | 714 | 730 | USERPAT1 . | . | . |
| sEDElLaa.VLEiSkrEa |     |     |            |   |   |
| H0ZTK0_TAEGU       | 123 | 140 | USERPAT1 . | . | . |
| tDEEqAisrVLEaSiaEn |     |     |            |   |   |
| H0ZTK0_TAEGU       | 123 | 140 | USERPAT1 . | . | . |
| tDEEqAisrVLEaSiaEn |     |     |            |   |   |
| H2MJB1_ORYLA       | 653 | 669 | USERPAT1 . | . | . |
| nDDEmLaa.VLEmSrqEa |     |     |            |   |   |
| H2MJB1_ORYLA       | 653 | 669 | USERPAT1 . | . | . |
| nDDEmLaa.VLEmSrqEa |     |     |            |   |   |
| H2MJB1_ORYLA       | 653 | 669 | USERPAT1 . | . | . |
| nDDEmLaa.VLEmSrqEa |     |     |            |   |   |
| H2NM22_PONAB       | 305 | 321 | USERPAT1 . | . | . |
| sEEDmLqa.AVTmSleTv |     |     |            |   |   |
| H2NM22_PONAB       | 305 | 321 | USERPAT1 . | . | . |
| sEEDmLqa.AVTmSleTv |     |     |            |   |   |
| H2NM22_PONAB       | 305 | 321 | USERPAT1 . | . | . |
| sEEDmLqa.AVTmSleTv |     |     |            |   |   |
| H2P2S3_PONAB       | 108 | 125 | USERPAT1 . | . | . |
| tDEEqAisrVLEaSiaEn |     |     |            |   |   |
| H2P2S3_PONAB       | 108 | 125 | USERPAT1 . | . | . |
| tDEEqAisrVLEaSiaEn |     |     |            |   |   |
| H2P2S4_PONAB       | 108 | 125 | USERPAT1 . | . | . |
| tDEEqAisrVLEaSiaEn |     |     |            |   |   |
| H2P2S4_PONAB       | 108 | 125 | USERPAT1 . | . | . |
| tDEEqAisrVLEaSiaEn |     |     |            |   |   |
| H2P8L1_PONAB       | 620 | 636 | USERPAT1 . | . | . |
| sEEElLaa.VLEiSkrDa |     |     |            |   |   |



|                    |     |     |            |   |   |
|--------------------|-----|-----|------------|---|---|
| H2P8L1_PONAB       | 620 | 636 | USERPAT1 . | . | . |
| sEEElLaa.VLEiSkrDa |     |     |            |   |   |
| H2QJF0_PANTR       | 704 | 720 | USERPAT1 . | . | . |
| sEEElLaa.VLEiSkrDa |     |     |            |   |   |
| H2QJF0_PANTR       | 704 | 720 | USERPAT1 . | . | . |
| sEEElLaa.VLEiSkrDa |     |     |            |   |   |
| H2QKV1_PANTR       | 116 | 133 | USERPAT1 . | . | . |
| tDEEqAisrVLEaSiaEn |     |     |            |   |   |
| H2QKV1_PANTR       | 116 | 133 | USERPAT1 . | . | . |
| tDEEqAisrVLEaSiaEn |     |     |            |   |   |
| H2R2I4_PANTR       | 348 | 364 | USERPAT1 . | . | . |
| sEEDmLqa.AVTmSleTv |     |     |            |   |   |
| H2R2I4_PANTR       | 348 | 364 | USERPAT1 . | . | . |
| sEEDmLqa.AVTmSleTv |     |     |            |   |   |
| H2R2I4_PANTR       | 348 | 364 | USERPAT1 . | . | . |
| sEEDmLqa.AVTmSleTv |     |     |            |   |   |
| H2ZYR3_LATCH       | 109 | 126 | USERPAT1 . | . | . |
| tDEEqAisrVLEaSiaEn |     |     |            |   |   |
| H2ZYR3_LATCH       | 109 | 126 | USERPAT1 . | . | . |
| tDEEqAisrVLEaSiaEn |     |     |            |   |   |
| H3BDY2_LATCH       | 718 | 734 | USERPAT1 . | . | . |
| sEEElLaa.VLEmSkrEt |     |     |            |   |   |
| H3BDY2_LATCH       | 718 | 734 | USERPAT1 . | . | . |
| sEEElLaa.VLEmSkrEt |     |     |            |   |   |
| H3BDY2_LATCH       | 718 | 734 | USERPAT1 . | . | . |
| sEEElLaa.VLEmSkrEt |     |     |            |   |   |
| H3BDY2_LATCH       | 718 | 734 | USERPAT1 . | . | . |
| sEEElLaa.VLEmSkrEt |     |     |            |   |   |
| H3CKN5_TETNG       | 123 | 140 | USERPAT1 . | . | . |
| tDEEqAisrVLEaSiaEn |     |     |            |   |   |
| H3CKN5_TETNG       | 123 | 140 | USERPAT1 . | . | . |
| tDEEqAisrVLEaSiaEn |     |     |            |   |   |
| H7C491_HUMAN       | 11  | 27  | USERPAT1 . | . | . |
| sEDEaLqr.ALEmSlaEt |     |     |            |   |   |
| H9FUL0_MACMU       | 334 | 350 | USERPAT1 . | . | . |
| gEEDmLqa.AVTmSleTv |     |     |            |   |   |
| H9FUL0_MACMU       | 334 | 350 | USERPAT1 . | . | . |
| gEEDmLqa.AVTmSleTv |     |     |            |   |   |
| H9FUL0_MACMU       | 334 | 350 | USERPAT1 . | . | . |
| gEEDmLqa.AVTmSleTv |     |     |            |   |   |
| H9H469_MACMU       | 279 | 295 | USERPAT1 . | . | . |
| gEEDmLqa.AVTmSleTv |     |     |            |   |   |
| H9H469_MACMU       | 279 | 295 | USERPAT1 . | . | . |
| gEEDmLqa.AVTmSleTv |     |     |            |   |   |
| H9H469_MACMU       | 279 | 295 | USERPAT1 . | . | . |

gEEDmLqa.AVTmSleTv

|                    |     |     |            |   |   |
|--------------------|-----|-----|------------|---|---|
| H9H470_MACMU       | 319 | 335 | USERPAT1 . | . | . |
| gEEDmLqa.AVTmSleTv |     |     |            |   |   |
| H9H470_MACMU       | 319 | 335 | USERPAT1 . | . | . |
| gEEDmLqa.AVTmSleTv |     |     |            |   |   |
| H9H470_MACMU       | 319 | 335 | USERPAT1 . | . | . |
| gEEDmLqa.AVTmSleTv |     |     |            |   |   |

|                    |     |     |            |   |   |
|--------------------|-----|-----|------------|---|---|
| H9KUV4_CANLF       | 706 | 722 | USERPAT1 . | . | . |
| sEEElLaa.VLEmSkrEa |     |     |            |   |   |
| H9KUV4_CANLF       | 706 | 722 | USERPAT1 . | . | . |
| sEEElLaa.VLEmSkrEa |     |     |            |   |   |
| H9KUV4_CANLF       | 706 | 722 | USERPAT1 . | . | . |
| sEEElLaa.VLEmSkrEa |     |     |            |   |   |

|                    |    |    |            |   |   |
|--------------------|----|----|------------|---|---|
| I1IGT8_BRADI       | 72 | 88 | USERPAT1 . | . | . |
| eEDEqLar.ALHeSlnTg |    |    |            |   |   |
| I1IGT8_BRADI       | 72 | 88 | USERPAT1 . | . | . |
| eEDEqLar.ALHeSlnTg |    |    |            |   |   |

|                    |     |     |            |   |   |
|--------------------|-----|-----|------------|---|---|
| I3KJB2_ORENI       | 687 | 703 | USERPAT1 . | . | . |
| nDDEmLaa.VLEiSrqEa |     |     |            |   |   |
| I3KJB2_ORENI       | 687 | 703 | USERPAT1 . | . | . |
| nDDEmLaa.VLEiSrqEa |     |     |            |   |   |
| I3KJB2_ORENI       | 687 | 703 | USERPAT1 . | . | . |
| nDDEmLaa.VLEiSrqEa |     |     |            |   |   |

|                    |     |     |            |   |   |
|--------------------|-----|-----|------------|---|---|
| I3KJB3_ORENI       | 678 | 694 | USERPAT1 . | . | . |
| nDDEmLaa.VLEiSrqEa |     |     |            |   |   |
| I3KJB3_ORENI       | 678 | 694 | USERPAT1 . | . | . |
| nDDEmLaa.VLEiSrqEa |     |     |            |   |   |
| I3KJB3_ORENI       | 678 | 694 | USERPAT1 . | . | . |
| nDDEmLaa.VLEiSrqEa |     |     |            |   |   |

|                    |     |     |            |   |   |
|--------------------|-----|-----|------------|---|---|
| I3L8M9_PIG         | 123 | 140 | USERPAT1 . | . | . |
| tDEEqAisrVLEaSiaEn |     |     |            |   |   |
| I3L8M9_PIG         | 123 | 140 | USERPAT1 . | . | . |
| tDEEqAisrVLEaSiaEn |     |     |            |   |   |

|                    |     |     |            |   |   |
|--------------------|-----|-----|------------|---|---|
| I3LEV3_PIG         | 705 | 721 | USERPAT1 . | . | . |
| sEEElLaa.VLEiSkrEa |     |     |            |   |   |
| I3LEV3_PIG         | 705 | 721 | USERPAT1 . | . | . |
| sEEElLaa.VLEiSkrEa |     |     |            |   |   |
| I3LEV3_PIG         | 705 | 721 | USERPAT1 . | . | . |
| sEEElLaa.VLEiSkrEa |     |     |            |   |   |

|                    |     |     |            |   |   |
|--------------------|-----|-----|------------|---|---|
| I3LU36_PIG         | 123 | 140 | USERPAT1 . | . | . |
| tDEEqAisrVLEaSiaEn |     |     |            |   |   |
| I3LU36_PIG         | 123 | 140 | USERPAT1 . | . | . |
| tDEEqAisrVLEaSiaEn |     |     |            |   |   |

|                    |     |     |            |   |   |
|--------------------|-----|-----|------------|---|---|
| I3MNV2_ICTTR       | 701 | 717 | USERPAT1 . | . | . |
| sEEElLaa.VLEiSkrEa |     |     |            |   |   |

|                    |     |     |            |   |   |
|--------------------|-----|-----|------------|---|---|
| I3MNV2_ICTTR       | 701 | 717 | USERPAT1 . | . | . |
| sEEElLaa.VLEiSkrEa |     |     |            |   |   |
| I3MNV2_ICTTR       | 701 | 717 | USERPAT1 . | . | . |
| sEEElLaa.VLEiSkrEa |     |     |            |   |   |
| I3MQ41_ICTTR       | 315 | 331 | USERPAT1 . | . | . |
| sEEDmLqa.AVTmSleTv |     |     |            |   |   |
| I3MQ41_ICTTR       | 315 | 331 | USERPAT1 . | . | . |
| sEEDmLqa.AVTmSleTv |     |     |            |   |   |
| I3MQ41_ICTTR       | 315 | 331 | USERPAT1 . | . | . |
| sEEDmLqa.AVTmSleTv |     |     |            |   |   |
| J9P3Q0_CANLF       | 123 | 140 | USERPAT1 . | . | . |
| tDEEqAisrVLEaSiaEn |     |     |            |   |   |
| J9P3Q0_CANLF       | 123 | 140 | USERPAT1 . | . | . |
| tDEEqAisrVLEaSiaEn |     |     |            |   |   |
| J9PA48_CANLF       | 123 | 140 | USERPAT1 . | . | . |
| tDEEqAisrVLEaSiaEn |     |     |            |   |   |
| J9PA48_CANLF       | 123 | 140 | USERPAT1 . | . | . |
| tDEEqAisrVLEaSiaEn |     |     |            |   |   |
| K0KGU5_WICCF       | 257 | 273 | USERPAT1 . | . | . |
| dDDEdLkk.ALElSlrEs |     |     |            |   |   |
| K0KGU5_WICCF       | 257 | 273 | USERPAT1 . | . | . |
| dDDEdLkk.ALElSlrEs |     |     |            |   |   |
| K1P5Q1_CRAGI       | 964 | 980 | USERPAT1 . | . | . |
| gDDEdLkr.ALElSlqEd |     |     |            |   |   |
| K1P5Q1_CRAGI       | 964 | 980 | USERPAT1 . | . | . |
| gDDEdLkr.ALElSlqEd |     |     |            |   |   |
| K1P5Q1_CRAGI       | 964 | 980 | USERPAT1 . | . | . |
| gDDEdLkr.ALElSlqEd |     |     |            |   |   |
| K7EV91_PONAB       | 302 | 318 | USERPAT1 . | . | . |
| sEEDmLqa.AVTmSleTv |     |     |            |   |   |
| K7EV91_PONAB       | 302 | 318 | USERPAT1 . | . | . |
| sEEDmLqa.AVTmSleTv |     |     |            |   |   |
| K7EV91_PONAB       | 302 | 318 | USERPAT1 . | . | . |
| sEEDmLqa.AVTmSleTv |     |     |            |   |   |
| K7FJG9_PELSI       | 146 | 163 | USERPAT1 . | . | . |
| tDEEqAisrVLEaSiaEn |     |     |            |   |   |
| K7FJG9_PELSI       | 146 | 163 | USERPAT1 . | . | . |
| tDEEqAisrVLEaSiaEn |     |     |            |   |   |
| K7FQ01_PELSI       | 715 | 731 | USERPAT1 . | . | . |
| sEElLaa.VLEiSkrEs  |     |     |            |   |   |
| K7FQ01_PELSI       | 715 | 731 | USERPAT1 . | . | . |
| sEElLaa.VLEiSkrEs  |     |     |            |   |   |
| K7FQ01_PELSI       | 715 | 731 | USERPAT1 . | . | . |
| sEElLaa.VLEiSkrEs  |     |     |            |   |   |
| L5JMJ6_PTEAL       | 128 | 145 | USERPAT1 . | . | . |

|                                                                                                                            |                   |            |   |   |
|----------------------------------------------------------------------------------------------------------------------------|-------------------|------------|---|---|
| tDEEqAisrVLEaSiaEn<br>L5JMJ6_PTEAL 128<br>tDEEqAisrVLEaSiaEn                                                               | 145               | USERPAT1 . | . | . |
| L5JQB9_PTEAL 335<br>sEEDmLqa.AVTmSleTv<br>L5JQB9_PTEAL 335<br>sEEDmLqa.AVTmSleTv<br>L5JQB9_PTEAL 335<br>sEEDmLqa.AVTmSleTv | 351<br>351<br>351 | USERPAT1 . | . | . |
| L5L1R3_PTEAL 671<br>sEEElLaa.VLEiSkrEa<br>L5L1R3_PTEAL 671<br>sEEElLaa.VLEiSkrEa<br>L5L1R3_PTEAL 671<br>sEEElLaa.VLEiSkrEa | 687<br>687<br>687 | USERPAT1 . | . | . |
| M2N5Y0_BAUPA 1236<br>tEDEdLqk.ALElSmqGh                                                                                    | 1252              | USERPAT1 . | . | . |
| M3VUA8_FELCA 123<br>tDEEqAisrVLEaSiaEn<br>M3VUA8_FELCA 123<br>tDEEqAisrVLEaSiaEn                                           | 140<br>140        | USERPAT1 . | . | . |
| M3VYE7_FELCA 705<br>sEEElLaa.VLEiSkrEa<br>M3VYE7_FELCA 705<br>sEEElLaa.VLEiSkrEa<br>M3VYE7_FELCA 705<br>sEEElLaa.VLEiSkrEa | 721<br>721<br>721 | USERPAT1 . | . | . |
| M3WT23_FELCA 325<br>sEEDmLqa.AVTmSleVv<br>M3WT23_FELCA 325<br>sEEDmLqa.AVTmSleVv<br>M3WT23_FELCA 325<br>sEEDmLqa.AVTmSleVv | 341<br>341<br>341 | USERPAT1 . | . | . |
| M3YH27_MUSPF 127<br>tDEEqAisrVLEaSiaEn<br>M3YH27_MUSPF 127<br>tDEEqAisrVLEaSiaEn                                           | 144<br>144        | USERPAT1 . | . | . |
| M3YYM3_MUSPF 705<br>sEEElLaa.VLEmSkrEa<br>M3YYM3_MUSPF 705<br>sEEElLaa.VLEmSkrEa<br>M3YYM3_MUSPF 705<br>sEEElLaa.VLEmSkrEa | 721<br>721<br>721 | USERPAT1 . | . | . |
| M4AKN0_XIPMA 680<br>nDDEmLaa.VLEmSrqaEa                                                                                    | 696               | USERPAT1 . | . | . |

|                     |     |     |            |   |   |
|---------------------|-----|-----|------------|---|---|
| M4AKN0_XIPMA        | 680 | 696 | USERPAT1 . | . | . |
| nDDEmLaa.VLEmSrqaEa |     |     |            |   |   |
| M4AKN0_XIPMA        | 680 | 696 | USERPAT1 . | . | . |
| nDDEmLaa.VLEmSrqaEa |     |     |            |   |   |
| M7BB78_CHEMY        | 715 | 731 | USERPAT1 . | . | . |
| sEDElLaa.VLEiSkrEa  |     |     |            |   |   |
| M7BB78_CHEMY        | 715 | 731 | USERPAT1 . | . | . |
| sEDElLaa.VLEiSkrEa  |     |     |            |   |   |
| M7BB78_CHEMY        | 715 | 731 | USERPAT1 . | . | . |
| sEDElLaa.VLEiSkrEa  |     |     |            |   |   |
| Q06AV3_PIG          | 327 | 343 | USERPAT1 . | . | . |
| sEEDmLqa.AVTmSleTv  |     |     |            |   |   |
| Q06AV3_PIG          | 327 | 343 | USERPAT1 . | . | . |
| sEEDmLqa.AVTmSleTv  |     |     |            |   |   |
| Q06AV3_PIG          | 327 | 343 | USERPAT1 . | . | . |
| sEEDmLqa.AVTmSleTv  |     |     |            |   |   |
| Q0P3R6_XENLA        | 197 | 213 | USERPAT1 . | . | . |
| tEEELqr.ALEmSlsEs   |     |     |            |   |   |
| Q28BY1_XENTR        | 122 | 139 | USERPAT1 . | . | . |
| tDEEqAisrVLEaSiaEn  |     |     |            |   |   |
| Q28BY1_XENTR        | 122 | 139 | USERPAT1 . | . | . |
| tDEEqAisrVLEaSiaEn  |     |     |            |   |   |
| Q6BZF2_DEBHA        | 184 | 200 | USERPAT1 . | . | . |
| dDDDeMqk.ALEmSriTa  |     |     |            |   |   |
| Q6BZF2_DEBHA        | 184 | 200 | USERPAT1 . | . | . |
| dDDDeMqk.ALEmSriTa  |     |     |            |   |   |
| Q6C7S0_YARLI        | 628 | 645 | USERPAT1 . | . | . |
| eDEEeAlarALEaSllEa  |     |     |            |   |   |
| Q6C7S0_YARLI        | 628 | 645 | USERPAT1 . | . | . |
| eDEEeAlarALEaSllEa  |     |     |            |   |   |
| Q6C7S0_YARLI        | 628 | 645 | USERPAT1 . | . | . |
| eDEEeAlarALEaSllEa  |     |     |            |   |   |
| Q6C7S0_YARLI        | 681 | 697 | USERPAT1 . | . | . |
| eEDEdLky.ALElSlaEe  |     |     |            |   |   |
| Q6C7S0_YARLI        | 681 | 697 | USERPAT1 . | . | . |
| eEDEdLky.ALElSlaEe  |     |     |            |   |   |
| Q6C7S0_YARLI        | 681 | 697 | USERPAT1 . | . | . |
| eEDEdLky.ALElSlaEe  |     |     |            |   |   |
| Q96B65_HUMAN        | 123 | 140 | USERPAT1 . | . | . |
| tDEEqAisrVLEaSiaEn  |     |     |            |   |   |
| Q96B65_HUMAN        | 123 | 140 | USERPAT1 . | . | . |
| tDEEqAisrVLEaSiaEn  |     |     |            |   |   |
| R0L3N1_ANAPL        | 715 | 731 | USERPAT1 . | . | . |
| sEDElLaa.VLEiSkrEa  |     |     |            |   |   |
| R0L3N1_ANAPL        | 715 | 731 | USERPAT1 . | . | . |
| sEDElLaa.VLEiSkrEa  |     |     |            |   |   |

|                    |      |      |            |   |   |
|--------------------|------|------|------------|---|---|
| R0L3N1_ANAPL       | 715  | 731  | USERPAT1 . | . | . |
| sEDeLLaa.VLEiSkrEa |      |      |            |   |   |
| R9PXQ8_CHICK       | 714  | 730  | USERPAT1 . | . | . |
| sEDeLLaa.VLEiSkrEa |      |      |            |   |   |
| R9PXQ8_CHICK       | 714  | 730  | USERPAT1 . | . | . |
| sEDeLLaa.VLEiSkrEa |      |      |            |   |   |
| R9PXQ8_CHICK       | 714  | 730  | USERPAT1 . | . | . |
| sEDeLLaa.VLEiSkrEa |      |      |            |   |   |
| S4R6R4_PETMA       | 648  | 664  | USERPAT1 . | . | . |
| tDEDqLkr.ALNlSkqVr |      |      |            |   |   |
| S4R6R4_PETMA       | 648  | 664  | USERPAT1 . | . | . |
| tDEDqLkr.ALNlSkqVr |      |      |            |   |   |
| S8AAA9_DACHA       | 1413 | 1429 | USERPAT1 . | . | . |
| tDDdLqr.VLEmSmkEe  |      |      |            |   |   |
| S8AAA9_DACHA       | 1413 | 1429 | USERPAT1 . | . | . |
| tDDdLqr.VLEmSmkEe  |      |      |            |   |   |
| S8AAA9_DACHA       | 1413 | 1429 | USERPAT1 . | . | . |
| tDDdLqr.VLEmSmkEe  |      |      |            |   |   |
| U3IEF8_ANAPP       | 2    | 18   | USERPAT1 . | . | . |
| sEDeLLaa.VLEiSkrEa |      |      |            |   |   |
| U3IEF8_ANAPP       | 2    | 18   | USERPAT1 . | . | . |
| sEDeLLaa.VLEiSkrEa |      |      |            |   |   |
| U3IEF8_ANAPP       | 2    | 18   | USERPAT1 . | . | . |
| sEDeLLaa.VLEiSkrEa |      |      |            |   |   |
| U3JN86_FICAL       | 714  | 730  | USERPAT1 . | . | . |
| sEDeLLaa.VLEiSkrEa |      |      |            |   |   |
| U3JN86_FICAL       | 714  | 730  | USERPAT1 . | . | . |
| sEDeLLaa.VLEiSkrEa |      |      |            |   |   |
| U3JN86_FICAL       | 714  | 730  | USERPAT1 . | . | . |
| sEDeLLaa.VLEiSkrEa |      |      |            |   |   |
| UBP25_HUMAN        | 123  | 140  | USERPAT1 . | . | . |
| tDEEqAisrVLEaSiaEn |      |      |            |   |   |
| UBP25_HUMAN        | 123  | 140  | USERPAT1 . | . | . |
| tDEEqAisrVLEaSiaEn |      |      |            |   |   |
| UBP25_MOUSE        | 123  | 140  | USERPAT1 . | . | . |
| tDEEqAisrVLEaSiaEn |      |      |            |   |   |
| UBP25_MOUSE        | 123  | 140  | USERPAT1 . | . | . |
| tDEEqAisrVLEaSiaEn |      |      |            |   |   |
| UBP37_BOVIN        | 706  | 722  | USERPAT1 . | . | . |
| sEEeLLaa.VLEiSkrEa |      |      |            |   |   |
| UBP37_BOVIN        | 706  | 722  | USERPAT1 . | . | . |
| sEEeLLaa.VLEiSkrEa |      |      |            |   |   |
| UBP37_BOVIN        | 706  | 722  | USERPAT1 . | . | . |
| sEEeLLaa.VLEiSkrEa |      |      |            |   |   |
| UBP37_CANLF        | 706  | 722  | USERPAT1 . | . | . |

|                     |     |     |            |   |   |
|---------------------|-----|-----|------------|---|---|
| sEEElLaa.VLEmSkrEa  |     |     |            |   |   |
| UBP37_CANLF         | 706 | 722 | USERPAT1 . | . | . |
| sEEElLaa.VLEmSkrEa  |     |     |            |   |   |
| UBP37_CANLF         | 706 | 722 | USERPAT1 . | . | . |
| sEEElLaa.VLEmSkrEa  |     |     |            |   |   |
| UBP37_CHICK         | 712 | 728 | USERPAT1 . | . | . |
| sEDELlLaa.VLEiSkrEa |     |     |            |   |   |
| UBP37_CHICK         | 712 | 728 | USERPAT1 . | . | . |
| sEDELlLaa.VLEiSkrEa |     |     |            |   |   |
| UBP37_CHICK         | 712 | 728 | USERPAT1 . | . | . |
| sEDELlLaa.VLEiSkrEa |     |     |            |   |   |
| UBP37_DANRE         | 672 | 688 | USERPAT1 . | . | . |
| nDEEmLaa.VLEmSrhDt  |     |     |            |   |   |
| UBP37_DANRE         | 672 | 688 | USERPAT1 . | . | . |
| nDEEmLaa.VLEmSrhDt  |     |     |            |   |   |
| UBP37_DANRE         | 672 | 688 | USERPAT1 . | . | . |
| nDEEmLaa.VLEmSrhDt  |     |     |            |   |   |
| UBP37_HUMAN         | 704 | 720 | USERPAT1 . | . | . |
| sEEElLaa.VLEiSkrDa  |     |     |            |   |   |
| UBP37_HUMAN         | 704 | 720 | USERPAT1 . | . | . |
| sEEElLaa.VLEiSkrDa  |     |     |            |   |   |
| UBP37_MOUSE         | 704 | 720 | USERPAT1 . | . | . |
| sEEEvLaa.VLEiSrrEa  |     |     |            |   |   |
| UBP37_MOUSE         | 704 | 720 | USERPAT1 . | . | . |
| sEEEvLaa.VLEiSrrEa  |     |     |            |   |   |
| UBP37_MOUSE         | 704 | 720 | USERPAT1 . | . | . |
| sEEEvLaa.VLEiSrrEa  |     |     |            |   |   |
| UBP37_PIG           | 707 | 723 | USERPAT1 . | . | . |
| sEEElLaa.VLEiSkrEa  |     |     |            |   |   |
| UBP37_PIG           | 707 | 723 | USERPAT1 . | . | . |
| sEEElLaa.VLEiSkrEa  |     |     |            |   |   |
| UBP37_PIG           | 707 | 723 | USERPAT1 . | . | . |
| sEEElLaa.VLEiSkrEa  |     |     |            |   |   |
| V7CRH6_PHAVU        | 71  | 87  | USERPAT1 . | . | . |
| eEDEqLar.ALEeSlnVe  |     |     |            |   |   |
| V7CRH6_PHAVU        | 71  | 87  | USERPAT1 . | . | . |
| eEDEqLar.ALEeSlnVe  |     |     |            |   |   |
| V7CTT5_PHAVU        | 75  | 91  | USERPAT1 . | . | . |
| eEDEqLar.ALEeSlnVe  |     |     |            |   |   |
| V7CTT5_PHAVU        | 75  | 91  | USERPAT1 . | . | . |
| eEDEqLar.ALEeSlnVe  |     |     |            |   |   |
| W2LJ66_PHYPR        | 330 | 346 | USERPAT1 . | . | . |
| dEDEDIrk.ALElSlqTa  |     |     |            |   |   |
| W2RCY5_PHYPN        | 330 | 346 | USERPAT1 . | . | . |
| dEDEDIrk.ALElSlqTa  |     |     |            |   |   |

|                    |     |     |            |   |   |
|--------------------|-----|-----|------------|---|---|
| W5KFG5_ASTMX       | 674 | 690 | USERPAT1 . | . | . |
| nDDEmLaa.VLEmSrqEa |     |     |            |   |   |
| W5KFG5_ASTMX       | 674 | 690 | USERPAT1 . | . | . |
| nDDEmLaa.VLEmSrqEa |     |     |            |   |   |
| W5KFG5_ASTMX       | 674 | 690 | USERPAT1 . | . | . |
| nDDEmLaa.VLEmSrqEa |     |     |            |   |   |
| W5MR55_LEPOC       | 676 | 692 | USERPAT1 . | . | . |
| nDEEmLaa.VLEmSrqEn |     |     |            |   |   |
| W5MR55_LEPOC       | 676 | 692 | USERPAT1 . | . | . |
| nDEEmLaa.VLEmSrqEn |     |     |            |   |   |
| W5MR55_LEPOC       | 676 | 692 | USERPAT1 . | . | . |
| nDEEmLaa.VLEmSrqEn |     |     |            |   |   |
| W5PT81_SHEEP       | 346 | 362 | USERPAT1 . | . | . |
| sEEDmLqa.AVTmSleTv |     |     |            |   |   |
| W5PT81_SHEEP       | 346 | 362 | USERPAT1 . | . | . |
| sEEDmLqa.AVTmSleTv |     |     |            |   |   |
| W5PT81_SHEEP       | 346 | 362 | USERPAT1 . | . | . |
| sEEDmLqa.AVTmSleTv |     |     |            |   |   |
| W5Q3D4_SHEEP       | 117 | 134 | USERPAT1 . | . | . |
| tDEEqAisrVLEaSiaEn |     |     |            |   |   |
| W5Q3D4_SHEEP       | 117 | 134 | USERPAT1 . | . | . |
| tDEEqAisrVLEaSiaEn |     |     |            |   |   |
| W5Q3D6_SHEEP       | 117 | 134 | USERPAT1 . | . | . |
| tDEEqAisrVLEaSiaEn |     |     |            |   |   |
| W5Q3D6_SHEEP       | 117 | 134 | USERPAT1 . | . | . |
| tDEEqAisrVLEaSiaEn |     |     |            |   |   |
| W5QEA5_SHEEP       | 706 | 722 | USERPAT1 . | . | . |
| sEEElLaa.VLEiSkrEa |     |     |            |   |   |
| W5QEA5_SHEEP       | 706 | 722 | USERPAT1 . | . | . |
| sEEElLaa.VLEiSkrEa |     |     |            |   |   |
| W5QEA5_SHEEP       | 706 | 722 | USERPAT1 . | . | . |
| sEEElLaa.VLEiSkrEa |     |     |            |   |   |
